# Supplementary material for: Trapping of carbolithiation-derived tertiary benzylic α-lithio piperidines with carbon electrophiles: Controlling the formation of α-amino quaternary and vicinal stereocenters
Source: Royal Society of Chemistry journal article supplement (doi:10.1039/c5ob01371b), 2015-01-01
Supplement: c5ob01371b1.pdf [file c5ob01371b1.pdf]

Supporting Information for:

*Trapping of carbolithiation-derived tertiary benzylic  $\alpha$ -lithio piperidines with carbon electrophiles: Controlling the formation of  $\alpha$ -amino quaternary and vicinal stereocenters*

*Timothy K. Beng, \* Nathan Fox, Daniel P. Bassler, Amir Alwali, Kayla Sincavage and Ann Wens V. Silaire*

*Department of Chemistry, Susquehanna University, 514  
University Avenue, Selinsgrove, PA 17870, USA*

[beng@susqu.edu](mailto:beng@susqu.edu)

*Contents:*

|                                                             |     |
|-------------------------------------------------------------|-----|
| 1. General procedures .....                                 | S2  |
| 2. Carbolithiation-protonation.....                         | S4  |
| 3. Carbolithiation/trapping with carbon electrophiles ..... | S18 |
| 4. Conjugate addition .....                                 | S46 |
| 5. References .....                                         | S54 |

## Experimental Section

All experiments involving organolithium reagents were carried out under an inert atmosphere of argon or nitrogen using freshly distilled solvents. Et<sub>2</sub>O and THF were distilled either from sodium benzophenone ketyl or pre-dried by degassing with argon for 60 min and passed through activated alumina columns. All electrophile reagents that were not newly purchased from commercial suppliers were distilled immediately before use. Column chromatography was performed on silica gel (60Å, 230-400 mesh). Thin-layer chromatography (TLC) was performed using Silicycle Siliplate™ glass backed plates (250 μm thickness, 60 Å porosity, F-254 indicator) and visualized using UV (254 nm) or CAM, *p*-anisaldehyde, or KMnO<sub>4</sub> stain. Unless otherwise indicated, <sup>1</sup>H, <sup>13</sup>C, and DEPT-135 NMR, COSY 45, HMQC, and NOESY spectra were acquired using C<sub>6</sub>D<sub>6</sub> or CDCl<sub>3</sub> as solvent at room temperature. Chemical shifts are quoted in parts per million (ppm). HRMS-EI<sup>+</sup> data were obtained using either electrospray ionization (ESI) or electron impact (EI) techniques. High-resolution ESI was obtained on an LTQ-FT (ion trap; analyzed using Excalibur). High resolution EI was obtained on an Autospec (magnetic sector; analyzed using MassLynx).

## Synthesis of Starting materials

*N*-Boc-piperidine was prepared according to a literature procedure reported by O'Brien.<sup>1</sup> It is also commercially available.

*N*-Boc-2-methylpiperidine was synthesized as previously reported.<sup>2</sup>

All α-aryl enecarbamates were synthesized using our recently developed reductive cross-coupling methodology.<sup>3</sup>

The substituted lactam precursors used in the synthesis of α-aryl enecarbamates were synthesized by Ru-catalyzed α-oxidation of the saturated piperidine.<sup>4</sup>

The Boc-protected *cis*-2,4-dimethylpiperidine precursor to *cis*-**30** was prepared using the method of Baudoin.<sup>5</sup>

## General Procedure A: HMPA-mediated conjugate Addition followed by protonation

To an oven-dried, septum-capped, round-bottomed flask equipped with a stir bar was added a solution of the 2-substituted enecarbamate (1.0 equiv) in THF (5 mL) nitrogen, in the presence of HMPA (1.2 equiv). The mixture was cooled to -78 °C and the organolithium (2 – 3 equiv) was

added slowly. After 5 min at this temperature, the solution was transferred to a bath at  $-30\text{ }^{\circ}\text{C}$  (internal temperature) and stirred for 2 to 5 h. After complete consumption of the starting material (as judged by LCMS/GCMS and TLC monitoring), the solution was quenched with methanol (0.5 mL). The mixture was warmed to room temperature and *sat.*  $\text{NH}_4\text{Cl}$  was added. After diluting with  $\text{Et}_2\text{O}$ , the layers were separated and the aqueous layer was extracted twice with  $\text{Et}_2\text{O}$ . The combined organic layers were dried over  $\text{Na}_2\text{SO}_4$ , filtered, and evaporated to obtain the crude product, which was purified as specified.

### **General Procedure B: HMPA-mediated conjugate Addition followed by direct trapping with a carbon electrophile**

To an oven-dried, septum-capped, round-bottomed flask equipped with a stir bar was added a solution of the 2-substituted enecarbamate (1.0 equiv) in THF (5 mL) nitrogen, in the presence of HMPA (1.2 equiv). The mixture was cooled to  $-78\text{ }^{\circ}\text{C}$  and the organolithium (2 – 3 equiv) was added slowly. After 5 min at this temperature, the solution was transferred to a bath at  $-30\text{ }^{\circ}\text{C}$  (internal temperature) and stirred for 2 to 5 h. After complete consumption of the starting material (as judged by LCMS/GCMS and TLC monitoring), the solution was returned to the bath at  $-78\text{ }^{\circ}\text{C}$  and trapped with the desired electrophile (3 – 6 equiv). The mixture was slowly warmed to room temperature overnight (in the case of highly reactive electrophiles, it was kept cold) and *sat.*  $\text{NH}_4\text{Cl}$  was added. After diluting with  $\text{Et}_2\text{O}$ , the layers were separated and the aqueous layer was extracted twice with  $\text{Et}_2\text{O}$ . The combined organic layers were dried over  $\text{Na}_2\text{SO}_4$ , filtered, and evaporated to obtain the crude product, which was purified as specified.

### **General Procedure C: Removal of Boc group**

To the *N*-Boc-compound (1.0 equiv) dissolved in freshly distilled  $\text{CH}_2\text{Cl}_2$  (0.50 M), was added  $\text{CF}_3\text{CO}_2\text{H}$  (3 equiv) under argon at  $0\text{ }^{\circ}\text{C}$ . The resulting solution was stirred for 5 h at this temperature and concentrated in vacuo to obtain the salt. The salt was basified to pH 10–12 with 20%  $\text{NaOH}_{(\text{aq})}$ . The aqueous layer was extracted with  $\text{EtOAc}$  (two times) and the combined organic layers were washed with brine, dried over  $\text{K}_2\text{CO}_3$  and concentrated under reduced pressure to give a residue. The residue was purified by flash chromatography on silica (*pretreated with 1% Et<sub>3</sub>N*) eluting with Hexane/ $\text{AcOEt}$  (30:1) +1%  $\text{Et}_3\text{N}$ .

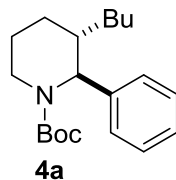

Prepared from **3b** (130 mg, 0.5 mmol) and *n*-BuLi (2.0 equiv), HMPA (1.2 equiv), and MeOH (0.5 mL), using **General Procedure A**. Purification: Flash chromatography on silica eluting with Hexane/EtOAc (95:5). Yield = 111 mg; 70%; spectroscopic data as previously reported by us.<sup>6</sup>

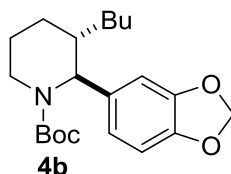

Prepared from **3f** (75.8 mg, 0.25 mmol) and *n*-BuLi (2 equiv), HMPA (1.2 equiv), and MeOH (0.5 mL), using **General Procedure A**. Purification: Flash chromatography on silica eluting with hexane:EtOAc (50:50). Yield = 60 mg; 67%. <sup>1</sup>H NMR (400 MHz, CDCl<sub>3</sub>) δ 6.93 (1H, s), 6.77 (1H, d), 6.73 (1H, d), 5.38 (2H, s), 5.12 (1H, s, br), 4.17 to 4.02 (1H, dd), 3.80 to 3.66 (1H), 2.42 to 2.13 (1H, m), 1.99 to 0.92 (19H, m), 0.79 (3H, t). <sup>13</sup>C NMR (101 MHz, CDCl<sub>3</sub>) δ 156.2, 148.0, 146.0, 134.5, 119.5, 108.1, 107.3, 100.9, 79.9, 57.1, 38.9, 35.4, 31.2, 28.4, 25.6, 23.3, 22.9, 20.1, 14.1. **HRMS-EI<sup>+</sup>** (*m/z*): calc'd for C<sub>21</sub>H<sub>31</sub>NO<sub>4</sub> 361.2253; found 361.2249.

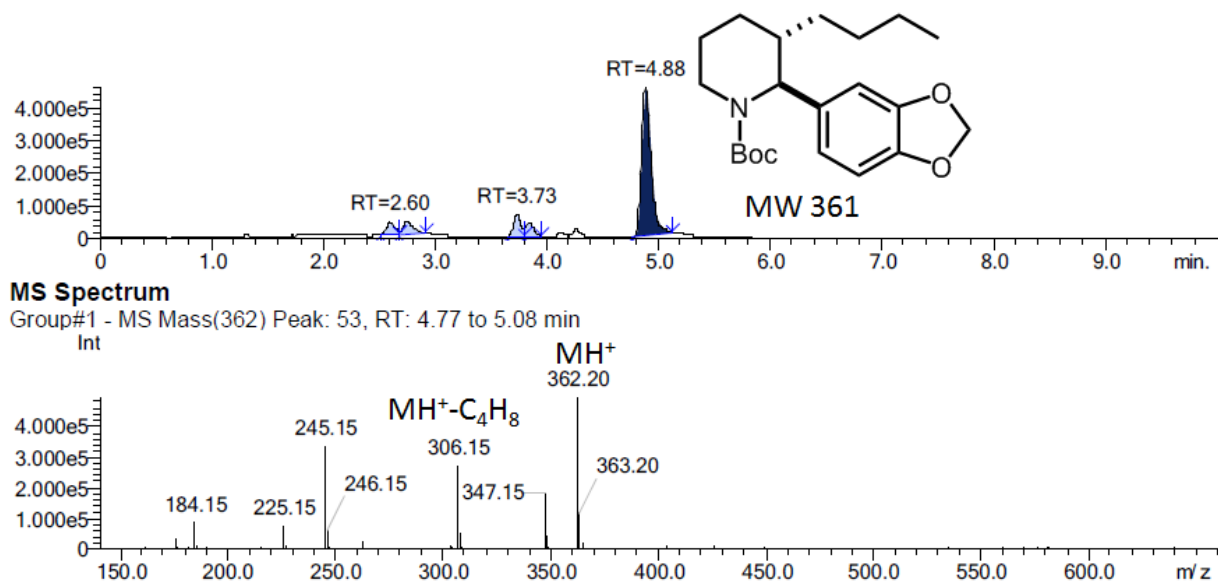

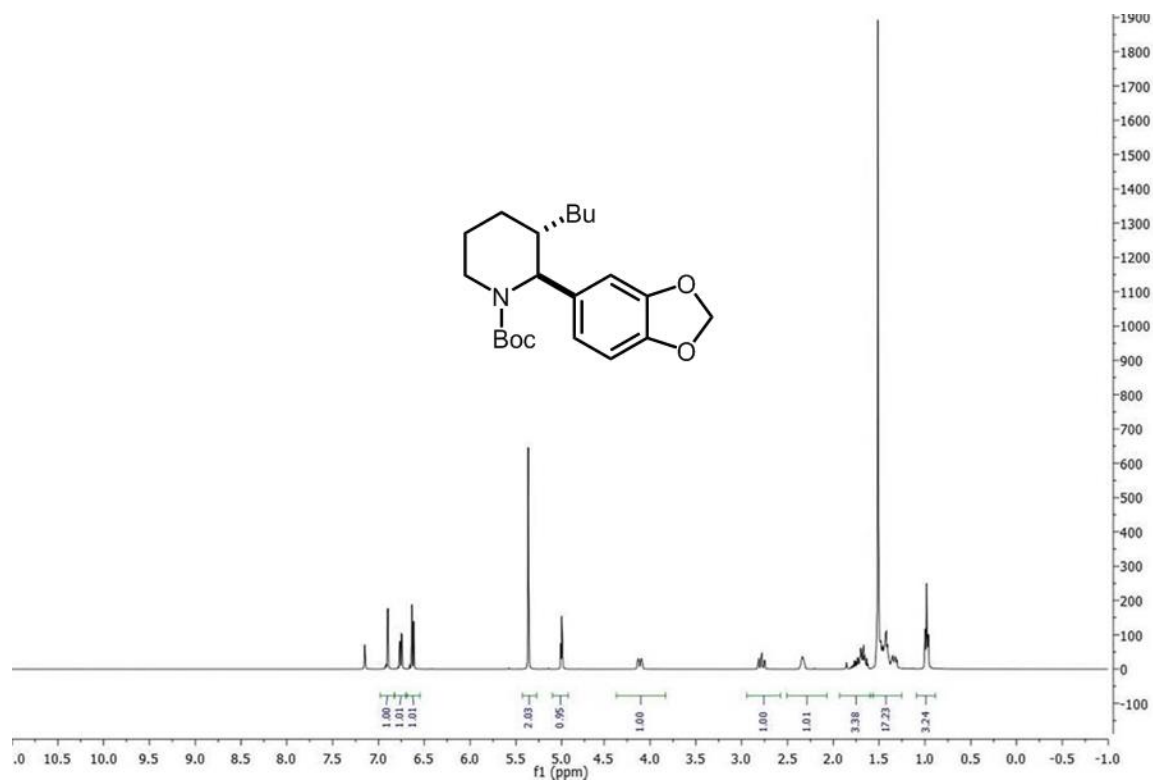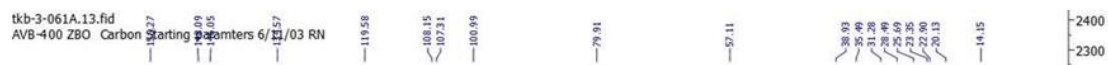

$^{13}\text{C}$  NMR (101 MHz,  $\text{CDCl}_3$ )  $\delta$  156.27, 148.09, 146.05, 134.57, 119.58, 108.15, 107.31, 100.99, 79.91, 57.11, 38.93, 35.49, 31.28, 28.49, 25.69, 23.35, 22.90, 20.13, 14.15

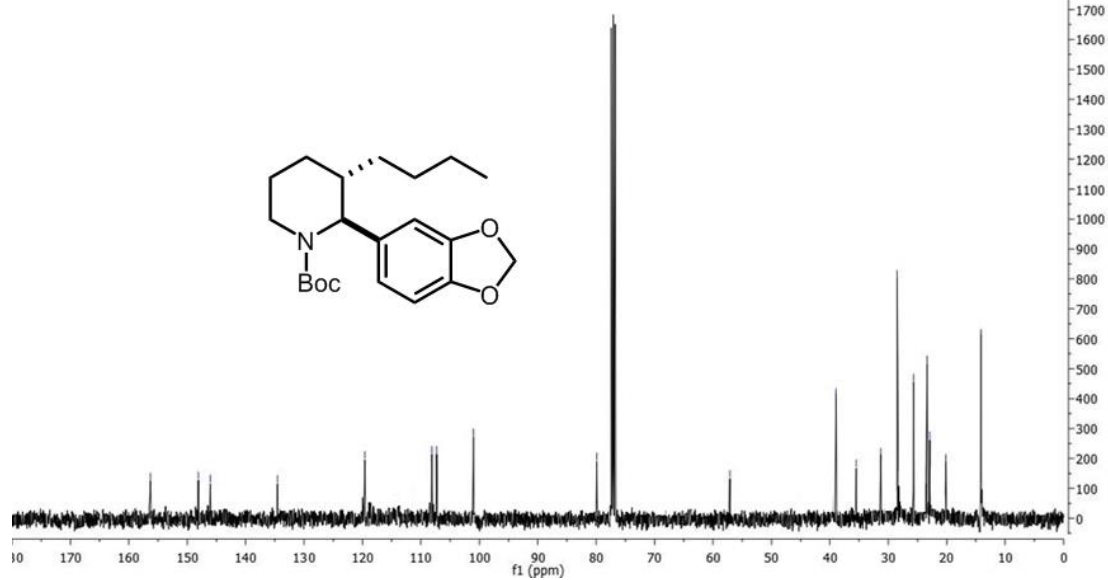

tcb-3-061A.3.fid  
 AVB-400 ZBO Carbon Starting paramters 6/11/03 RN

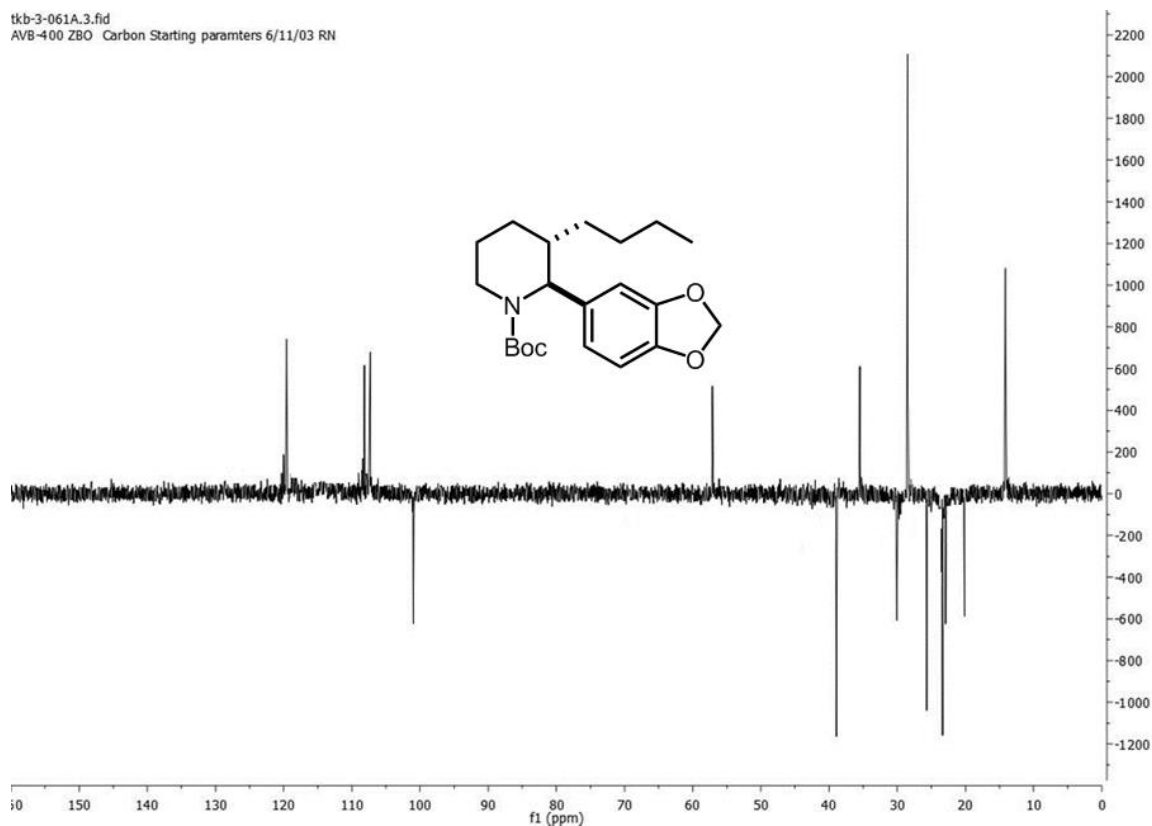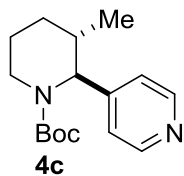

Prepared from **3g** (130 mg, 0.50 mmol), MeLi·LiBr (1.0 mL, 1.5 M in Et<sub>2</sub>O, 1.5 mmol, 3.0 equiv), HMPA (1.2 equiv), and MeOH (0.5 mL), using **General Procedure A**. Purification: Flash chromatography on silica eluting with Hexane/EtOAc (80:20 to 30:70). Yield = 108 mg; 78%. <sup>1</sup>H NMR (400 MHz, C<sub>6</sub>D<sub>6</sub>) δ 8.52 (2H, d), 6.93 (2H, d), 5.22 (1H, s, br), 4.18 to 4.13 (1H, dd), 2.92 to 2.85 (1H, m), 2.74 to 2.66 (1H, m), 1.95 to 1.68 (2H, m), 1.93 to 1.28 (11H, m), 1.23 (3H, d). <sup>13</sup>C NMR (101 MHz, C<sub>6</sub>D<sub>6</sub>) δ 153.1, 149.7, 148.0, 138.6, 119.8, 116.8, 79.6, 59.7, 39.8, 30.1, 28.5, 25.6, 20.0, 18.3. **HRMS-EI<sup>+</sup>** (*m/z*): calc'd for C<sub>16</sub>H<sub>24</sub>N<sub>2</sub>O<sub>2</sub> 276.1838; found 276.1835.

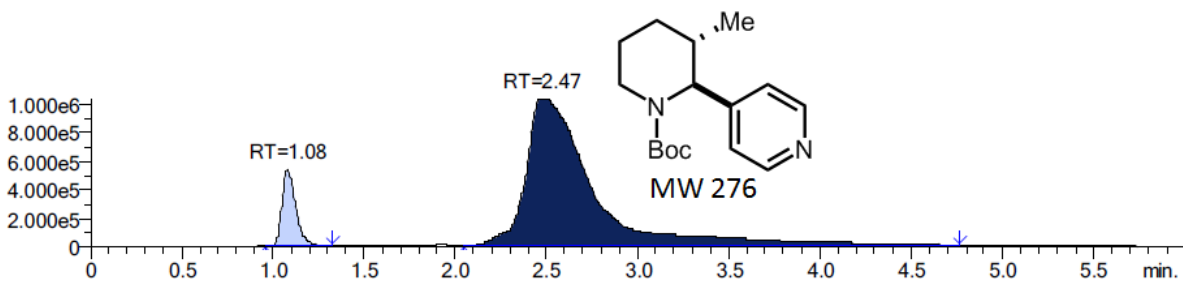

**MS Spectrum**

Group#1 - MS Mass(277) Peak: 30, RT: 2.31 to 2.90 min  
Int

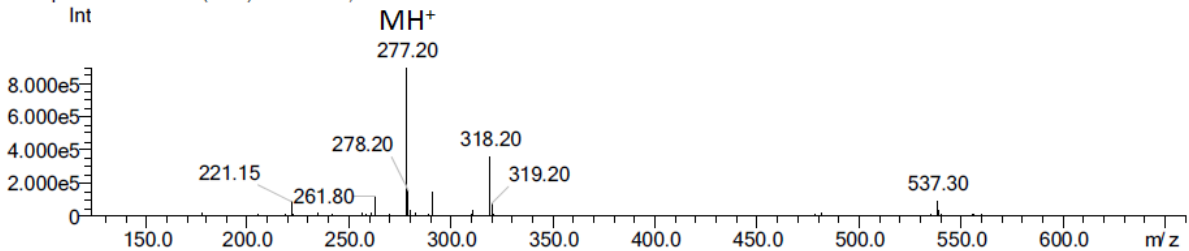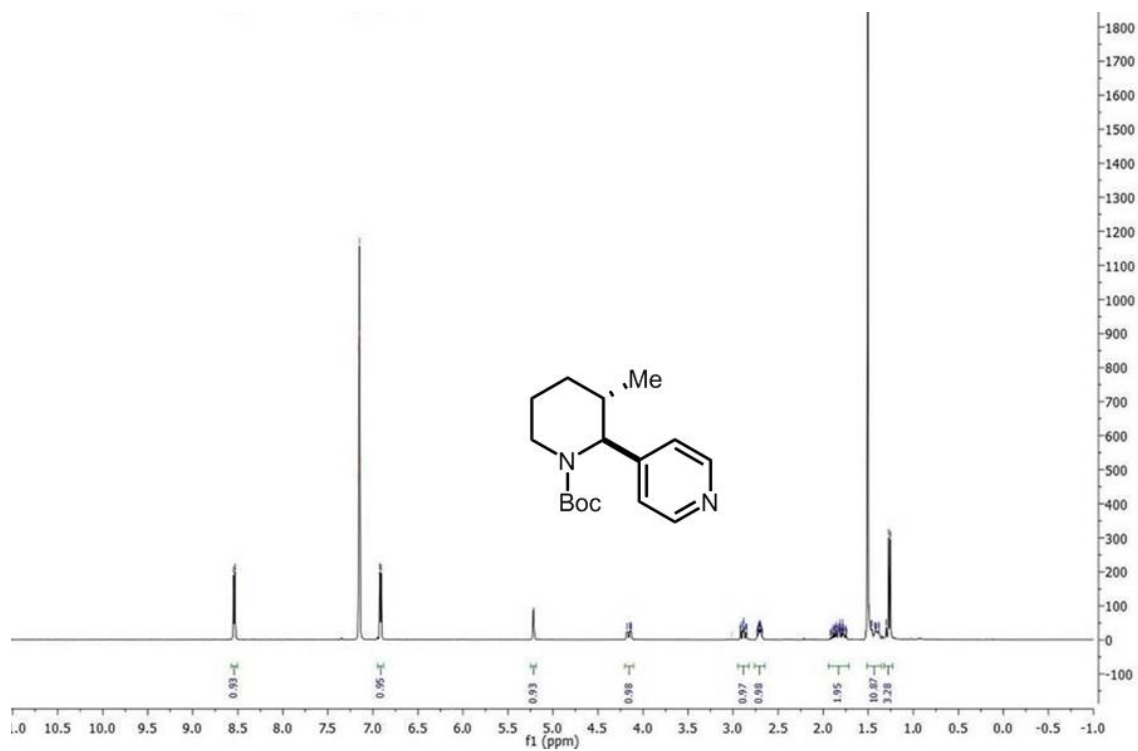

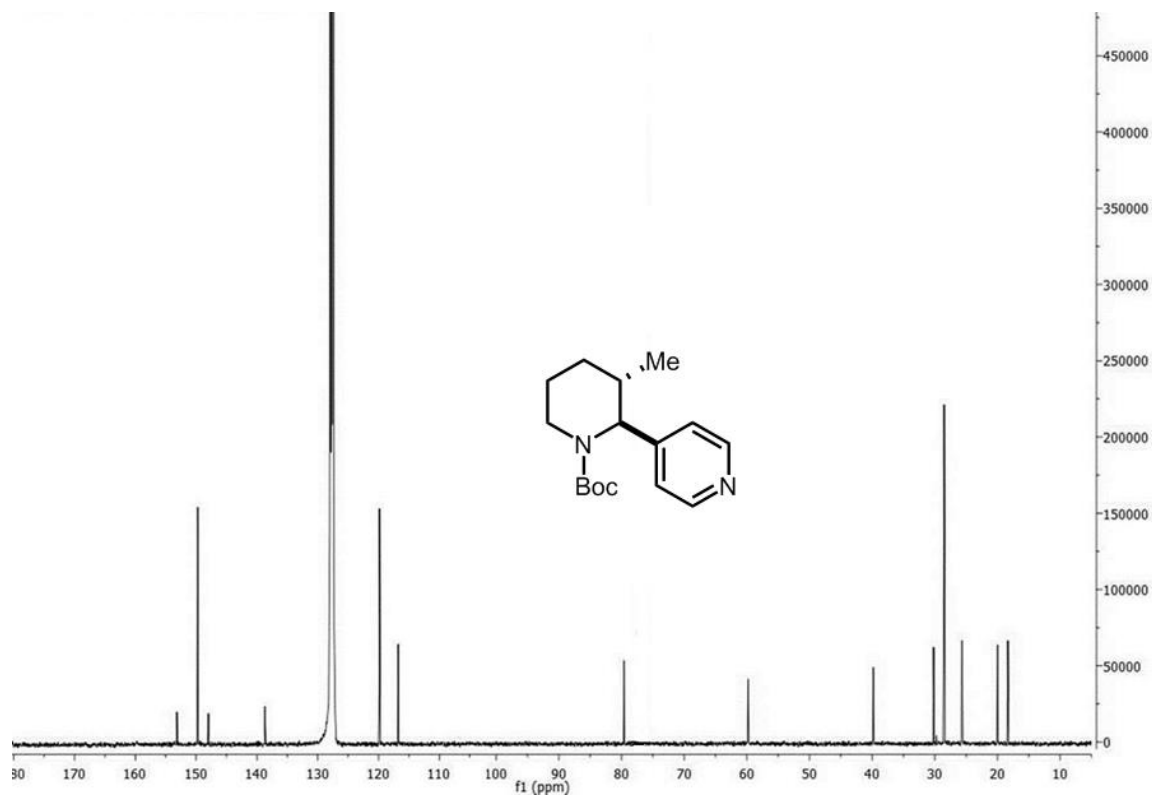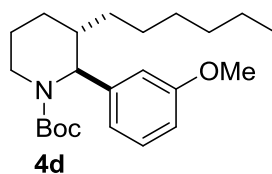

Prepared from **3c** (145 mg, 0.50 mmol), *n*-BuLi (2 equiv), HMPA (1.2 equiv), and MeOH (0.2 mL) using **General Procedure A**. Purification: Flash chromatography on silica eluting with hexane:EtOAc (50:50). Yield = 131 mg; 70%. <sup>1</sup>H NMR (400 MHz, CDCl<sub>3</sub>) δ 7.42 to 7.21 (2H, m), 6.96 to 6.81 (3H, m), 5.22 (1H, s, br), 4.12 to 4.08 (1H, dd), 3.86 (3H, s), 3.74 to 3.70 (1H, m), 2.82 to 2.76 (1H, t), 2.30 (1H, m), 1.73 to 1.30 (21H, m), 0.96 to 0.86 (3H, t). <sup>13</sup>C NMR (101 MHz, CDCl<sub>3</sub>) δ 159.8, 156.1, 142.6, 129.7, 112.9, 112.8, 79.4, 56.9, 55.3, 39.6, 35.3, 31.8, 31.4, 29.4, 28.4, 27.8, 23.9, 22.6, 20.0, 14.0. **HRMS-EI<sup>+</sup>** (*m/z*): calc'd for C<sub>23</sub>H<sub>37</sub>NO<sub>3</sub> 375.2773; found 375.2770.



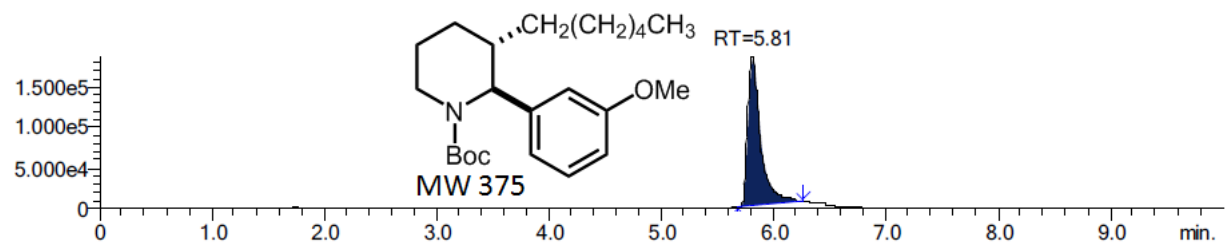**MS Spectrum**

Group#1 - MS Mass(376) Peak: 37, RT: 5.70 to 5.98 min

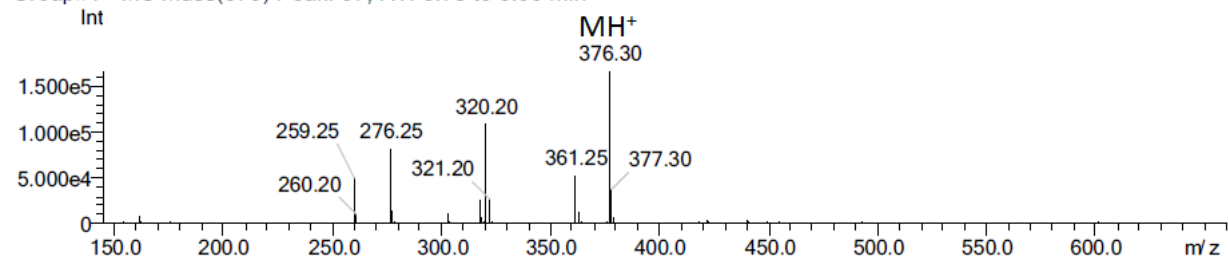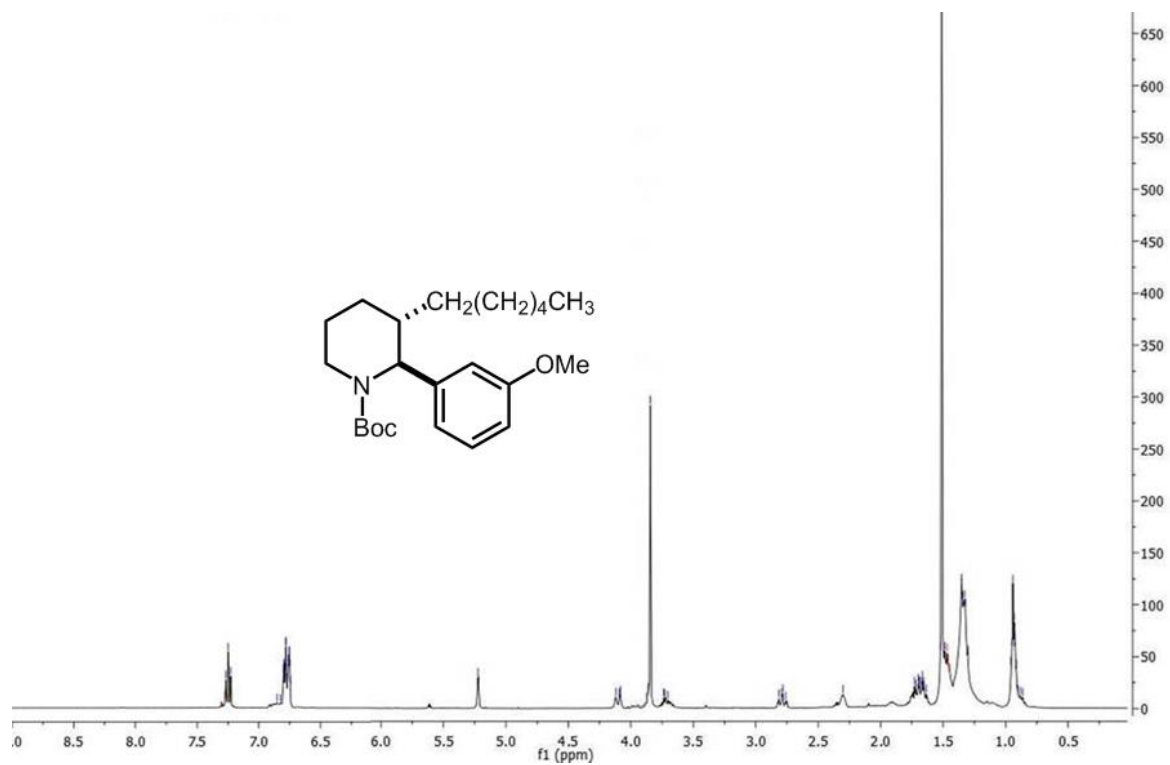

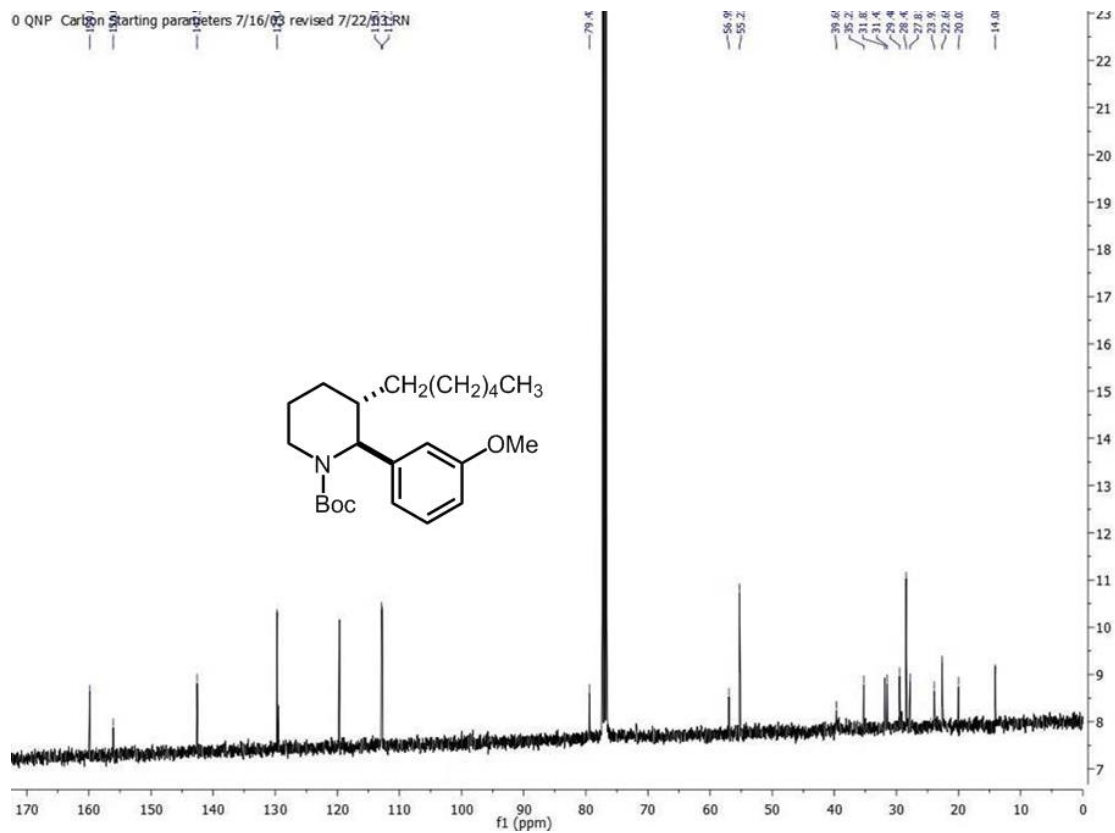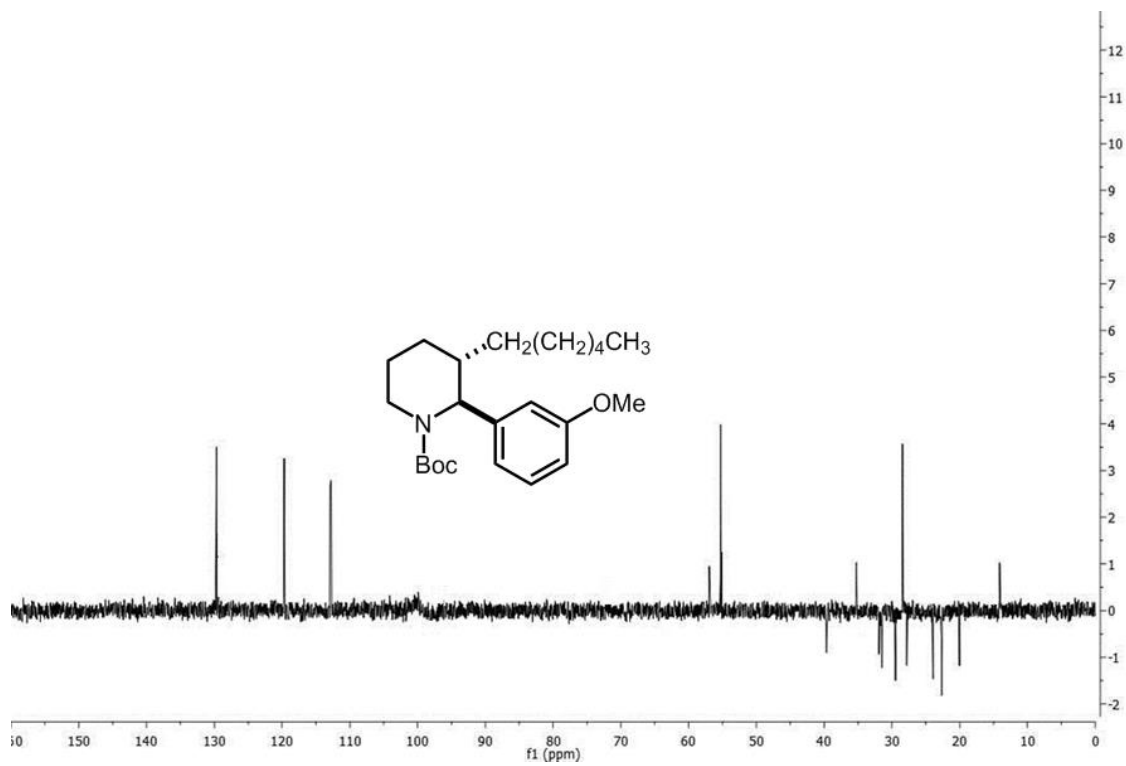

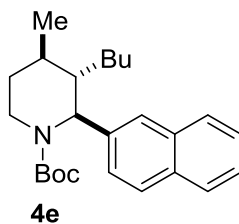

Prepared from **3j** (81 mg, 0.25 mmol) and *n*-BuLi (2 equiv) using **General Procedure A**. Purification: Flash chromatography on silica eluting with hexane:EtOAc (90:10). Yield = 76 mg; 80%.  $^1\text{H}$  NMR (400 MHz,  $\text{CDCl}_3$ )  $\delta$  8.02 to 7.41 (7H, m), 5.25 (1H, s, br), 4.01 to 3.95 (1H, dd), 3.47, to 3.40 (1H, t), 2.18 to 2.13 (1H, t), 1.93 to 1.85 (1H, m), 1.70 to 1.26 (18H, m), 1.00 to 0.93 (3H, t), 0.81 (3H, d).  $^{13}\text{C}$  NMR (101 MHz,  $\text{CDCl}_3$ )  $\delta$  156.3, 140.9, 133.4, 132.1, 127.9, 127.9, 127.5, 126.0, 125.4, 124.7, 124.1, 79.5, 57.0, 44.5, 38.2, 33.7, 31.6, 29.6, 28.4, 28.0, 23.0, 20.7, 14.2. **HRMS-EI<sup>+</sup>** ( $m/z$ ): Calcd. for  $\text{C}_{25}\text{H}_{35}\text{NO}_2$  [ $\text{M}$ ]<sup>+</sup> 381.2668; found, 381.2665.

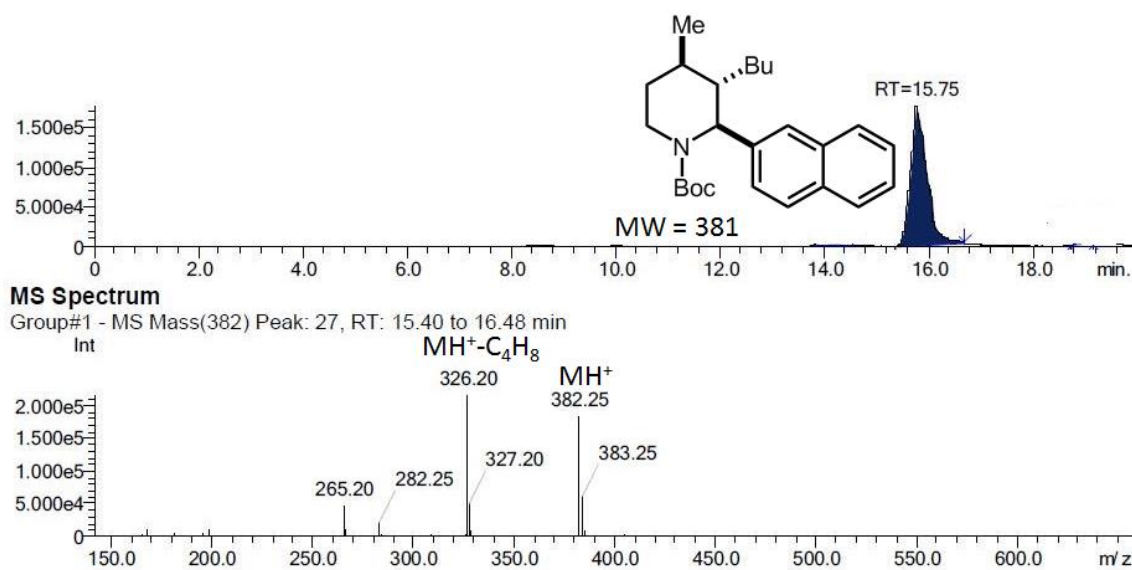



tkb-3-116A.3.fid  
AVB-400 ZBO Carbon Starting paramters 6/11/03 RN

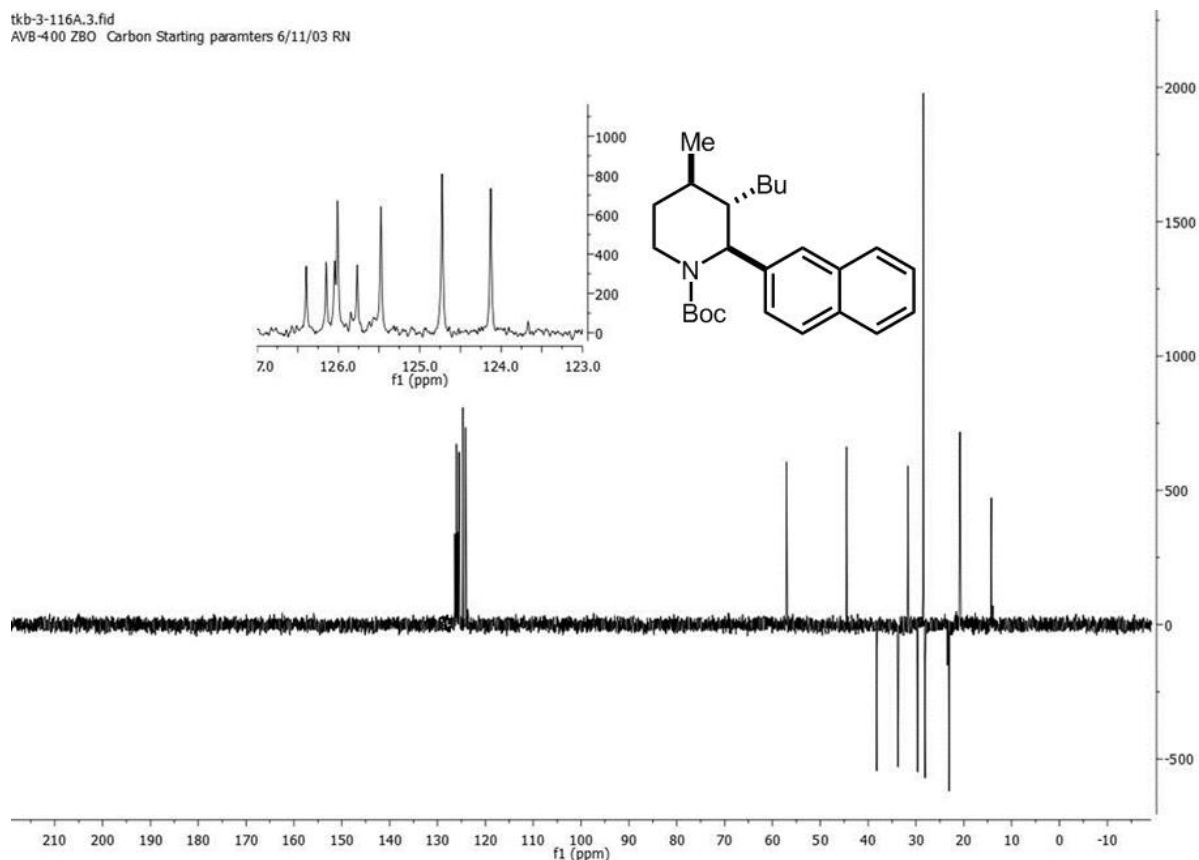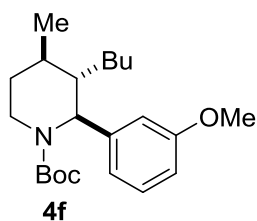

Prepared from **3k** (76 mg, 0.25 mmol) and *n*-BuLi (2 equiv) using **General Procedure A**. Purification: Flash chromatography on silica eluting with hexane:EtOAc (60:40). Yield = 68 mg; 75%.  $^1\text{H}$  NMR (400 MHz,  $\text{CDCl}_3$ )  $\delta$  7.12 to 6.93 (3H, m), 6.85 (1H, d), 5.08 (1H, s, br), 3.91 to 3.79 (4H, m), 3.35 to 3.08 (1H, dd), 2.05 to 1.98 (1H, t), 1.86 to 1.78 (1H), 1.63 to 1.20 (18H, m), 0.98 to 0.93 (3H, t), 0.83 (3H, d).  $^{13}\text{C}$  NMR (101 MHz,  $\text{CDCl}_3$ )  $\delta$  159.7, 156.2, 145.2, 129.2, 118.3, 112.1, 110.9, 79.4, 56.6, 55.1, 44.5, 38.2, 33.7, 31.6, 29.5, 28.4, 28.0, 23.0, 20.7, 14.1. **HRMS-EI<sup>+</sup>** (*m/z*): Calcd. for  $\text{C}_{25}\text{H}_{35}\text{NO}_3$  [ $\text{M}$ ]<sup>+</sup> 361.2617; found, 361.2614.

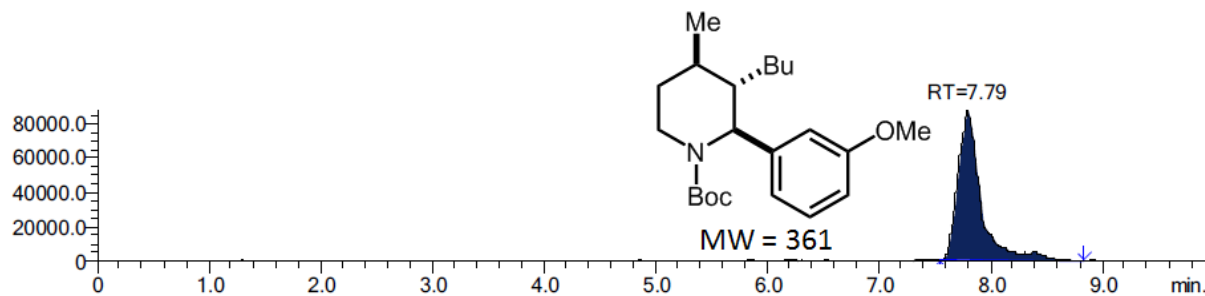

**MS Spectrum**

Group#1 - MS Mass(362) Peak: 27, RT: 7.57 to 8.26 min

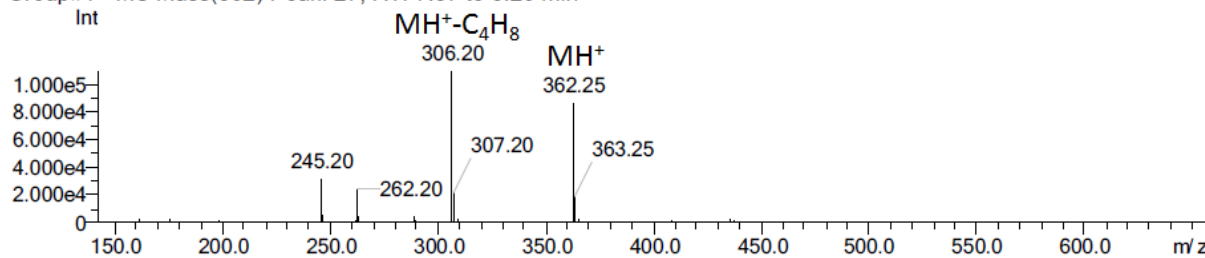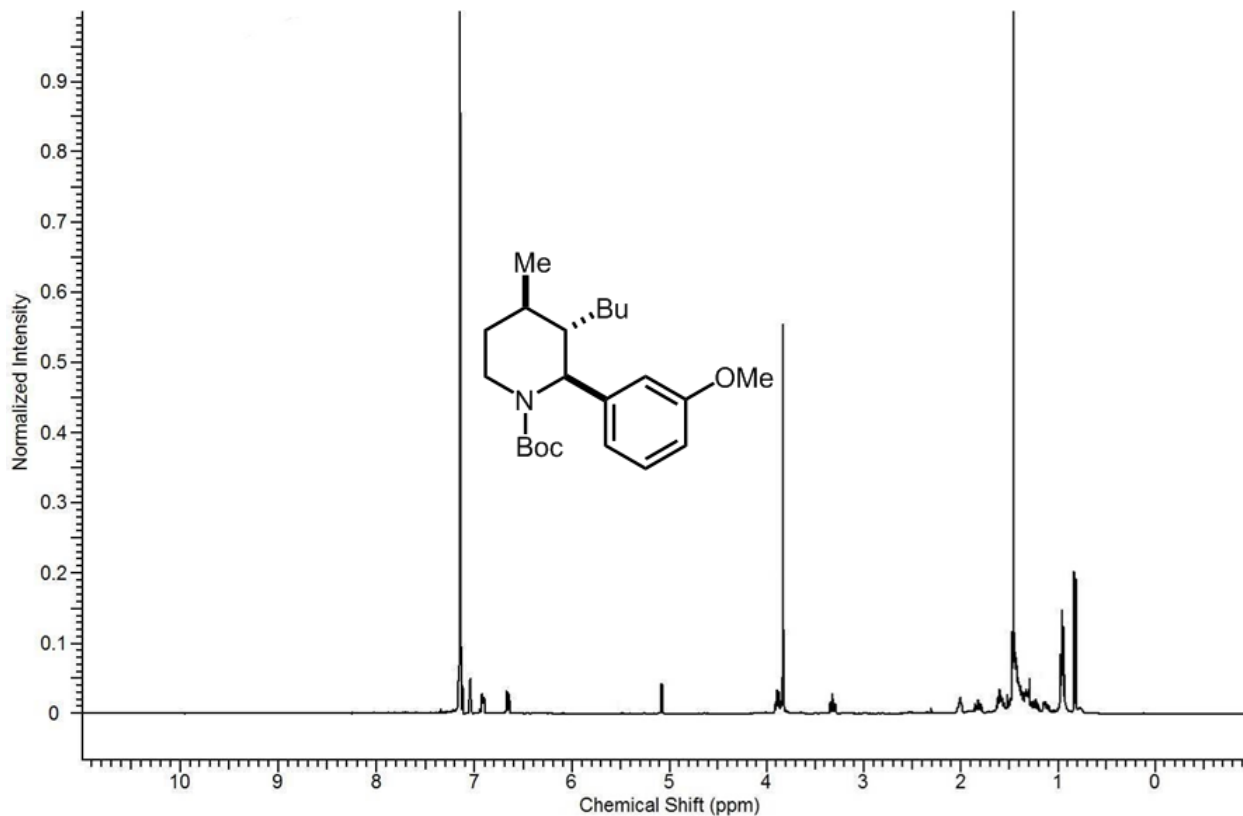

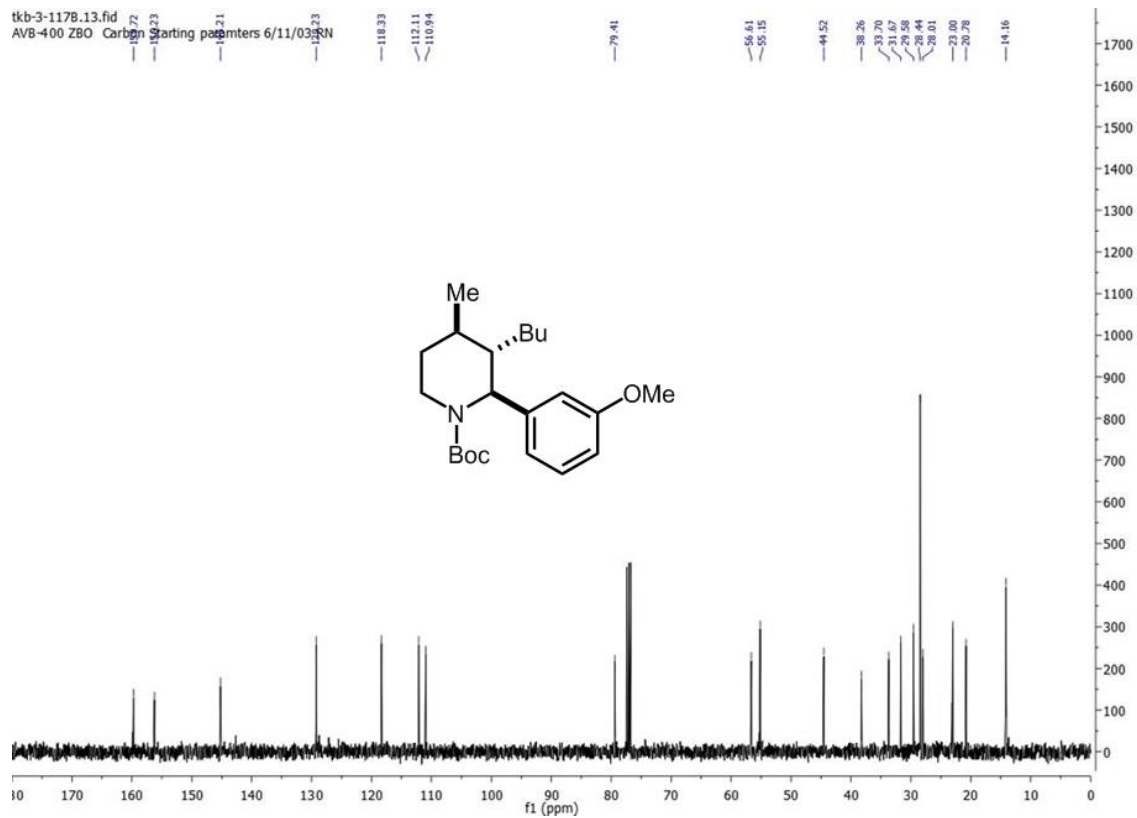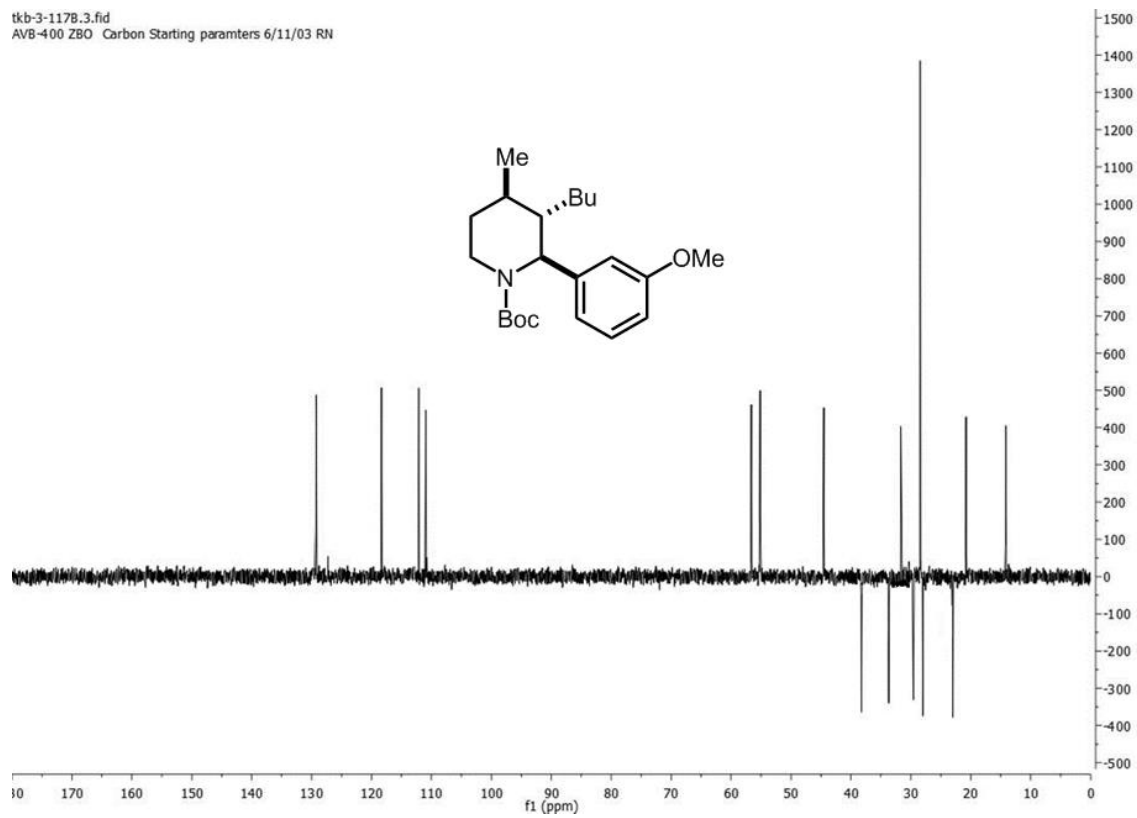

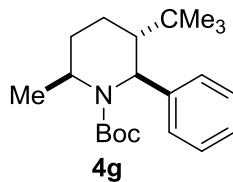

Prepared from **31** (68 mg, 0.25), and *tert*-BuLi in pentane (2.0 equiv), and MeOH (0.5 mL) using **General Procedure A**. Purification: Flash chromatography on silica eluting with hexane:EtOAc (90:10). Yield = 73 mg, 88%.  $^1\text{H}$  NMR (400 MHz,  $\text{CDCl}_3$ )  $\delta$  7.54 to 7.51 (2H, m), 7.35 to 7.30 (2H, m), 7.25 to 7.21 (1H, t), 5.55 (1H, s, br), 3.86 (1Hs, br), 2.44 to 2.39 (1H, t), 1.87 to 0.87 (25H, m).  $^{13}\text{C}$  NMR (101 MHz,  $\text{CDCl}_3$ )  $\delta$  156.1, 145.3, 127.9, 127.6, 126.3, 79.3, 77.4, 77.3, 77.1, 76.7, 52.4, 50.4, 46.1, 34.1, 28.8, 28.6, 26.9, 21.6. **HRMS- $\text{EI}^+$**  ( $m/z$ ): Calcd. for  $\text{C}_{21}\text{H}_{33}\text{NO}_2$   $[\text{M}]^+$  331.2511; found, 331.2505.

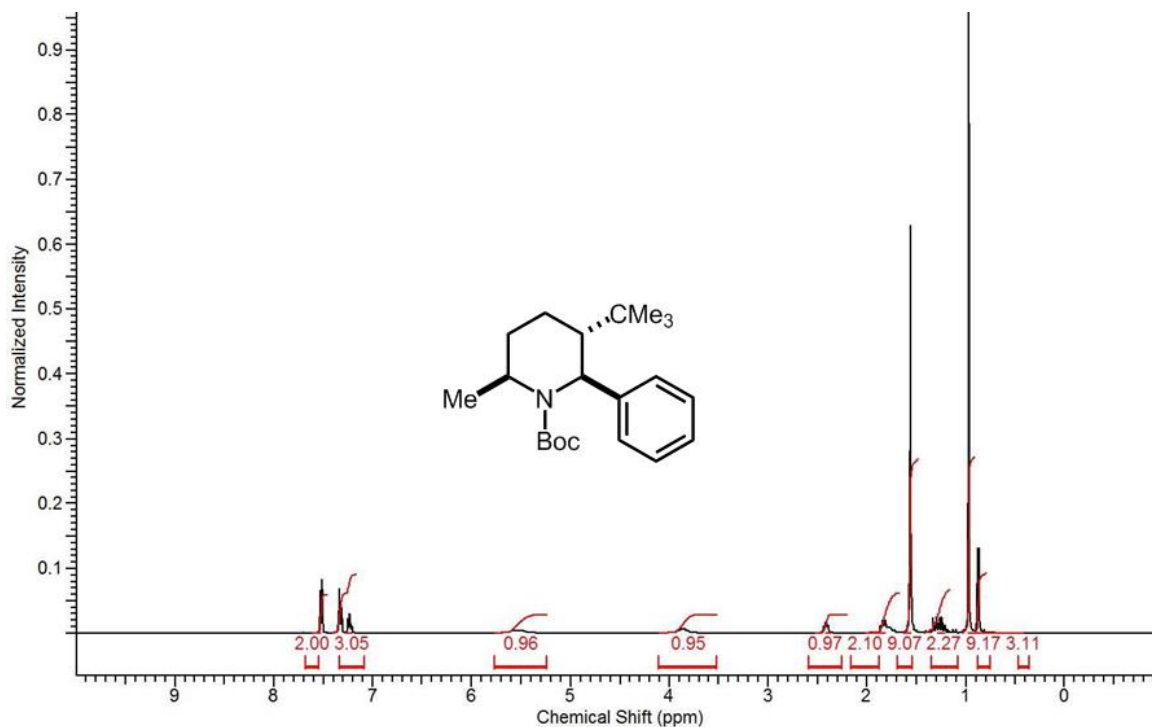



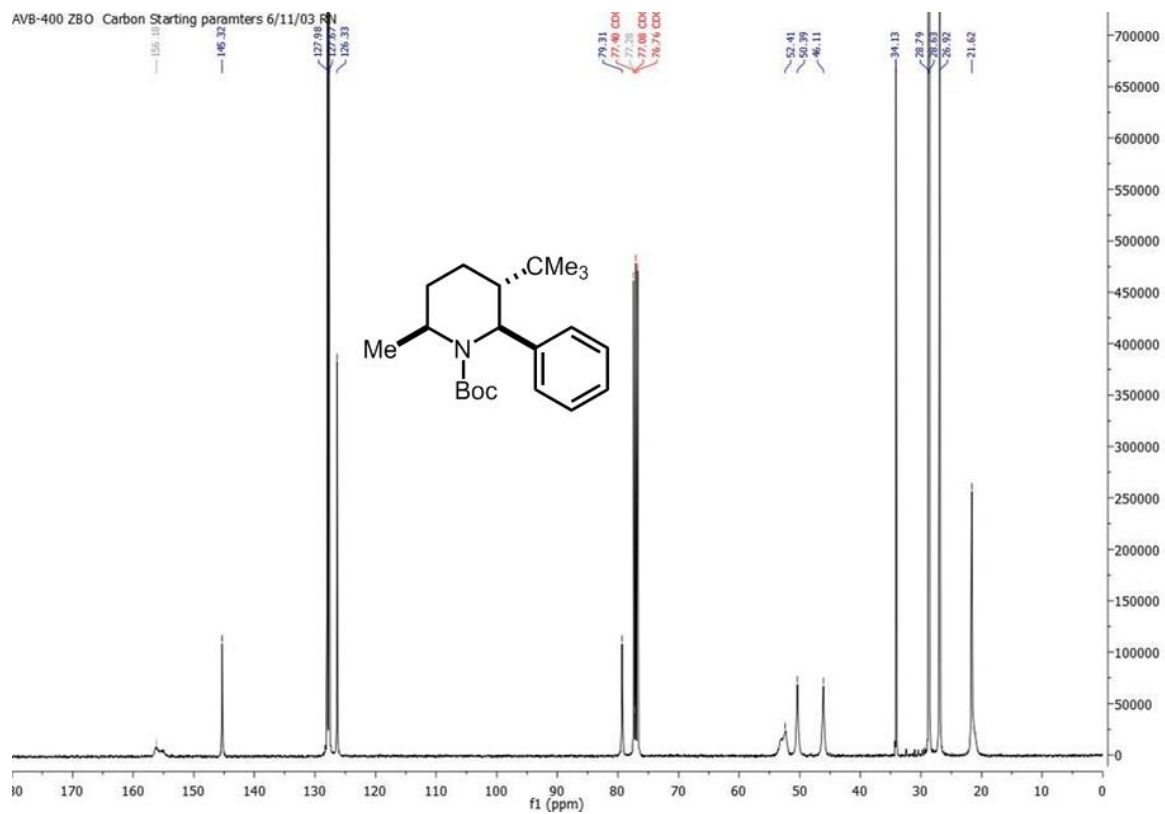

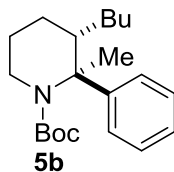

Prepared from **3b** (129.5 mg, 0.5 mmol), *n*-BuLi (2.0 equiv), HMPA (1.2 equiv) and Me<sub>2</sub>SO<sub>4</sub> (3 equiv) using **General Procedure B**. Purification: Flash chromatography on silica eluting with hexane:EtOAc (95:5). Yield = 54 mg; 69%. <sup>1</sup>H NMR (400 MHz, CDCl<sub>3</sub>) δ 7.47 to 7.22 (5H, m), 3.82 to 3.75 (1H, dd), 3.69 to 3.58 (1H, dd), 1.82 to 0.75 (23H, m), 0.70 (3H, t). **HRMS-EI<sup>+</sup>** (*m/z*): calc for C<sub>21</sub>H<sub>33</sub>NO<sub>2</sub> 331.2511, found 331.2505.

### MS Chromatogram

Group#1 Scan(+) ESI : 332

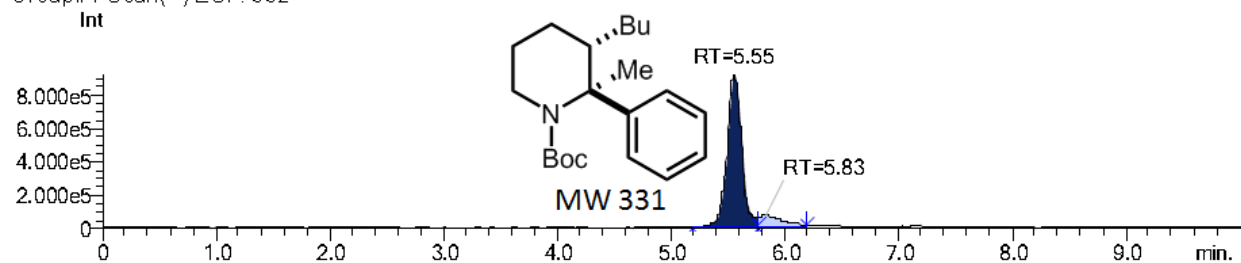

### MS Spectrum

Group#1 - MS Mass(332) Peak: 34, RT: 5.39 to 5.75 min

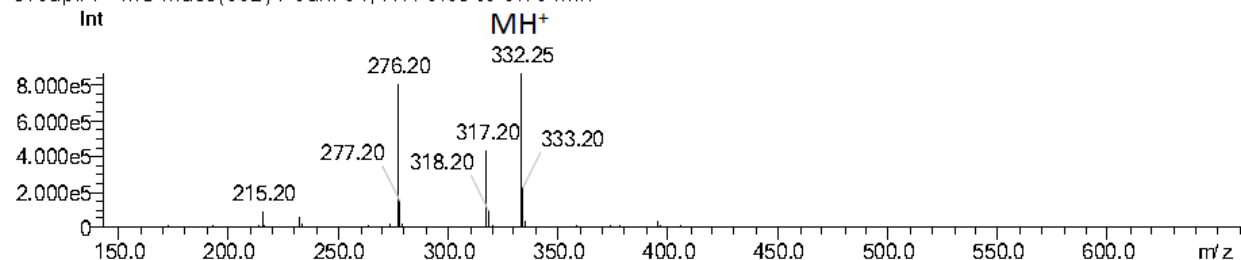

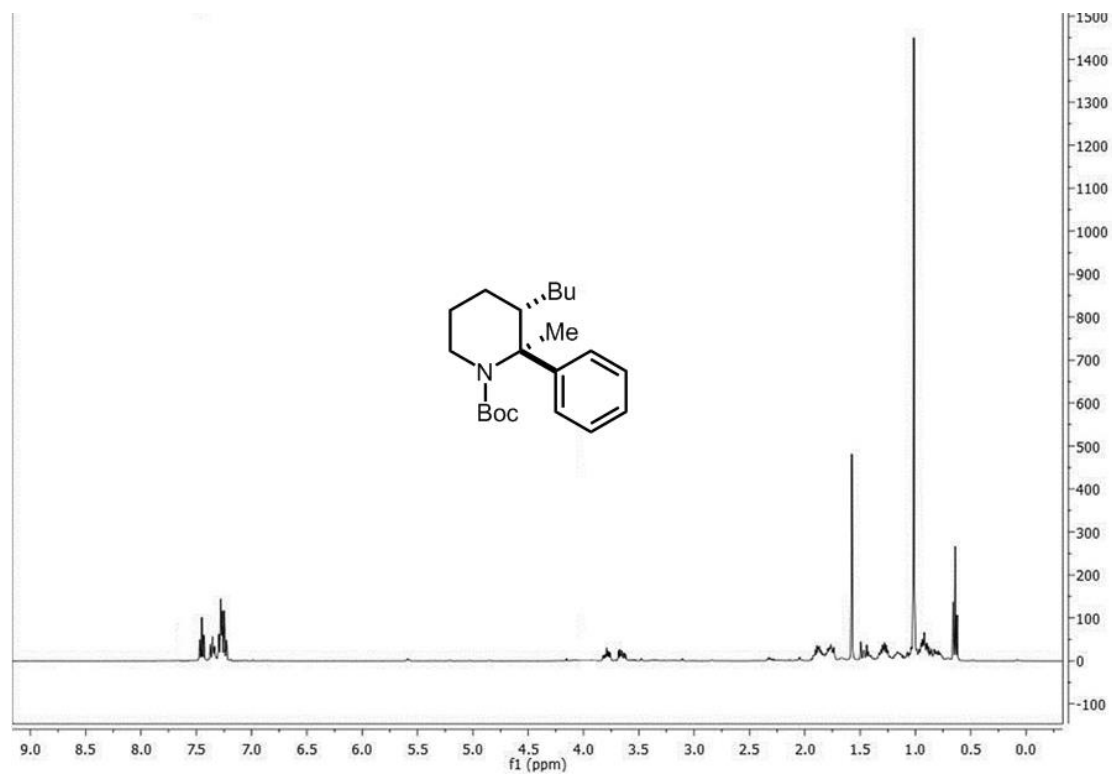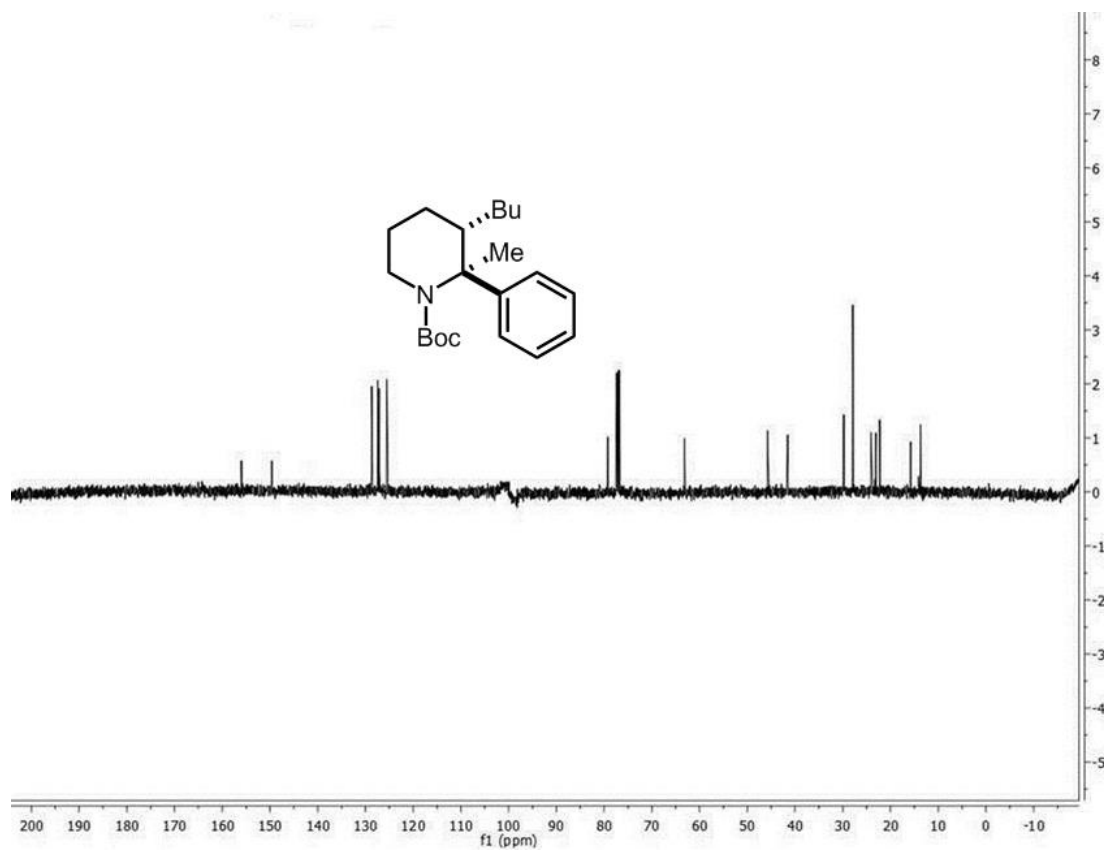

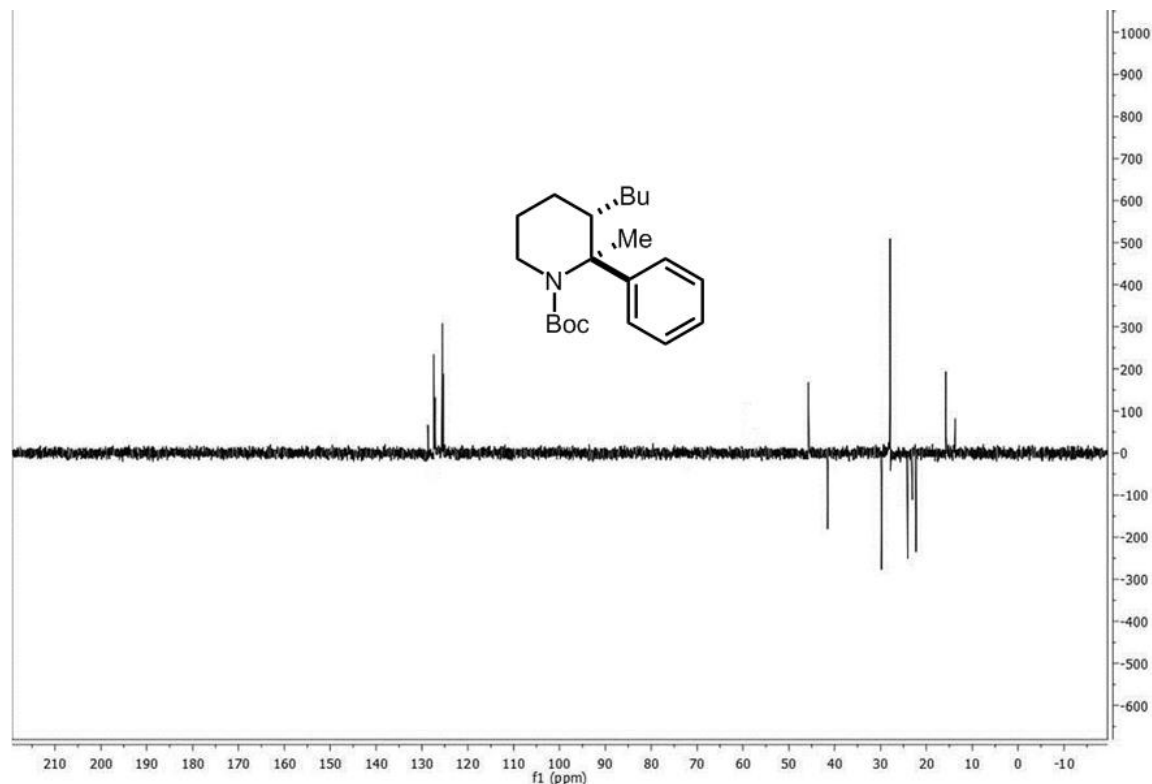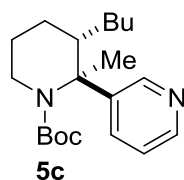

Prepared from enecarbamate **3h** (130 mg, 0.5 mmol) and  $\text{Me}_2\text{SO}_4$  (3 equiv) using **General Procedure B**. Purification: Flash chromatography on silica eluting with Hexane/EtOAc (80:20 to 30:70). Yield = 136 mg; 82%.  $^1\text{H}$  NMR (400 MHz,  $\text{C}_6\text{D}_6$ )  $\delta$  8.79 (1H, s), 8.46 (1H, d), 7.27 to 7.22 (1H, t), 6.77 to 6.72 (1H, t), 3.85 to 3.78 (1H, dd), 3.55 to 3.47 (1H, dd), 1.57 to 0.58 (26H, m).  $^{13}\text{C}$  NMR (101 MHz,  $\text{C}_6\text{D}_6$ )  $\delta$  153.9, 148.7, 147.9, 138.3, 137.2, 132.6, 123.0, 80.5, 62.7, 46.2, 41.8, 29.7, 27.7, 24.2, 23.3, 22.2, 14.8, 13.5. **HRMS-EI<sup>+</sup>** ( $m/z$ ): calc for  $\text{C}_{20}\text{H}_{32}\text{N}_2\text{O}_2$  332.2464, found 332.2469.

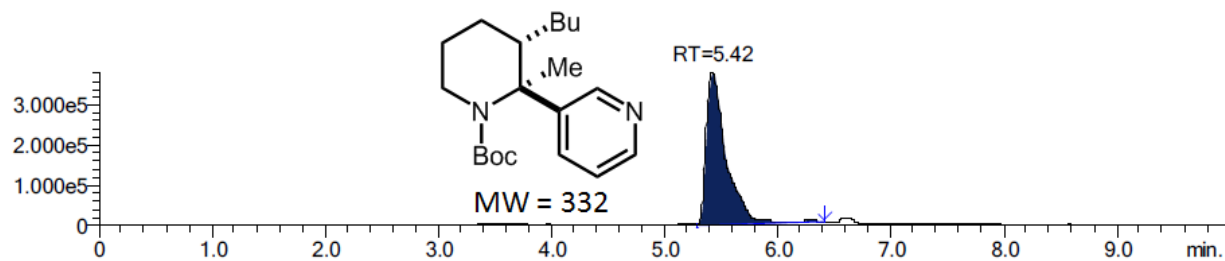

**MS Spectrum**

Group#1 - MS Mass(333) Peak: 35, RT: 5.29 to 6.00 min

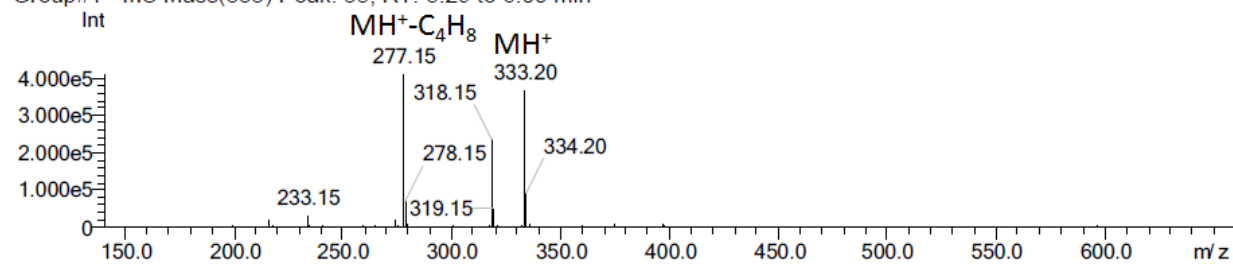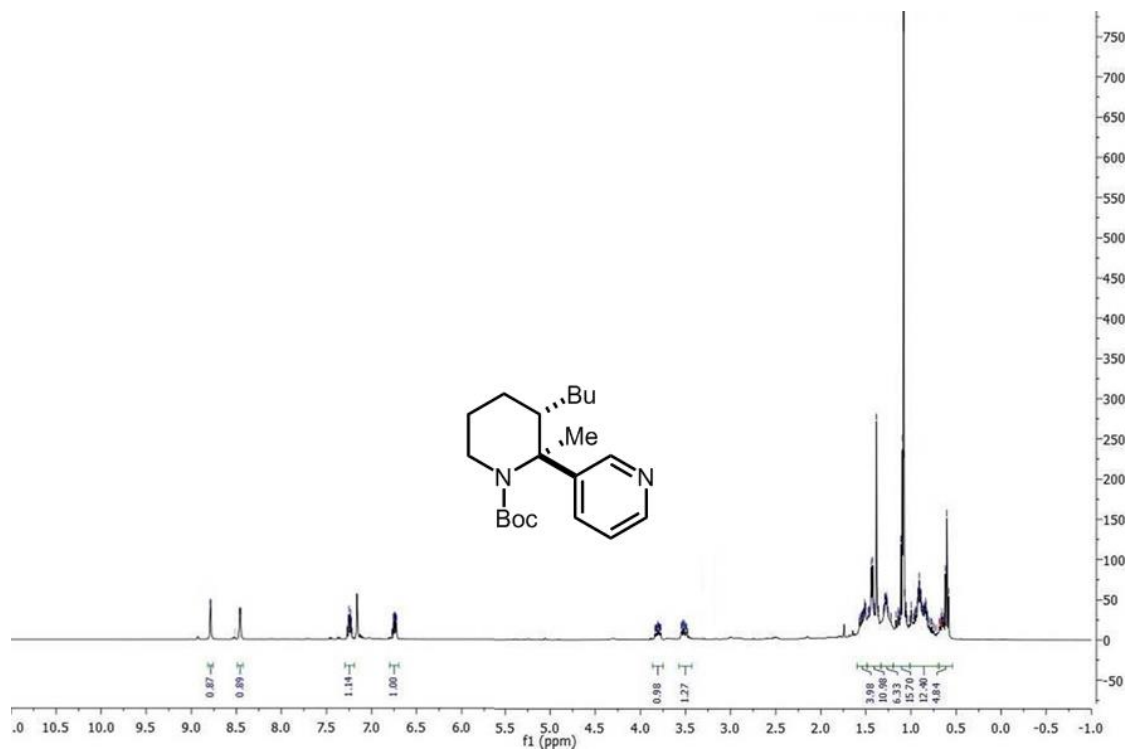

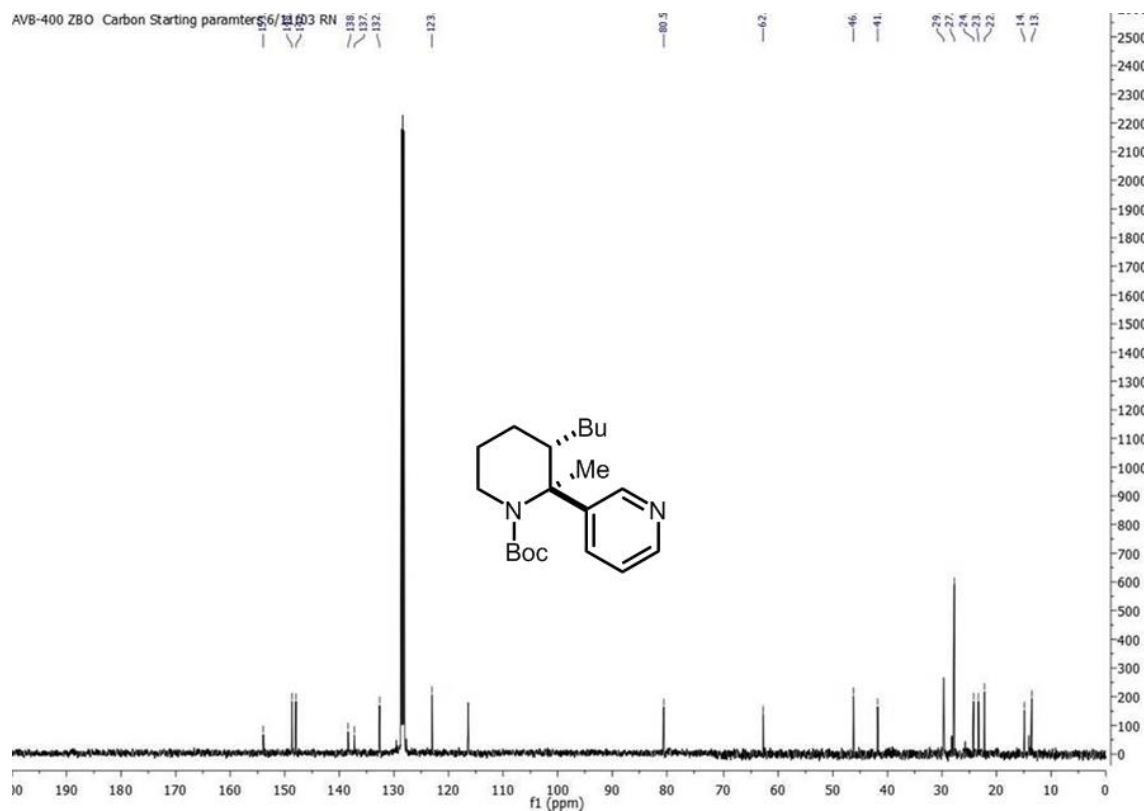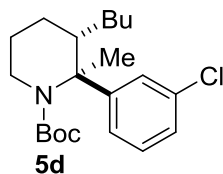

Prepared from **3d** (293 mg, 1.0 mmol) and Me<sub>2</sub>SO<sub>4</sub> (3 equiv) using **General Procedure B**. Purification: Flash chromatography on silica eluting with hexane:EtOAc (95:5). Yield = 256 mg; 70%. <sup>1</sup>H NMR (400 MHz, C<sub>6</sub>D<sub>6</sub>) δ 7.47 (1H, s), 7.07 to 6.81 (3H, m), 3.88 to 3.80 (1H, dd), 3.51 to 3.40 (1H, dd), 1.62 to 0.55 (26H, m). <sup>13</sup>C NMR (101 MHz, C<sub>6</sub>D<sub>6</sub>) δ 155.3, 152.5, 133.6, 128.7, 126.1, 125.5, 123.8, 78.9, 62.8, 46.2, 41.8, 29.7, 29.9, 27.8, 24.2, 23.3, 22.2, 14.9, 13.5. **HRMS-EI<sup>+</sup>** (*m/z*): calc for C<sub>21</sub>H<sub>32</sub>ClNO<sub>2</sub> 365.2122, found 365.2125.

tcb-3-088A.1.fid  
AVB-400 ZBO Proton starting parameters. 6/11/03 RN

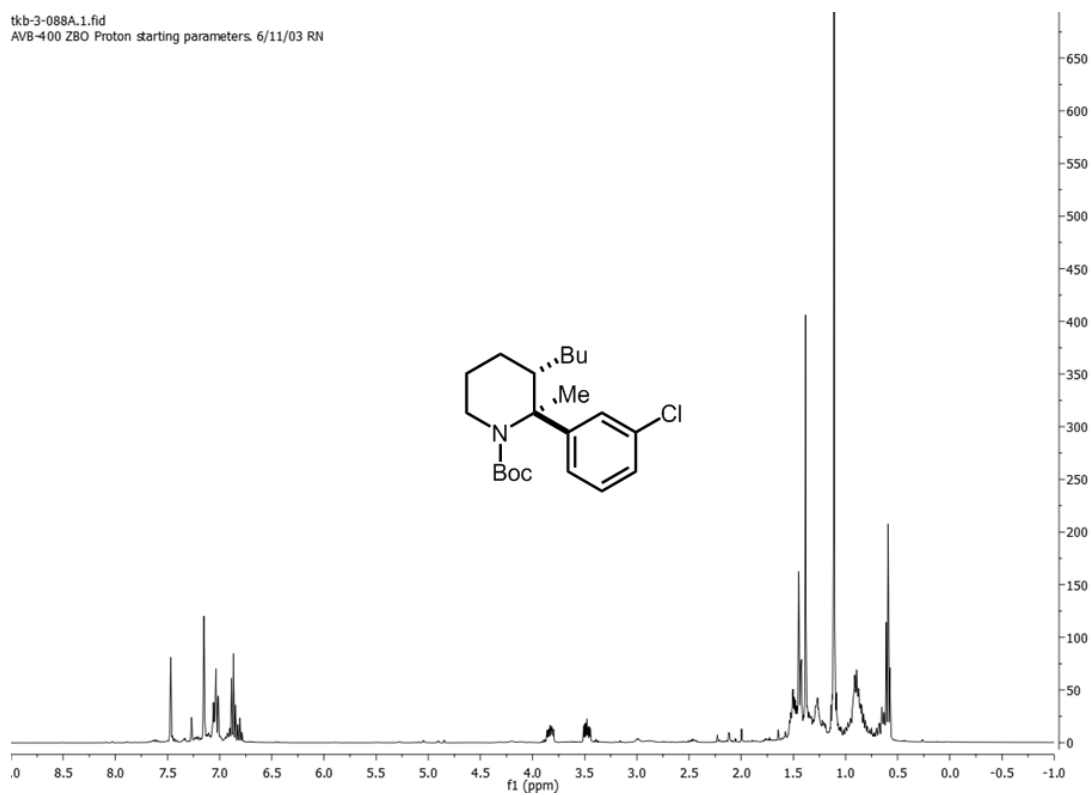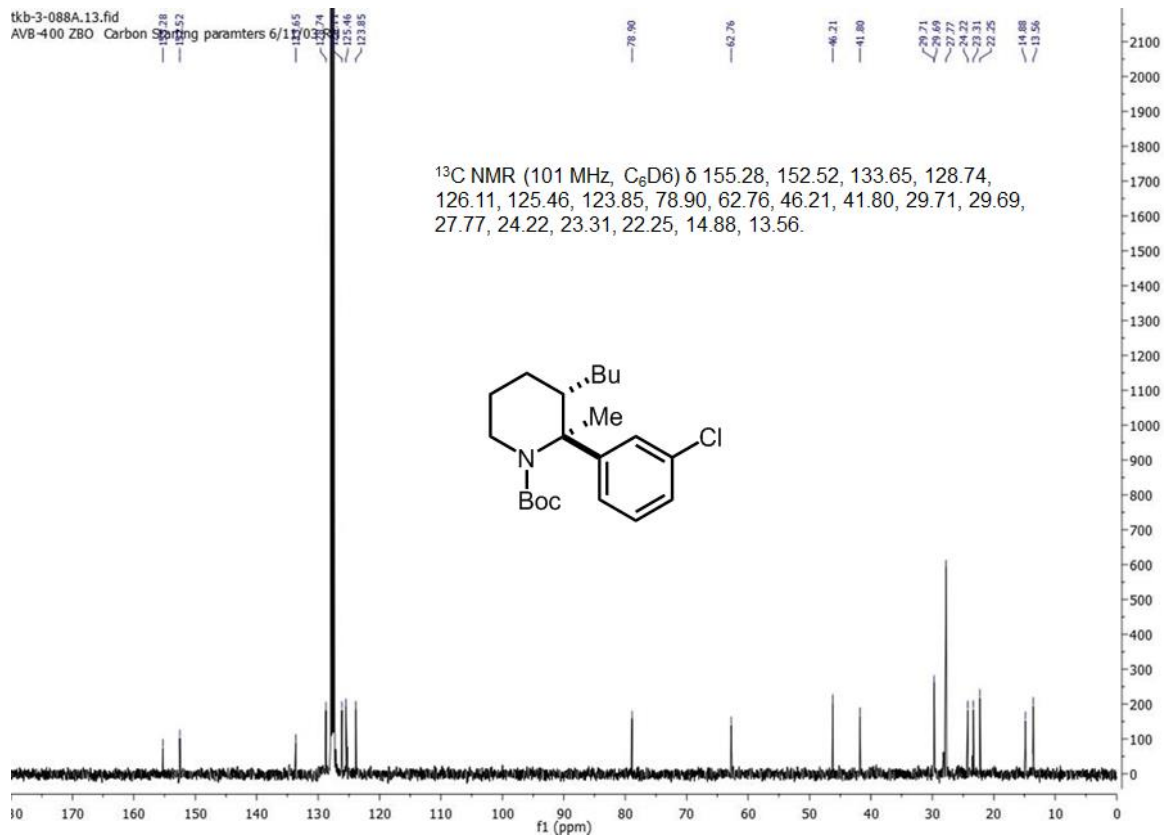

tkb-3-088A.3.fid  
AVB-400 ZBO Proton starting parameters. 6/11/03 RN

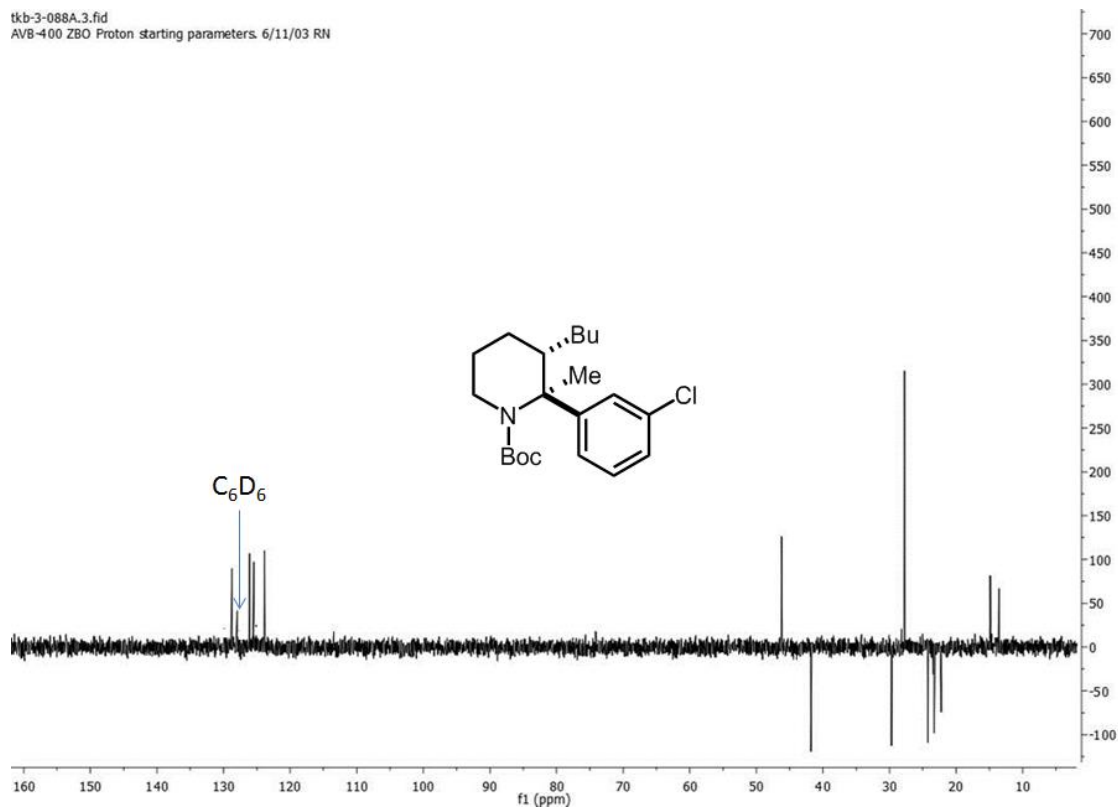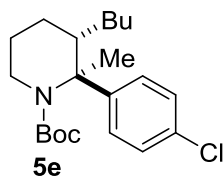

Prepared from **3e** (146.5 mg, 0.50 mmol), *n*-BuLi (1.1 equiv), and Me<sub>2</sub>SO<sub>4</sub> (3 equiv) using **General Procedure B**. Purification: Flash chromatography on silica eluting with hexane:EtOAc (95:5). Yield = 137 mg; 75%. <sup>1</sup>H NMR (400 MHz, C<sub>6</sub>D<sub>6</sub>) δ 7.17 to 7.00 (4H, m), 3.84 to 3.77 (1H, dd), 3.60 to 3.45 (1H, dd), 1.89 to 0.54 (26H, m). <sup>13</sup>C NMR (101 MHz, C<sub>6</sub>D<sub>6</sub>) δ 155.3, 148.6, 131.0, 128.6, 127.1, 78.9, 65.5, 46.1, 41.7, 29.7, 29.7, 27.7, 24.1, 23.2, 22.2, 15.0, 13.6. **HRMS-EI<sup>+</sup>** (*m/z*): calc for C<sub>21</sub>H<sub>32</sub>ClNO<sub>2</sub> 365.2122, found 365.2125.



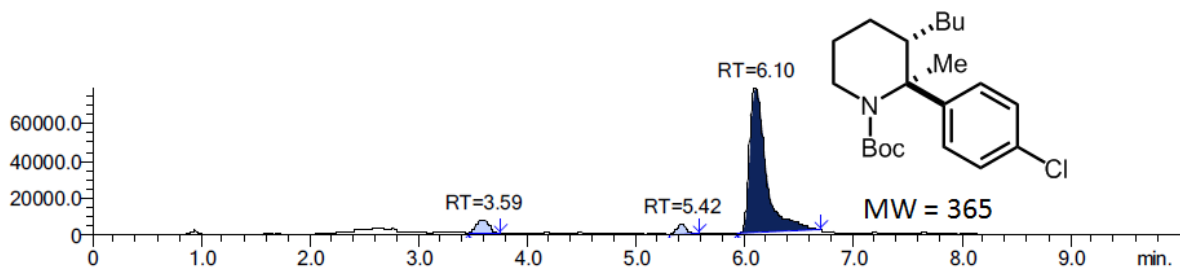

**MS Spectrum**

Group#1 - MS Mass(366) Peak: 43, RT: 5.97 to 6.72 min

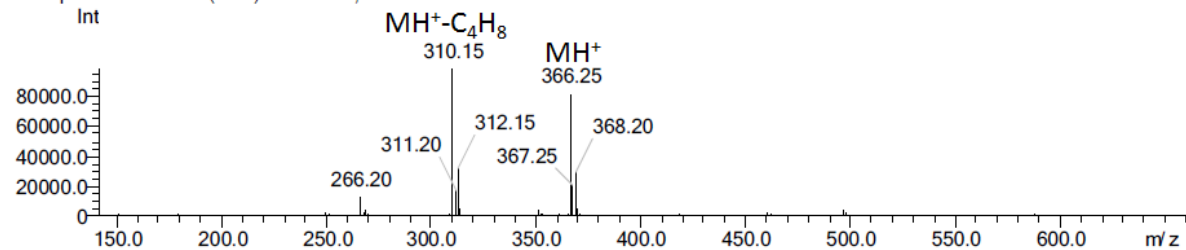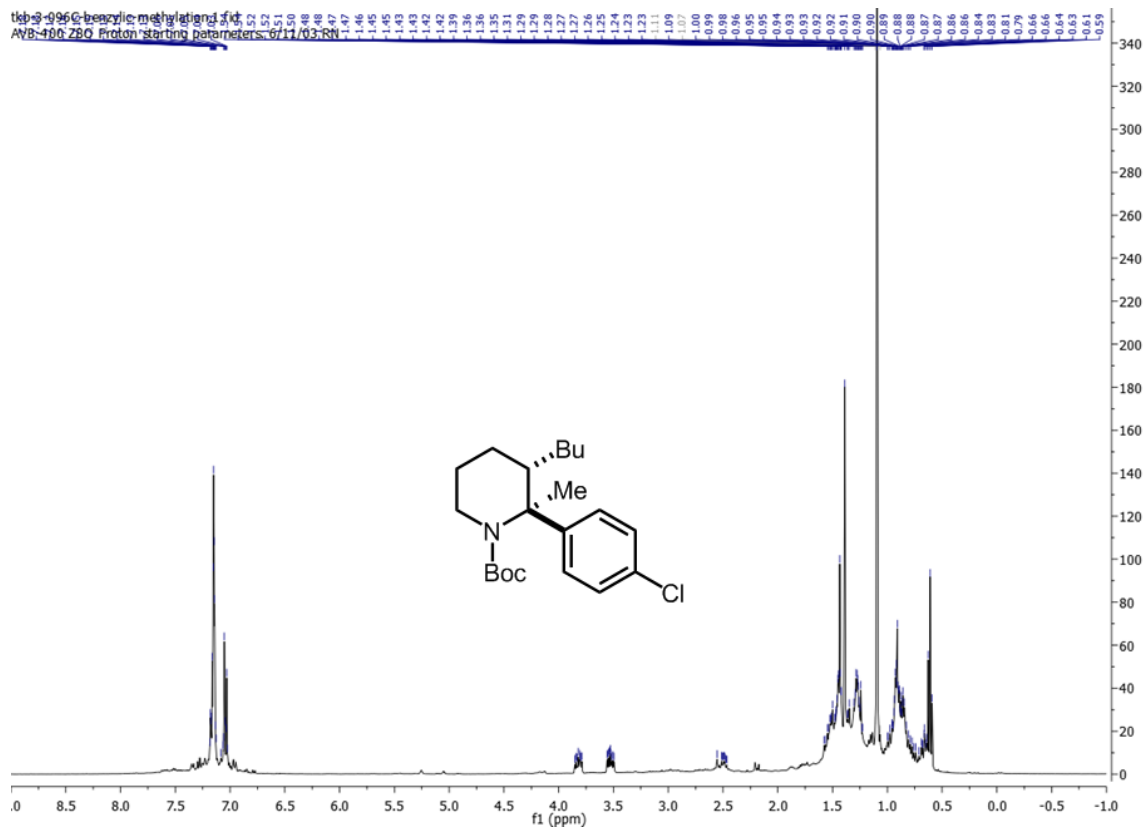

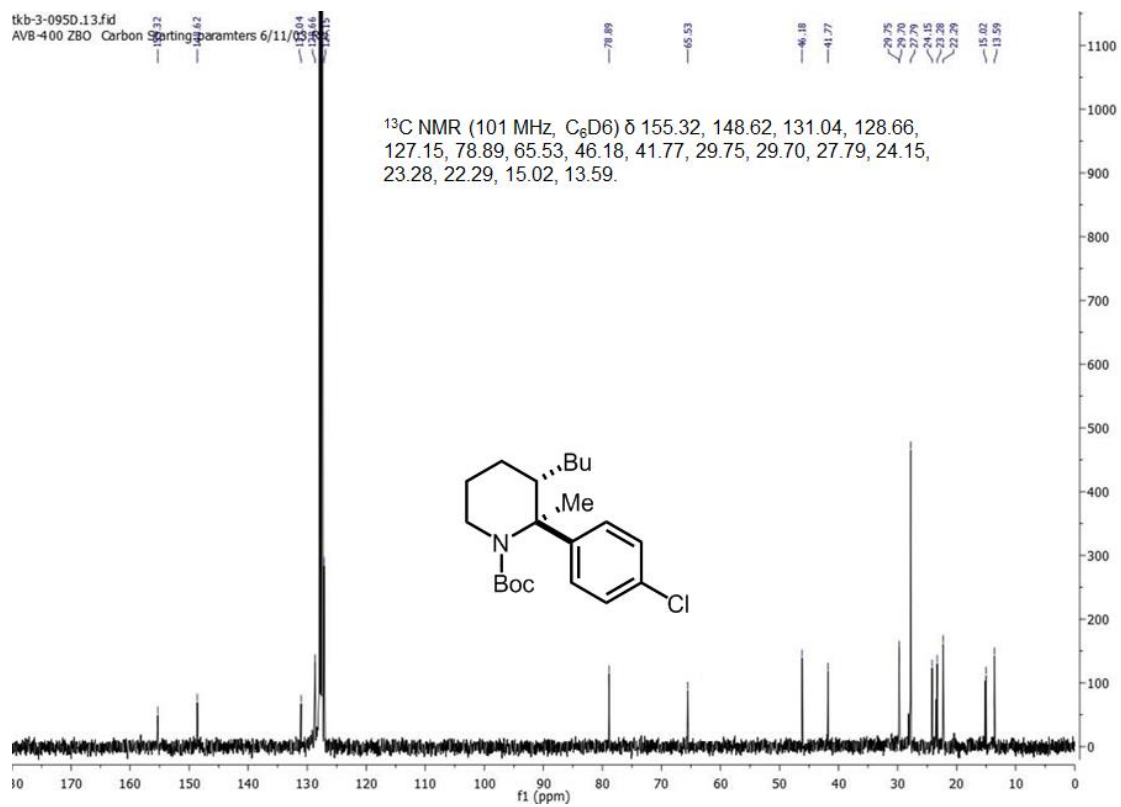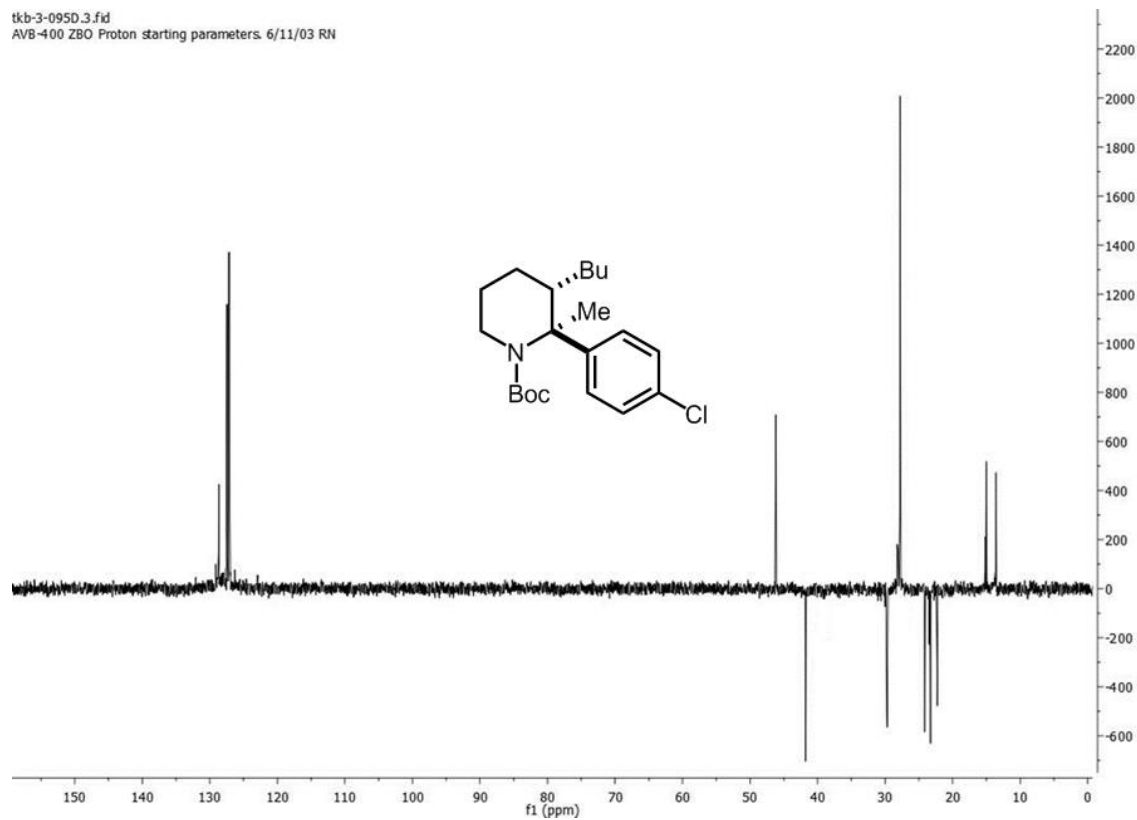

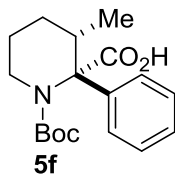

Prepared from **3b** (129.5 mg, 0.5 mmol), MeLi (3.0 equiv), HMPA (1.2 equiv) and dry ice (6 equiv) using **General Procedure B**. Purification: Flash chromatography on silica eluting with hexane:EtOAc (80:20). Yield = 113 mg; 71%.  $^1\text{H}$  NMR (400 MHz,  $\text{CDCl}_3$ )  $\delta$  = 8.56 (1H, br), 7.60 to 7.57 (2H, m), 7.28 to 7.23 (2H, m), 7.18 (1H, t), 4.42 (1H, br), 4.13 (1H, br), 2.23 to 0.93 (17H, m)  $^{13}\text{C}$  NMR (101 MHz,  $\text{CDCl}_3$ )  $\delta$  = 172.7, 156.3, 138.3, 127.8, 127.5, 126.8, 80.5, 61.0, 42.5, 28.1, 23.7, 18.9, 14.7, 14.1. **HRMS-EI<sup>+</sup>** ( $m/z$ ): calc'd for  $\text{C}_{18}\text{H}_{25}\text{NO}_4$  319.1714, found 319.1717.

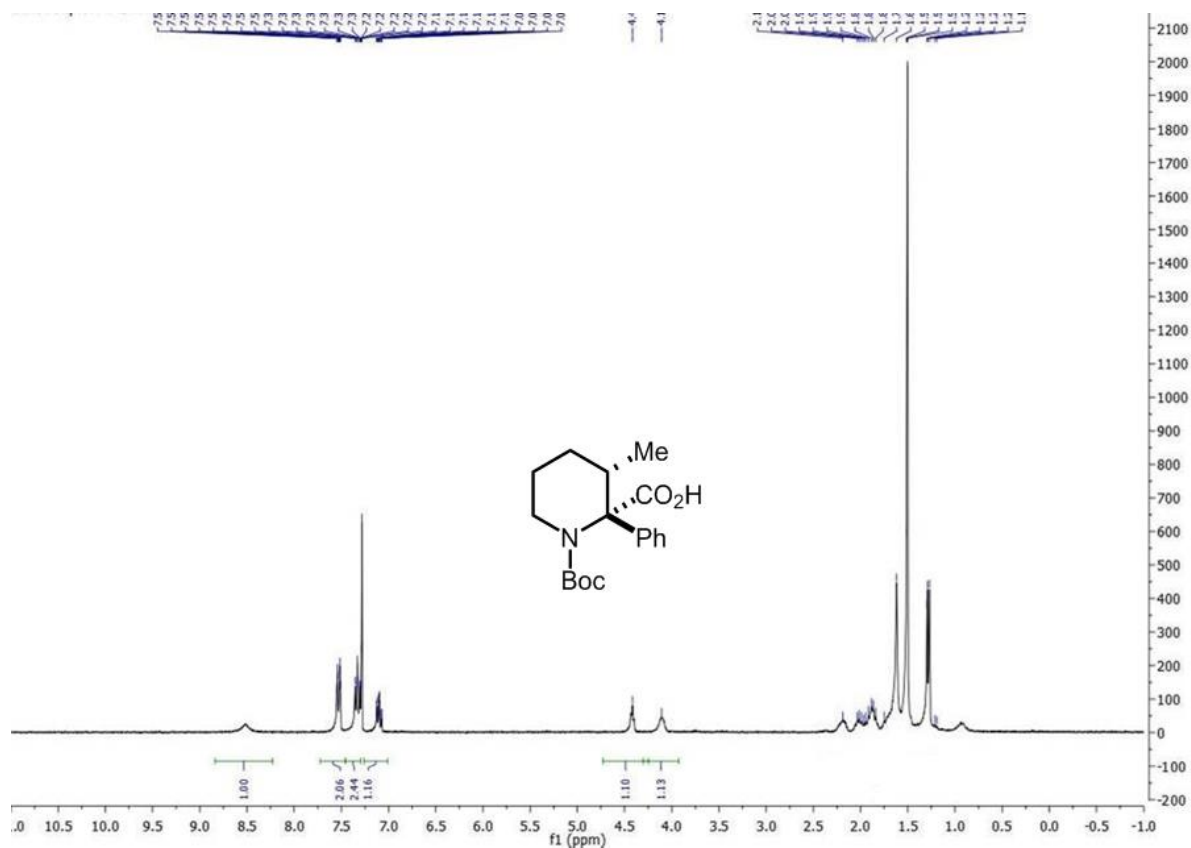

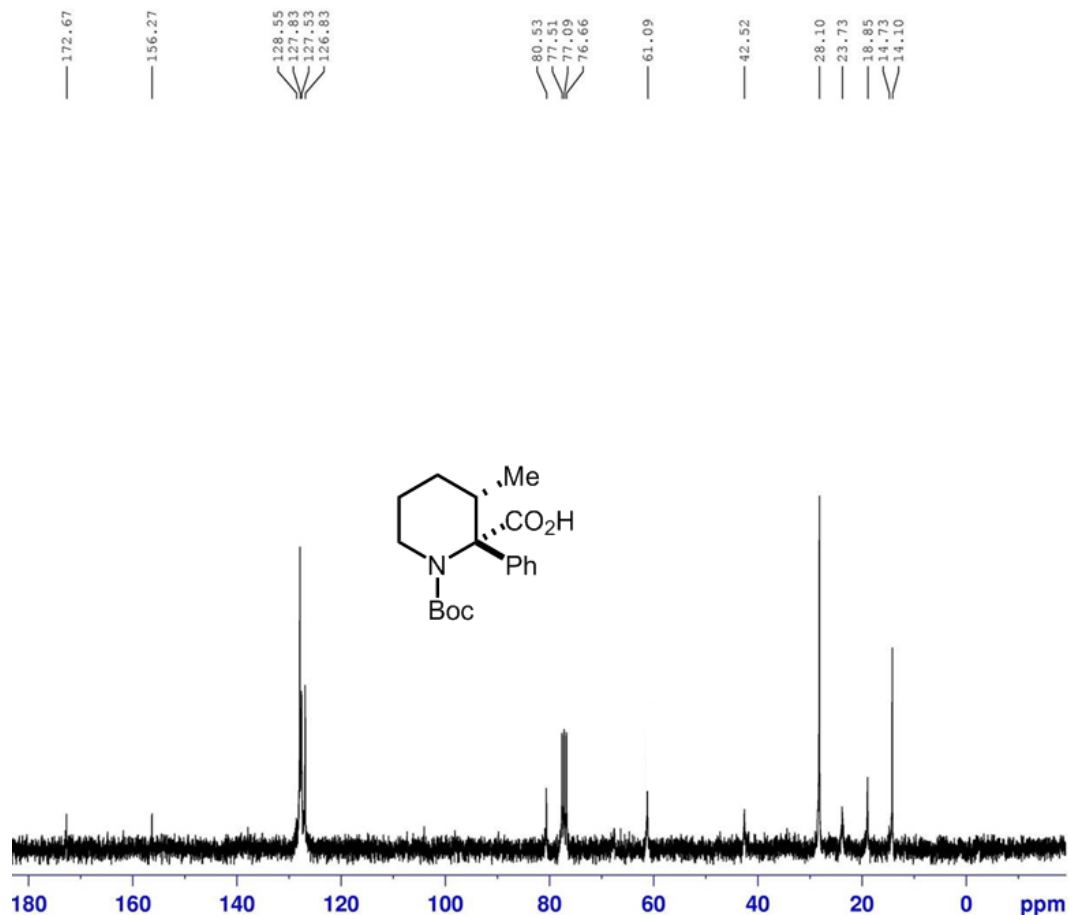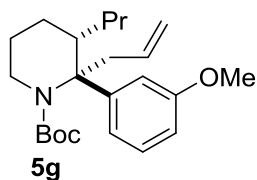

To an oven-dried, septum-capped, round-bottomed flask equipped with a stir bar was added a solution of **3c** (289 mg, 1.0 equiv) in THF (10 mL) nitrogen, in the presence of TMEDA (1.2 equiv). The mixture was cooled to  $-78\text{ }^{\circ}\text{C}$  and *n*-propyllithium (3 equiv) was added slowly. After 5 min at this temperature, the solution was transferred to a bath at  $0\text{ }^{\circ}\text{C}$  and stirred for 10 min. After complete consumption of the starting material (as judged by LCMS and TLC), the solution was returned to the bath at  $-78\text{ }^{\circ}\text{C}$  and a solution of  $\text{ZnCl}_2$  (1.3 mL, 1.0 M in THF, 1.3 equiv) was added slowly. After 30 min, a solution of  $\text{CuCN}\cdot 2\text{LiCl}$  [prepared from CuCN (1.2 equiv) and LiCl (2.5 equiv)] in THF (1.0 mL) was added. After 30 min, allyl bromide (3 equiv) was added. The mixture was allowed to stir for 10 h at this temperature prior to the addition of MeOH (0.2 mL) and warming to room temperature. A solution of  $\text{NH}_4\text{Cl}$  (5 mL) was added and

the aqueous layer was extracted with Et<sub>2</sub>O. The combined organic layers were dried over Na<sub>2</sub>SO<sub>4</sub> and evaporated to give the crude product. **Purification:** Flash chromatography on silica eluting with hexane-EtOAc (90:10). Yield = 243 mg, 65%. <sup>1</sup>H NMR (400 MHz, CDCl<sub>3</sub>) δ 7.21 to 7.12 (3H, m), 6.75 (1H, d), 5.96 to 5.82 (1H, m), 5.08 to 5.01 (2H, m), 3.84 to 3.70 (1H, m), 3.68 (3H, s), 3.14 to 2.67 (3H, m), 1.98 to 1.20 (18H, m), 0.86 to 0.82 (3H, t). <sup>13</sup>C NMR (101 MHz, CDCl<sub>3</sub>) δ 159.8, 156.0, 142.6, 129.7, 129.4, 119.9, 119.1, 112.9, 111.8, 79.4, 63.2, 55.2, 35.2, 31.8, 31.4, 29.5, 28.4, 27.8, 23.9, 20.0, 14.1. **HRMS-EI<sup>+</sup>** (*m/z*): calc'd for C<sub>23</sub>H<sub>35</sub>NO<sub>3</sub> 373.2617, found 373.2620.

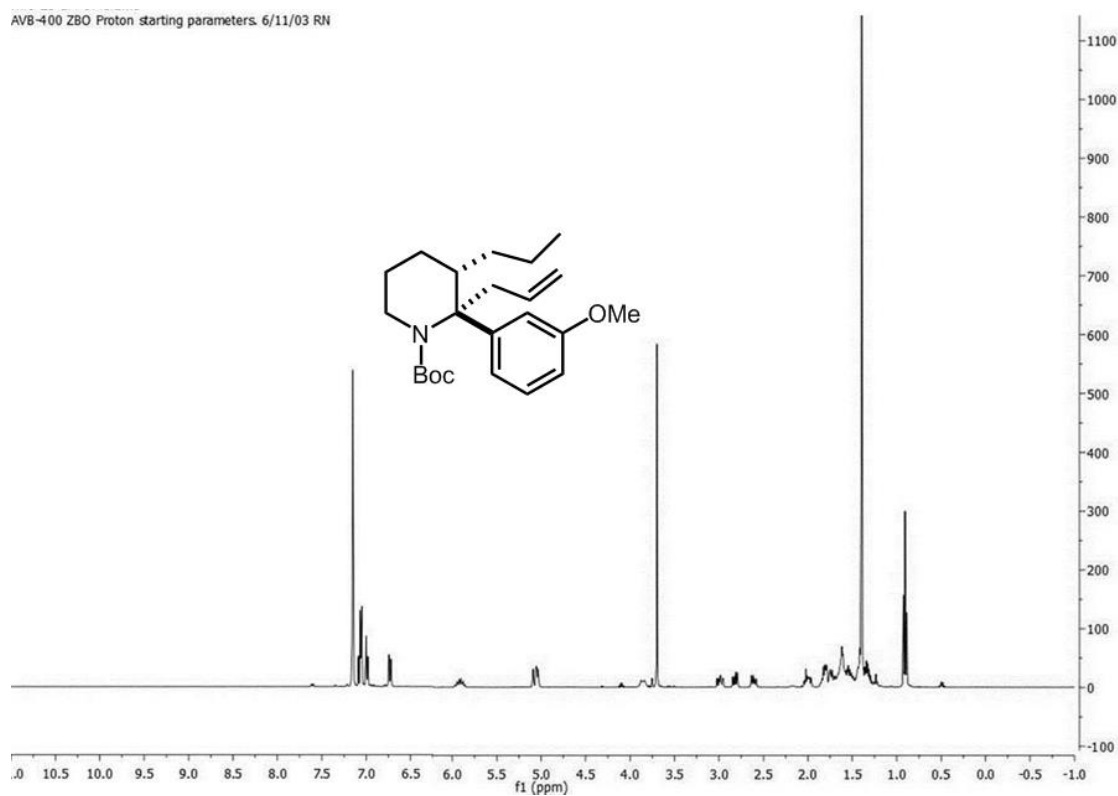

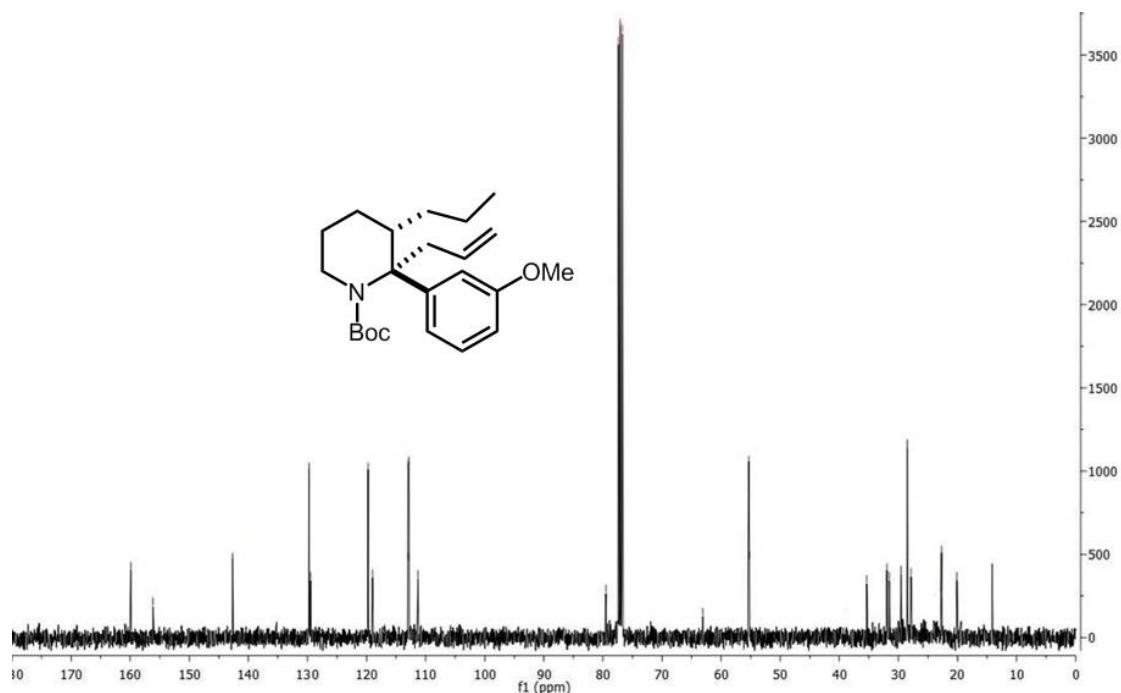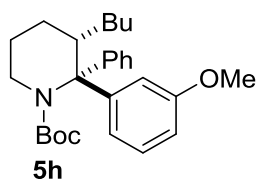

To an oven-dried, septum-capped, round-bottomed flask equipped with a stir bar was added a solution of **3c** (289 mg, 1.0 equiv) in THF (10 mL) nitrogen, in the presence of TMEDA (1.2 equiv). The mixture was cooled to  $-78\text{ }^{\circ}\text{C}$  and *n*-BuLi (2 equiv) was added slowly. After 5 min at this temperature, the solution was transferred to a bath at  $0\text{ }^{\circ}\text{C}$  and stirred for 10 min. After complete consumption of the starting material (as judged by LCMS and TLC), the solution was returned to the bath at  $-78\text{ }^{\circ}\text{C}$  and a solution of  $\text{ZnCl}_2$  (1.3 mL, 1.0 M in THF, 1.3 equiv) was added slowly. After 30 min, the mixture was warmed to room temperature slowly. After 30 min at room temperature,  $\text{Pd}_2(\text{dba})_3$  (37 mg, 0.04 mmol, 4 mol%), *t*- $\text{Bu}_3\text{P}\cdot\text{HBF}_4$  (23 mg, 0.08 mmol, 8 mol%) and bromobenzene (1.1 equiv), were added sequentially prior to warming to  $50\text{ }^{\circ}\text{C}$ . After stirring for 48 h at  $50\text{ }^{\circ}\text{C}$ , the mixture was diluted with  $\text{Et}_2\text{O}$  and *sat.*  $\text{NH}_4\text{Cl}$  was added. The phases were separated and the aqueous layer was extracted *four* times with  $\text{Et}_2\text{O}$ . The combined organic layers were washed with brine and dried over  $\text{Na}_2\text{SO}_4$  for 30 min, filtered and concentrated to obtain the crude product.

**Purification:** Flash chromatography on silica eluting with hexane-EtOAc (90:10). Yield = 93 mg, 22%.  $^1\text{H}$  NMR (400 MHz,  $\text{CDCl}_3$ )  $\delta$  7.61 to 7.12 (10H, m), 3.94 (3H, s), 3.82 to 3.62 (2H, m), 1.93 to 1.57 (2H, m), 1.49 to 0.70 (17H, m), 0.65 to 0.62 (3H, t).  $^{13}\text{C}$  NMR (101 MHz,  $\text{CDCl}_3$ )  $\delta$  161.1, 156.3, 140.8, 132.6, 128.8, 127.7, 127.1, 125.3, 115.4, 110.6, 79.2, 69.4, 57.3, 45.8, 42.1, 29.4, 28.3, 24.5, 22.1, 15.6. **HRMS- $\text{EI}^+$**  ( $m/z$ ): calc'd for  $\text{C}_{27}\text{H}_{37}\text{NO}_3$  423.2773, found 423.2776.

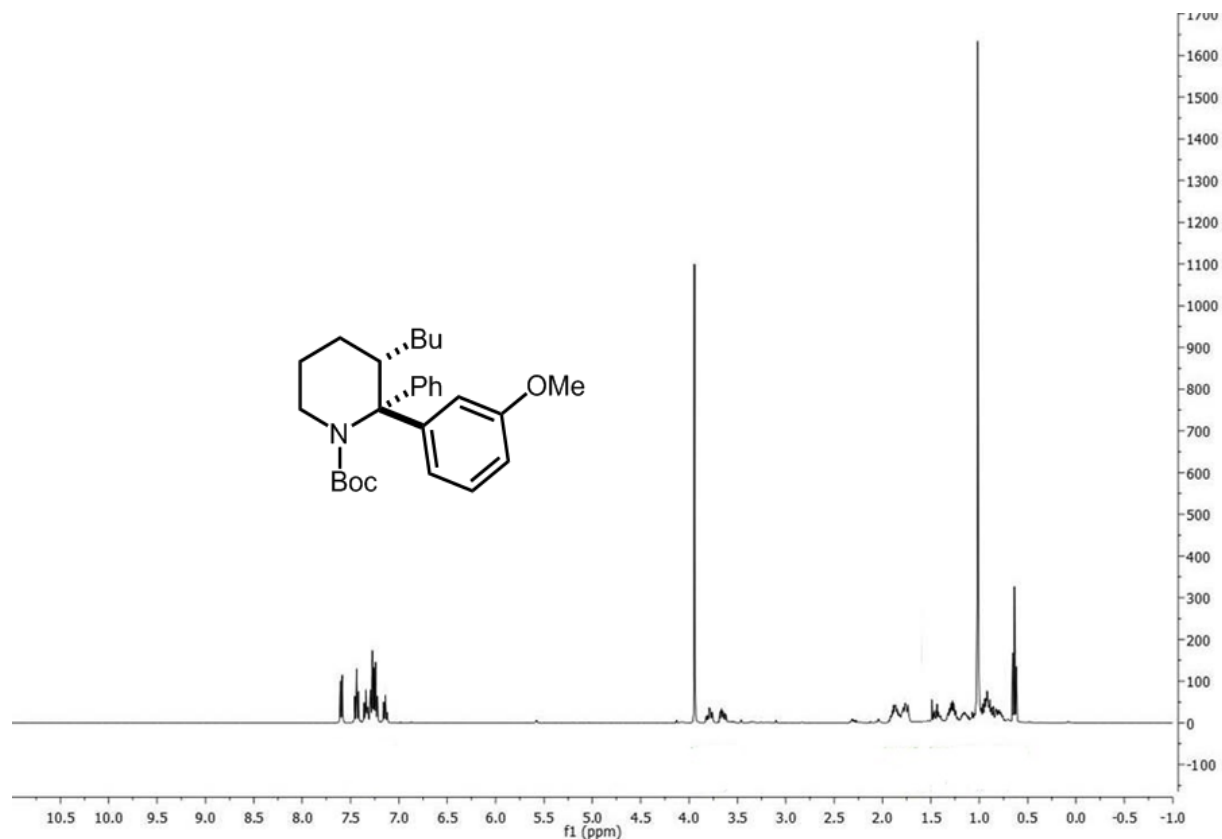

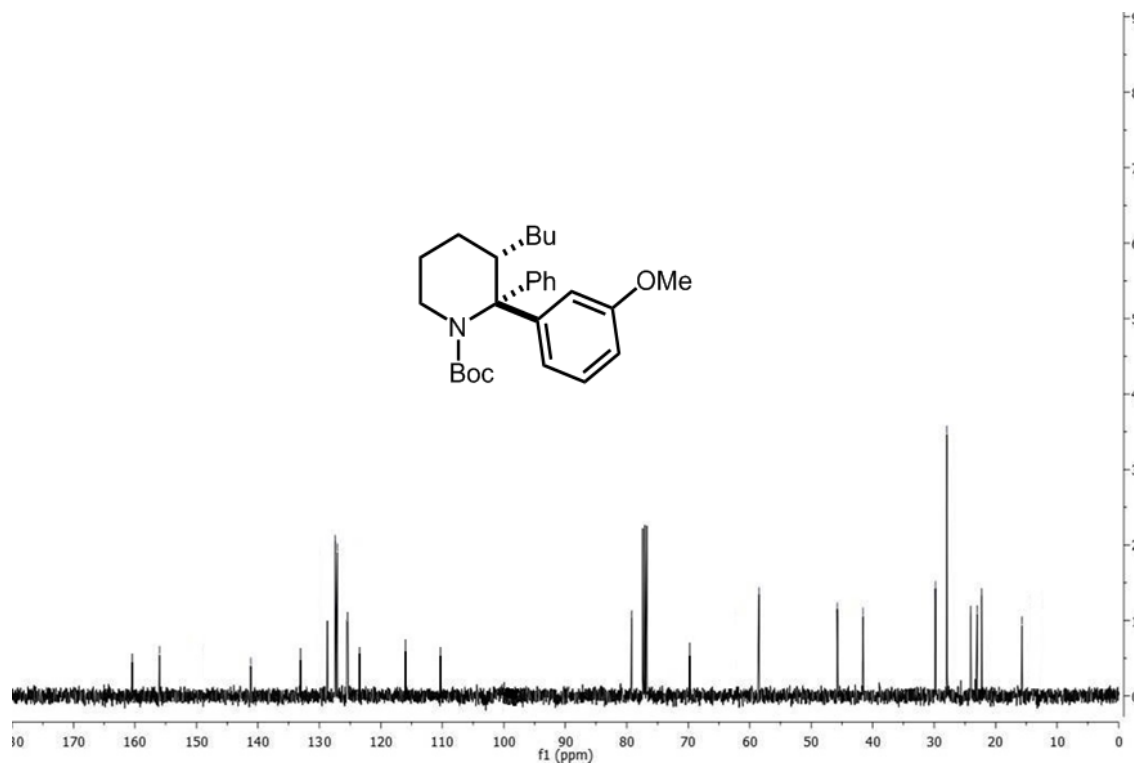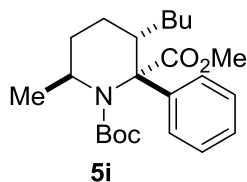

Prepared from **3i** (68.3 mg, 0.25 mmol), *n*-BuLi (2.5 equiv), and methyl chloroformate (3 equiv) using **General Procedure B**. Purification: Flash chromatography on silica eluting with hexane:EtOAc (80:20). Yield = 81 mg; 83%.  $^1\text{H NMR}$  (400 MHz,  $\text{CDCl}_3$ )  $\delta$  7.48 to 7.24 (m, 5H), 4.41 to 4.36 (m, 1H), 3.83 (s, 3H), 2.43 to 2.35 (m, 1H), 2.17 to 1.83 (m, 2H), 1.68 to 1.21 (m, 17H), 1.00 to 0.80 (m, 6H overlapping doublet and triplet).  $^{13}\text{C NMR}$  (101 MHz,  $\text{CDCl}_3$ )  $\delta$  171.4, 156.4, 139.8, 128.0, 127.0, 126.3, 79.6, 75.2, 56.4, 46.9, 38.7, 34.1, 30.8, 29.8, 28.5, 23.4, 22.3, 21.6, 21.2, 14.4. **HRMS-EI** $^+$  ( $m/z$ ): Calcd. for  $\text{C}_{23}\text{H}_{35}\text{NO}_4$   $[\text{M}]^+$  389.2566; found, 389.2561.



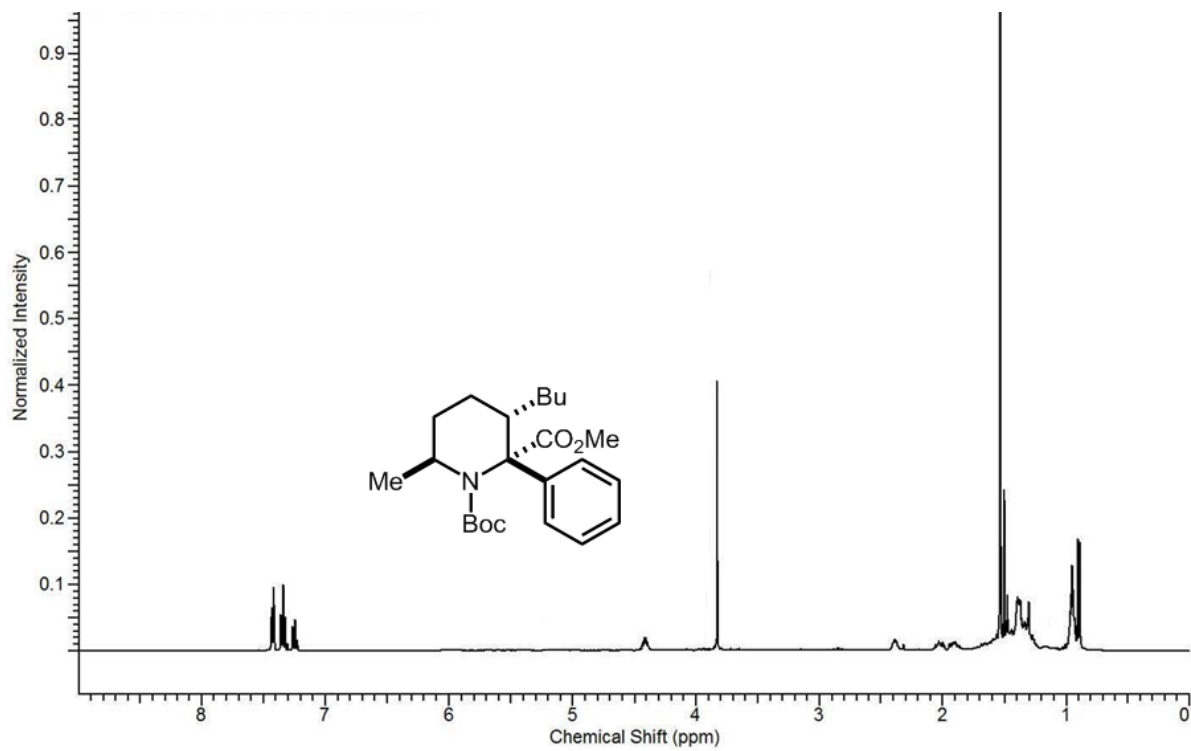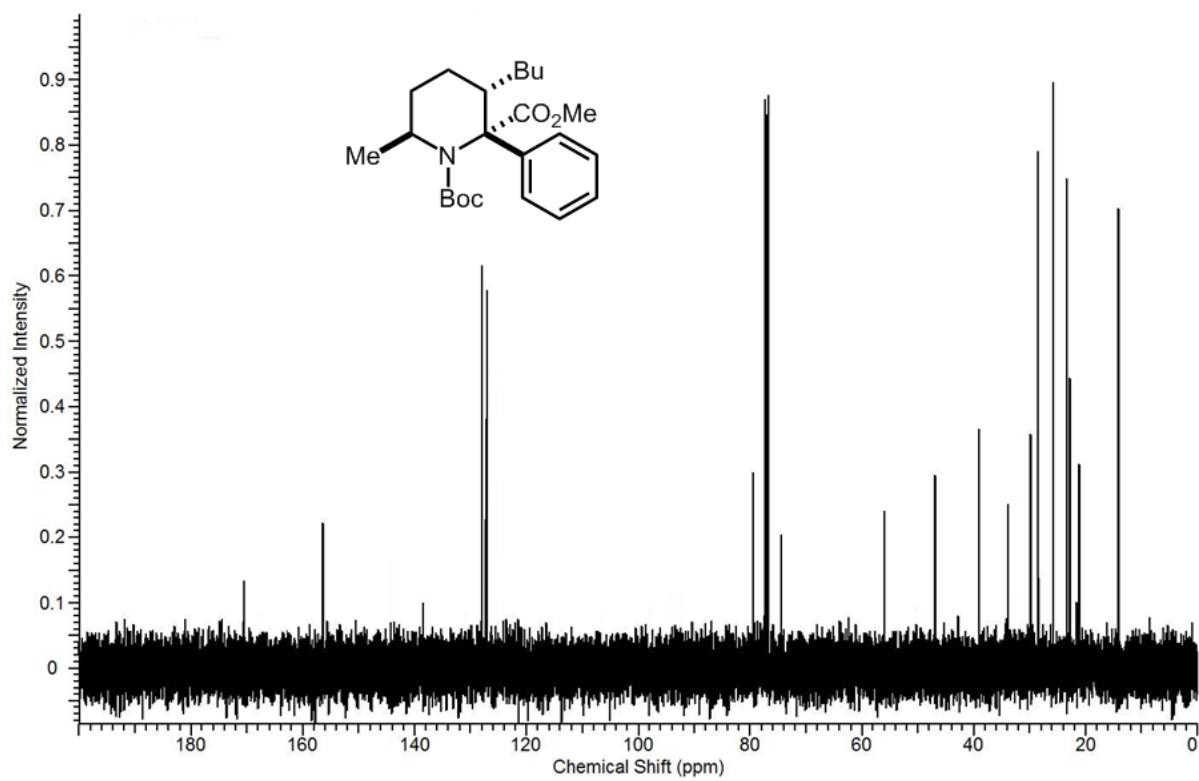

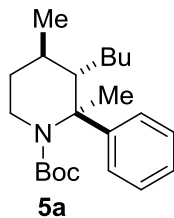

Prepared from **3a** (136.5 mg, 0.50 mmol), *n*-BuLi (2 equiv), and Me<sub>2</sub>SO<sub>4</sub> (3 equiv) using **General Procedure B**. Purification: Flash chromatography on silica eluting with hexane:EtOAc (95:5). Yield = 147 mg; 85%. Data as reported.<sup>6</sup>

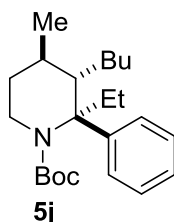

Prepared from **3a** (136.5 mg, 0.50 mmol), *n*-BuLi (2 equiv), and ethyl iodide (3 equiv) using **General Procedure B**. Purification: Flash chromatography on silica eluting with hexane:EtOAc (95:5). Yield = 119 mg; 66%. <sup>1</sup>H NMR (400 MHz, CDCl<sub>3</sub>) δ 7.40 to 7.21 (5H, m), 3.93 to 3.87 (1H, m), 3.35 to 3.28 (1H, m), 2.05 to 2.00 (1H, m), 1.88 to 1.80 (1H, m), 1.65 to 1.06 (17H, m), 1.01 to 0.80 (6H, m), 0.75 (3H, d). <sup>13</sup>C NMR (101 MHz, CDCl<sub>3</sub>) δ 156.2, 143.2, 141.2, 128.7, 128.2, 127.2, 127.1, 126.1, 125.8, 79.4, 65.3, 44.4, 41.6, 33.5, 31.5, 29.5, 28.4, 26.1, 23.3, 23.0, 22.5, 20.8, 14.2. **HRMS-EI**<sup>+</sup> (*m/z*): Calcd. for C<sub>23</sub>H<sub>37</sub>NO<sub>2</sub> [M]<sup>+</sup> 359.2824; found, 359.2819.

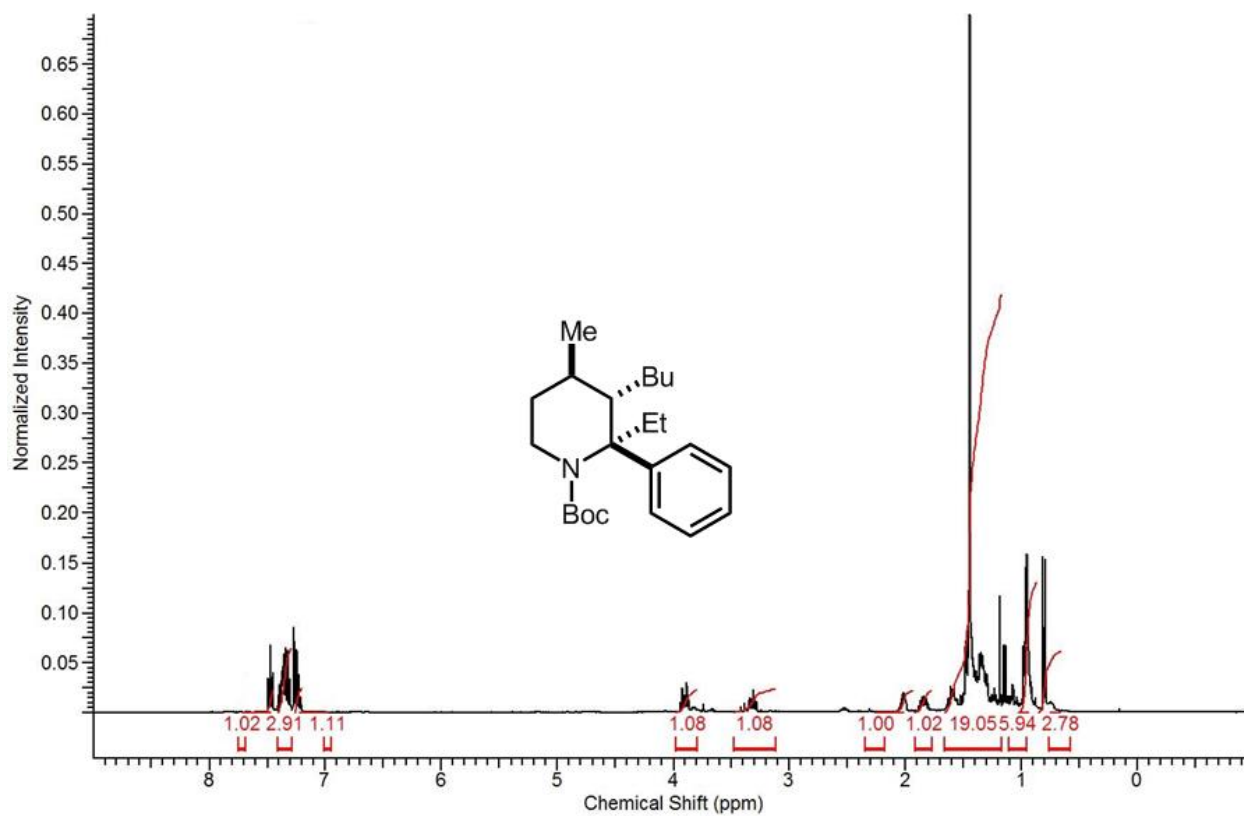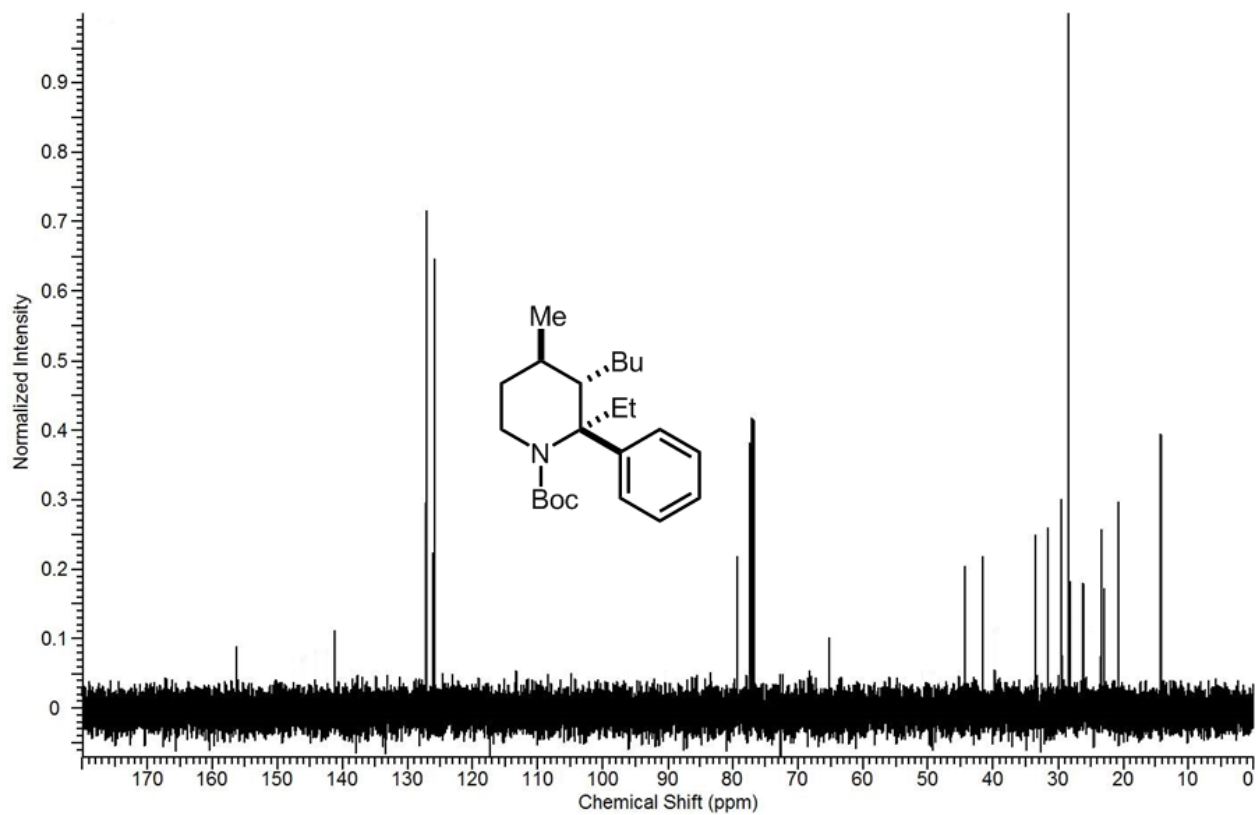

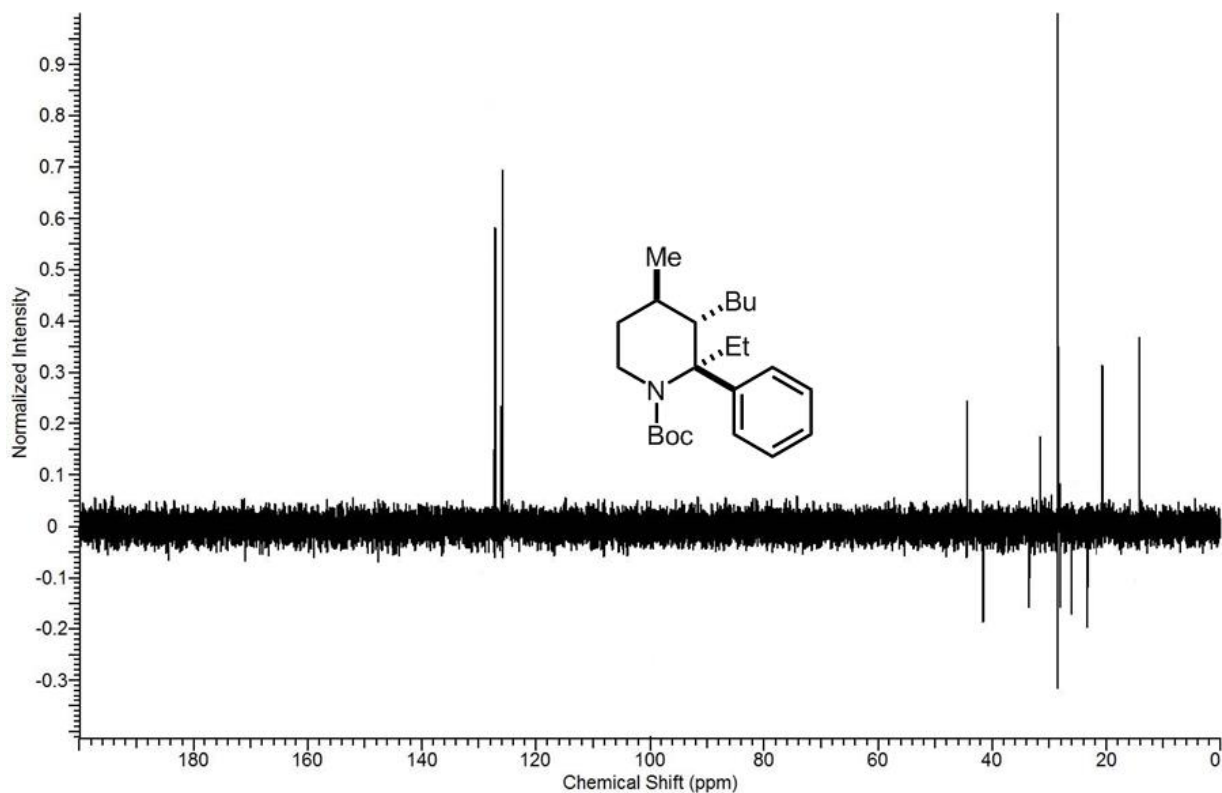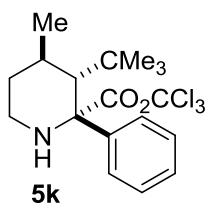

Prepared from **3a** (138 mg, 0.505 mmol), 1.7 M *t*-BuLi in pentane (2.5 equiv), and trichloromethyl chloroformate (3 equiv) using **General Procedures B & C**. Yield = 68 mg, 35% yield (over 2 steps).  $^1\text{H NMR}$  (400 MHz,  $\text{CDCl}_3$ )  $\delta$  7.43 to 7.21 (m, 5H), 3.17 to 3.00 (m, 2H), 2.10 to 2.02 (m, 1H), 1.95 to 1.86 (m, 1H), 1.72 to 1.71 (m, 1H), 1.48 to 1.41 (m, 1H), 1.32 (d, 3H), 0.89 (s, 9H).  $^{13}\text{C NMR}$  (101 MHz,  $\text{CDCl}_3$ )  $\delta$  171.6, 147.7, 134.0, 128.2, 127.5, 126.3, 72.1, 54.6, 39.7, 34.8, 29.2, 27.9, 27.6, 24.7. **HRMS- $\text{EI}^+$**  ( $m/z$ ): Calcd. for  $\text{C}_{18}\text{H}_{24}\text{Cl}_3\text{NO}_2$   $[\text{M}]^+$  391.0873; found, 391.0870.

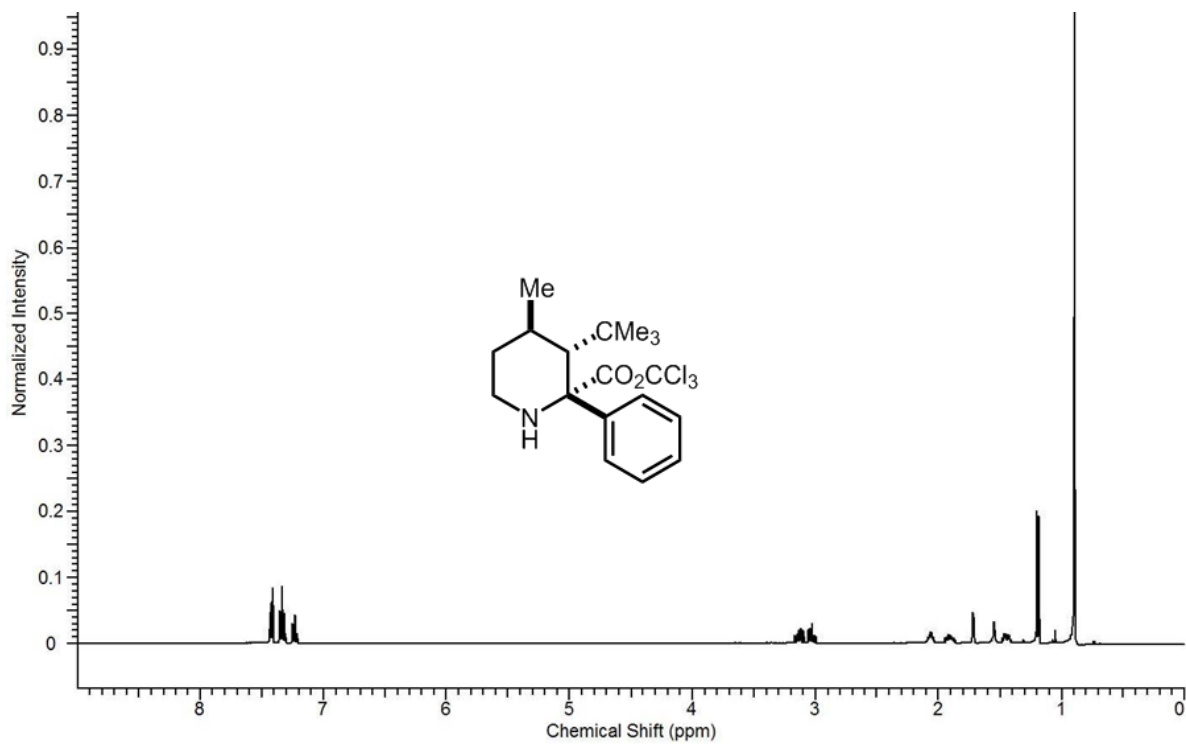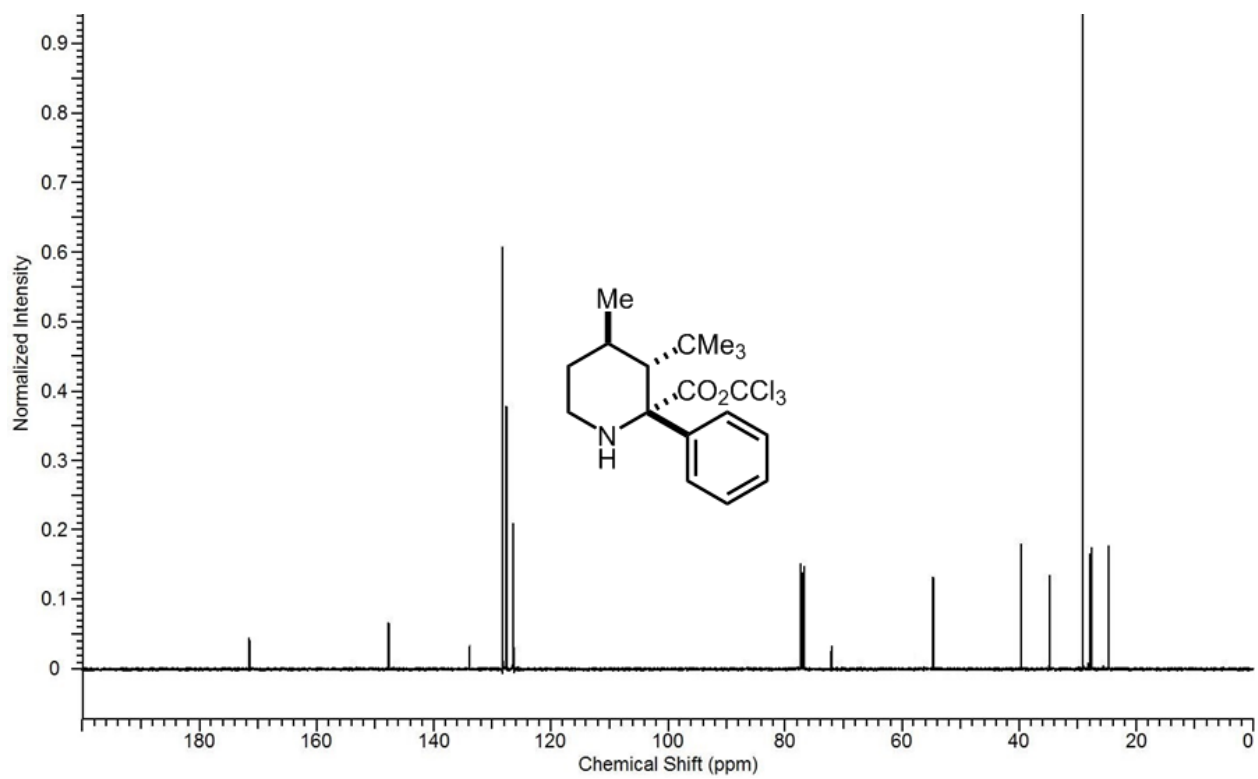

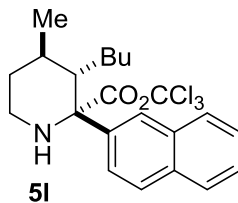

Prepared from **3j** (81 mg, 0.25 mmol) and *n*-BuLi (2 equiv), and trichloromethyl chloroformate (3 equiv) using **General Procedures B** and **C**. Purification: Flash chromatography on silica eluting with hexane:EtOAc (80:20). Yield = 94 mg; 85%.  $^1\text{H}$  NMR (400 MHz,  $\text{CDCl}_3$ )  $\delta$  7.88 to 7.79 (4H, m), 7.57 to 7.30 (3H, m), 3.18 to 3.13 (1H, dd), 2.90 to 2.83 (1H, t), 1.76 to 0.62 (17H, m).  $^{13}\text{C}$  NMR (101 MHz,  $\text{CDCl}_3$ )  $\delta$  170.3, 138.4, 133.7, 132.6, 132.4, 128.9, 128.3, 127.7, 127.6, 126.8, 126.3, 125.7, 64.1, 44.6, 44.1, 32.5, 30.4, 29.7, 27.0, 22.9, 19.0, 13.7. **HRMS-EI<sup>+</sup>** (*m/z*): Calcd. for  $\text{C}_{22}\text{H}_{26}\text{Cl}_3\text{NO}_2$  [ $\text{M}$ ]<sup>+</sup> 441.1029; found, 441.1032.

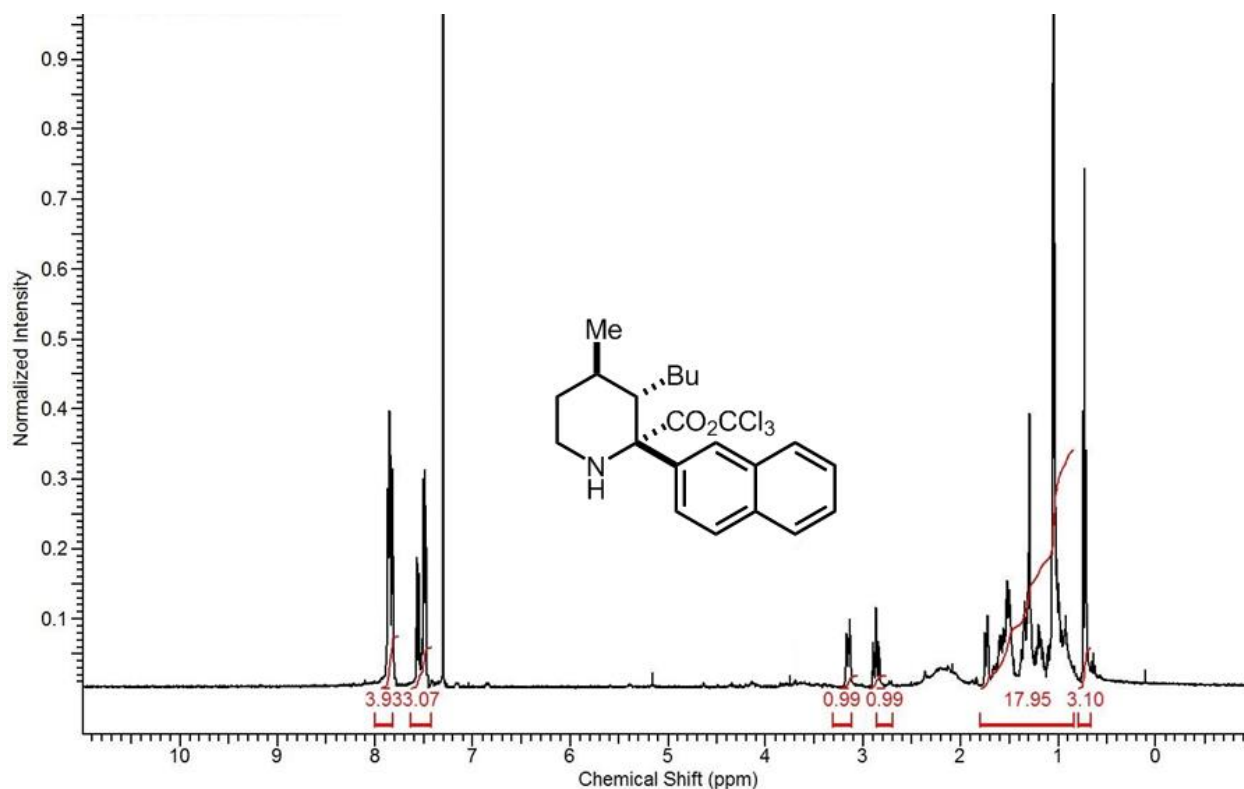

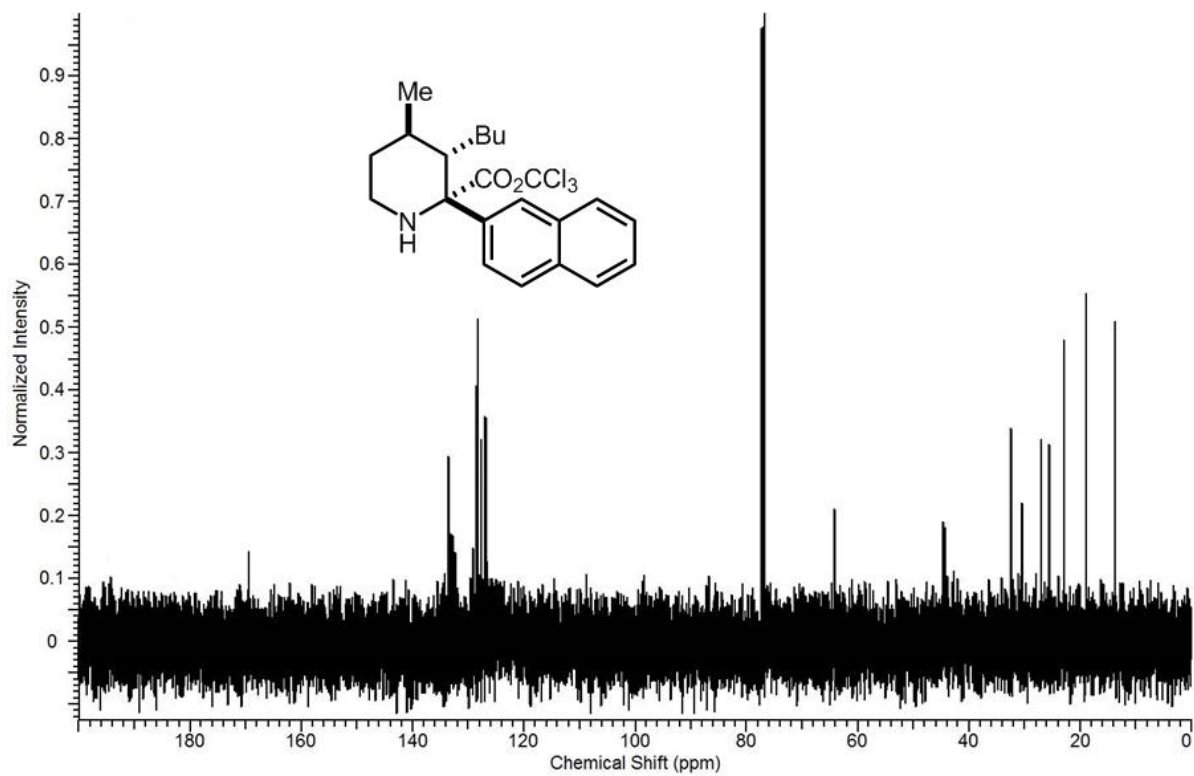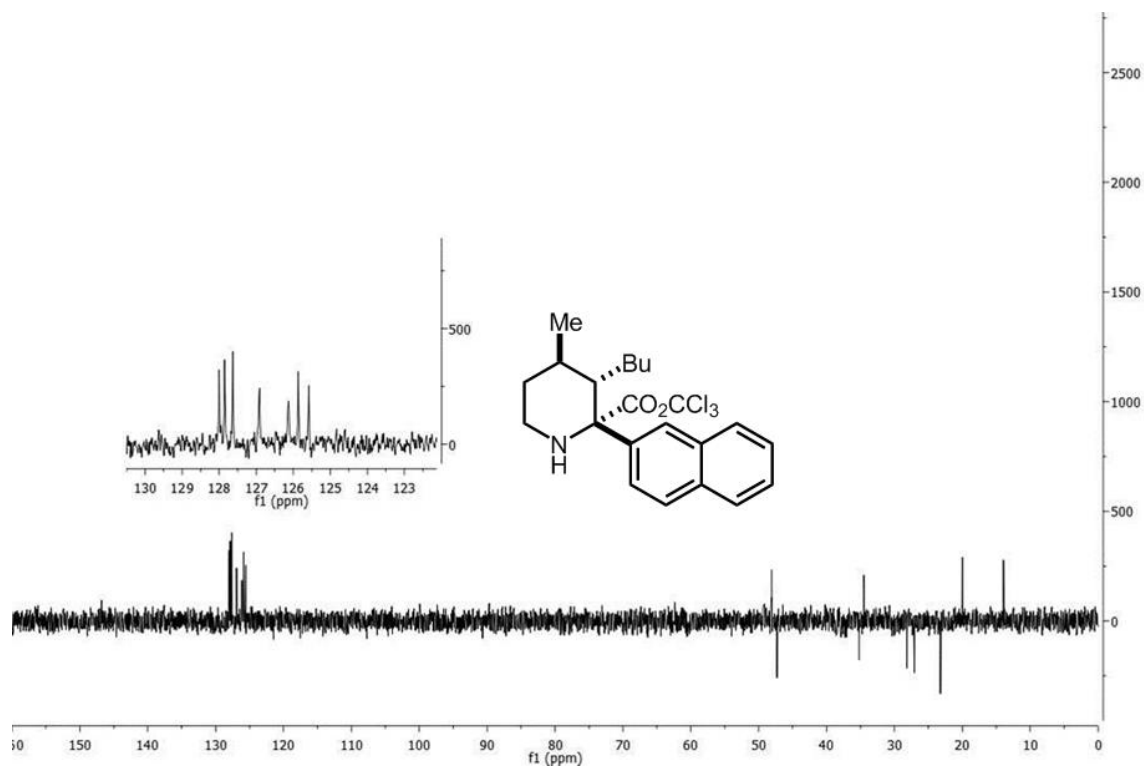

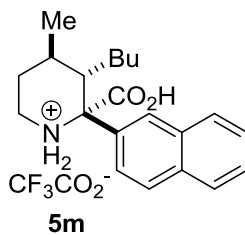

Prepared from **3j** (81 mg, 0.25 mmol) and *n*-BuLi (2 equiv), and dry ice (~5 equiv) using **General Procedures B** and **C**. Yield = 83 mg, 75% yield (over 2 steps).  $^1\text{H}$  NMR (400 MHz,  $\text{CDCl}_3$ )  $\delta$  11.74, (1H), 8.91 (1H), 8.63 (1H), 8.05 to 7.40 (7H), 3.97 (1H), 2.67 (1H), 2.02 (1H), 1.68 to 0.69 (16H).  $^{13}\text{C}$  NMR (101 MHz,  $\text{CDCl}_3$ )  $\delta$  169.1, 138.4, 133.5, 133.2, 128.6, 128.3, 127.7, 127.0, 126.7, 126.4, 125.7, 64.2, 44.6, 44.2, 32.4, 30.5, 27.1, 25.6, 22.9, 19.0, 13.6.

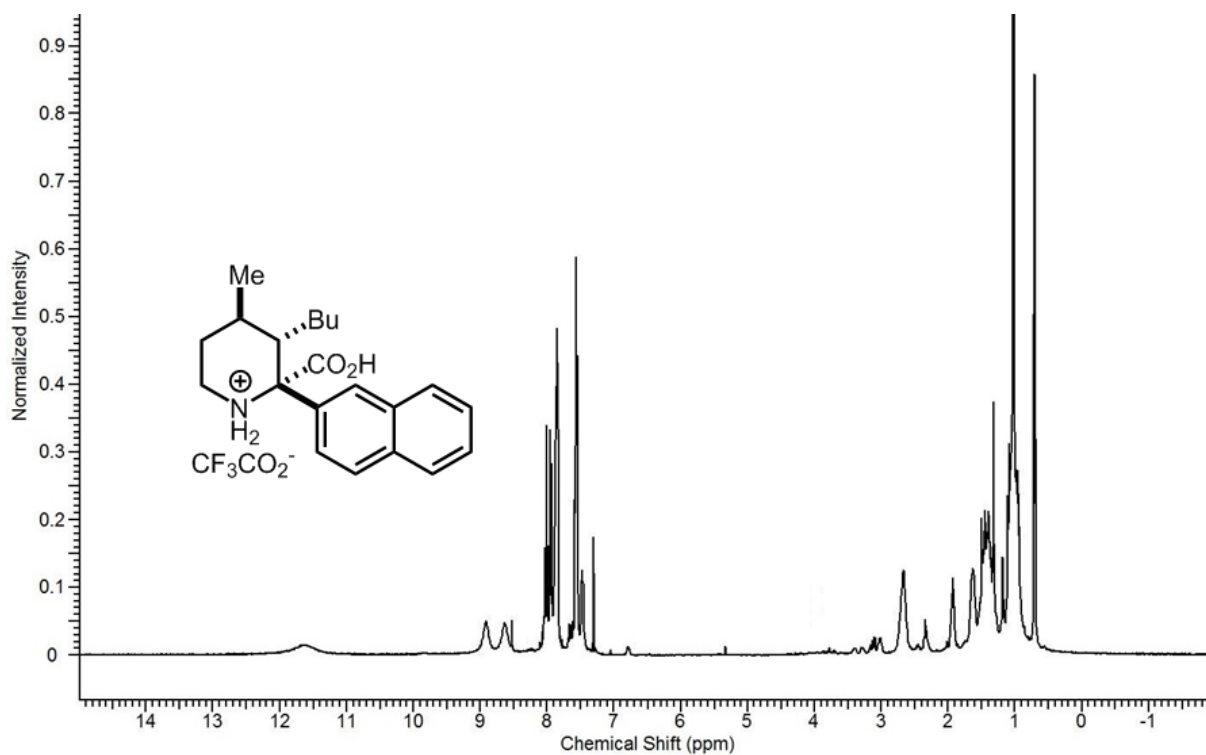



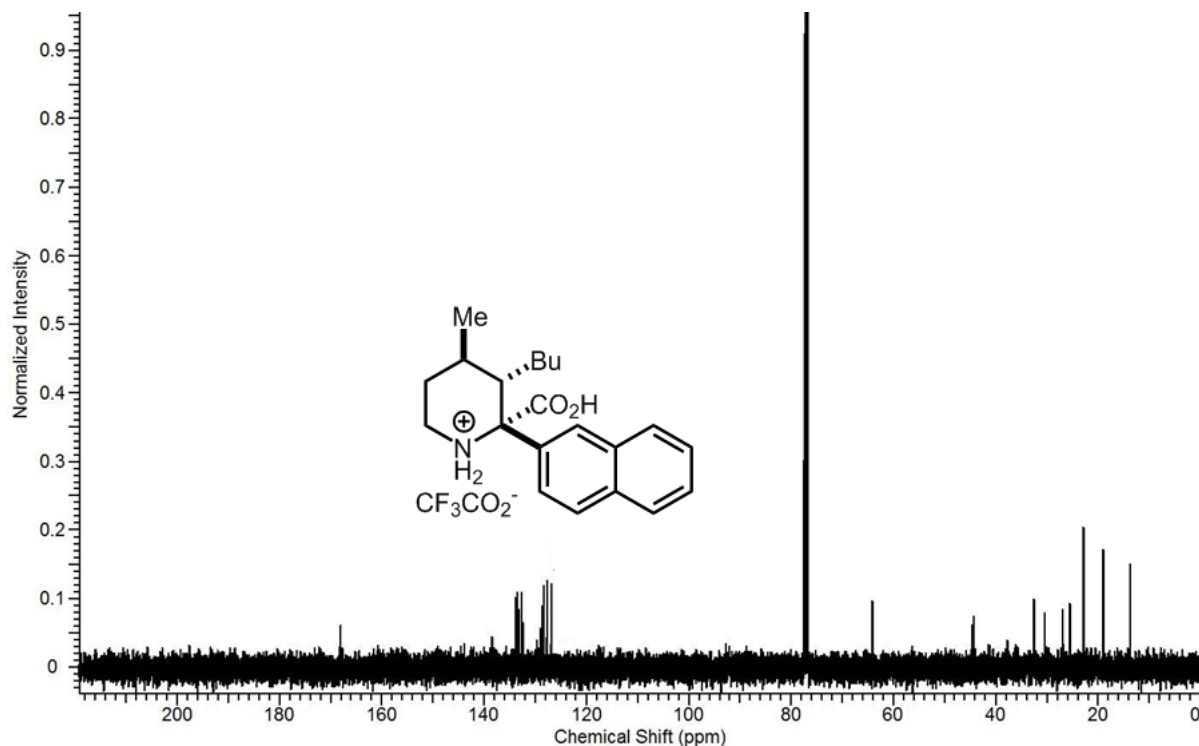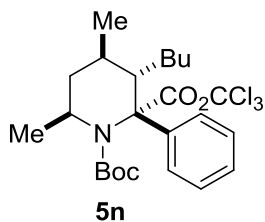

Prepared from **3l** (68.3 mg, 0.25 mmol), *n*-BuLi (2.5 equiv), and methyl chloroformate (3 equiv) using **General Procedure B**. Yield = 100 mg, 79%.  $^1\text{H}$  NMR (400 MHz, CDCl<sub>3</sub>)  $\delta$  7.44 to 7.22 (5H, m), 3.90 to 3.84 (1H, m), 2.19 to 2.11 (1H, m), 1.89 to 0.89 (27H, m).  $^{13}\text{C}$  NMR (101 MHz, CDCl<sub>3</sub>)  $\delta$  167.3, 156.3, 144.6, 127.9, 127.3, 126.2, 79.3, 56.0, 50.5, 42.8, 37.0, 35.0, 33.4, 29.5, 28.5, 23.0, 21.6, 20.3, 14.1.

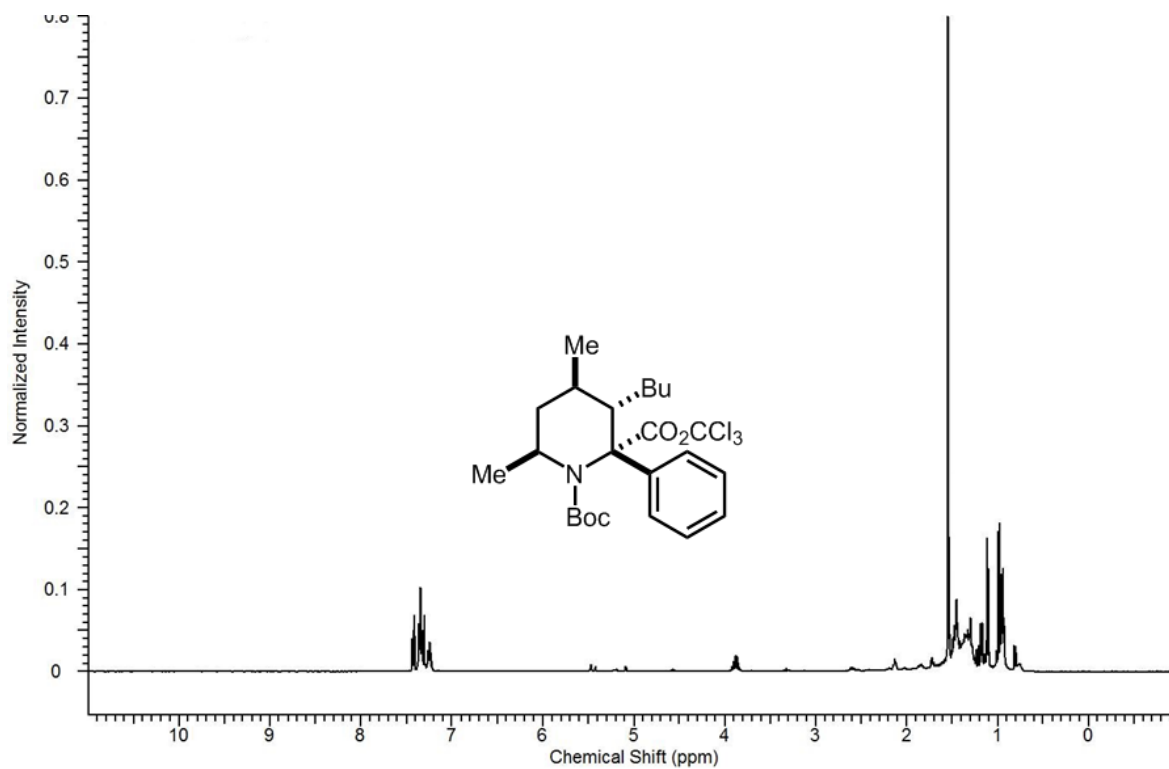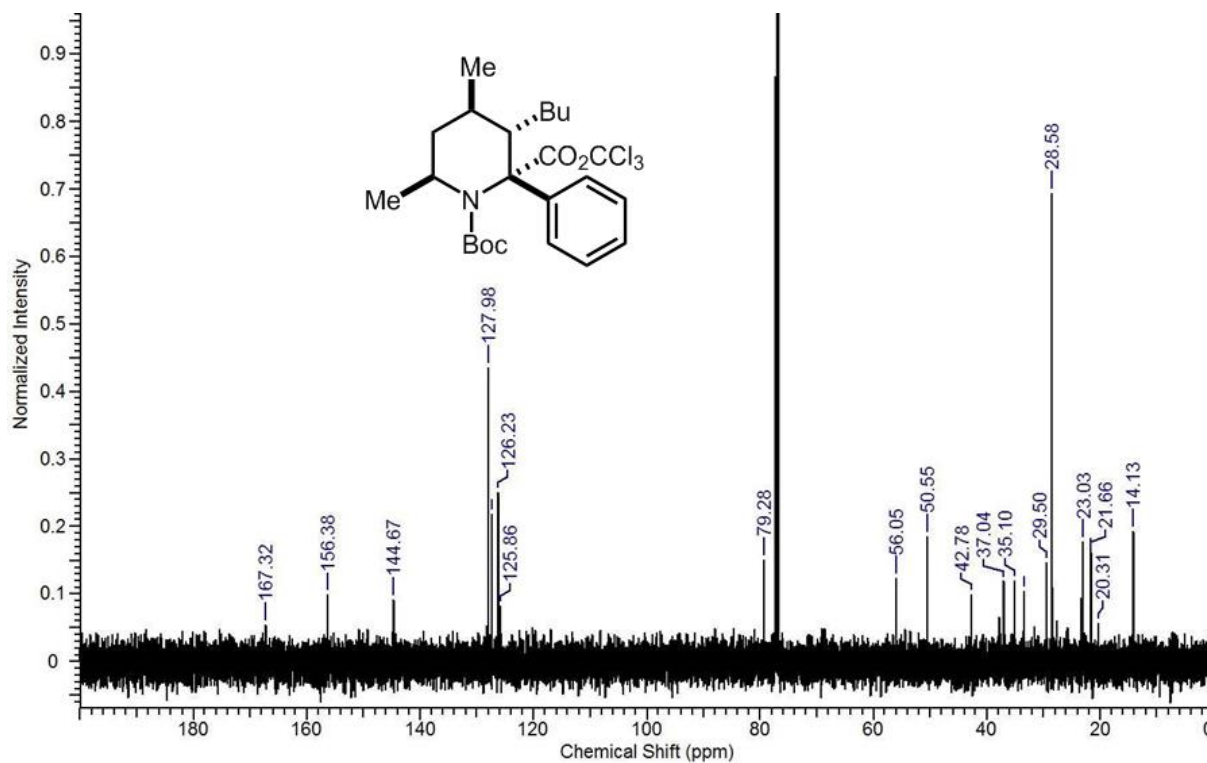

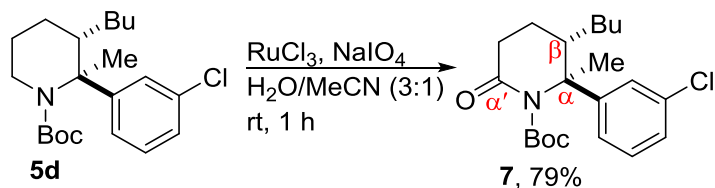

To a solution of  $\text{NaIO}_4$  (638 mg, 3 mmol) in  $\text{H}_2\text{O}$  (15 mL) was added  $\text{RuCl}_3 \cdot \text{H}_2\text{O}$  (2 mol%) and a yellow solution was formed. The mixture was added to a solution of **5d** (365 mg, 1 mmol, 1 equiv) in acetonitrile (5 mL) and then vigorously stirred at room temperature for 1 h. The mixture was diluted with EtOAc and the organic layer was separated. The aqueous layer was extracted twice with EtOAc. The combined organic layers were dried over  $\text{Na}_2\text{SO}_4$ , filtered through silica gel to remove a black precipitate and then concentrated under reduced pressure to obtain the desired lactam as an oil.  $^1\text{H NMR}$  (400 MHz,  $\text{CDCl}_3$ )  $\delta$  7.39 (1H, s) 7.20 to 7.16 (2H, m), 6.87 (1H, d), 2.66 to 2.63 (1H, t), 1.93 to 0.73 (24H, m).  $^{13}\text{C NMR}$  (101 MHz,  $\text{CDCl}_3$ )  $\delta$  171.5, 153.0, 146.3, 134.1, 129.3, 127.5, 127.1, 124.9, 83.2, 67.3, 45.7, 32.0, 29.6, 28.8, 27.2, 22.5, 22.3, 20.0, 13.7. HRMS calc for  $\text{C}_{21}\text{H}_{30}\text{ClNO}_3$  379.1914, found 379.1917.

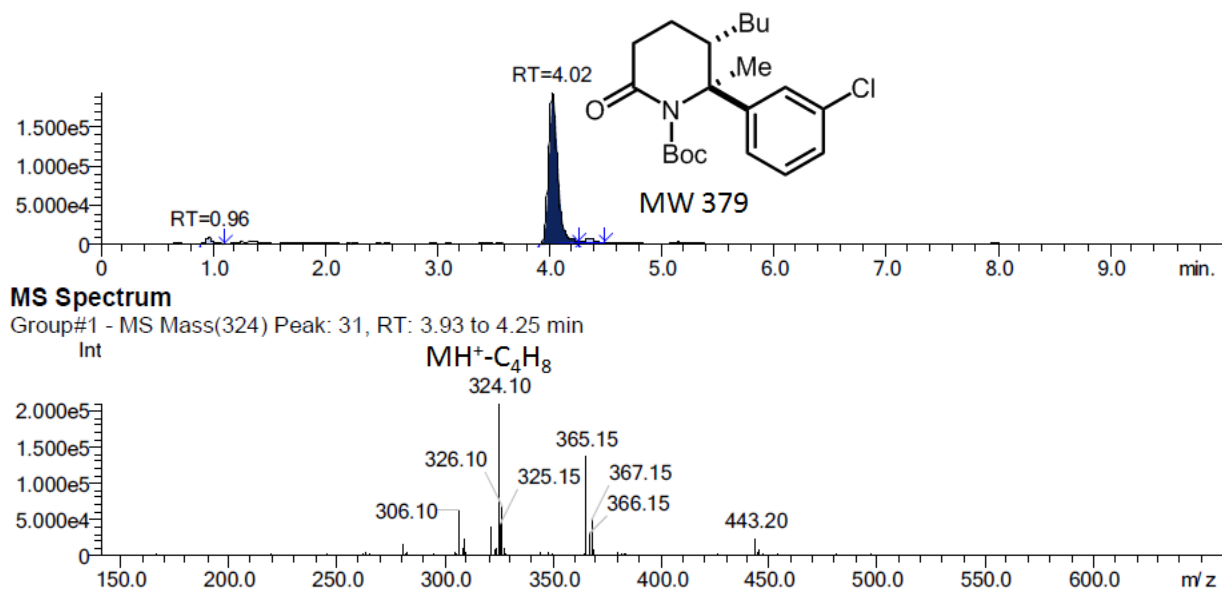

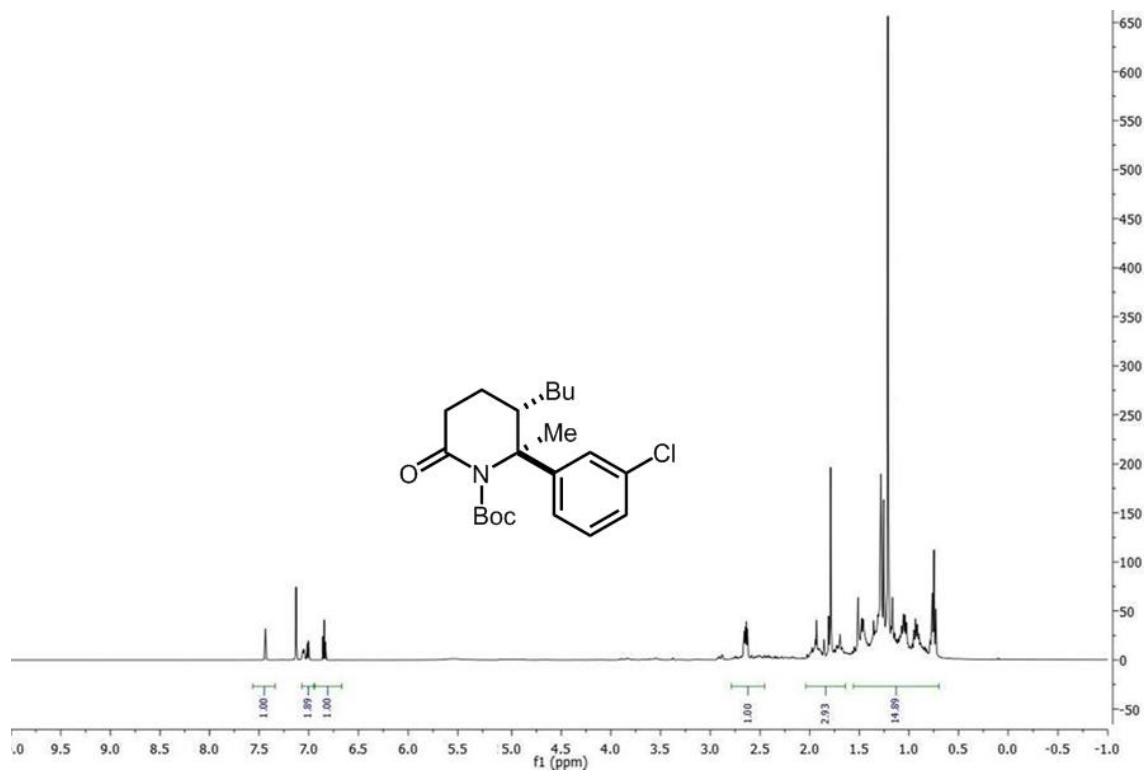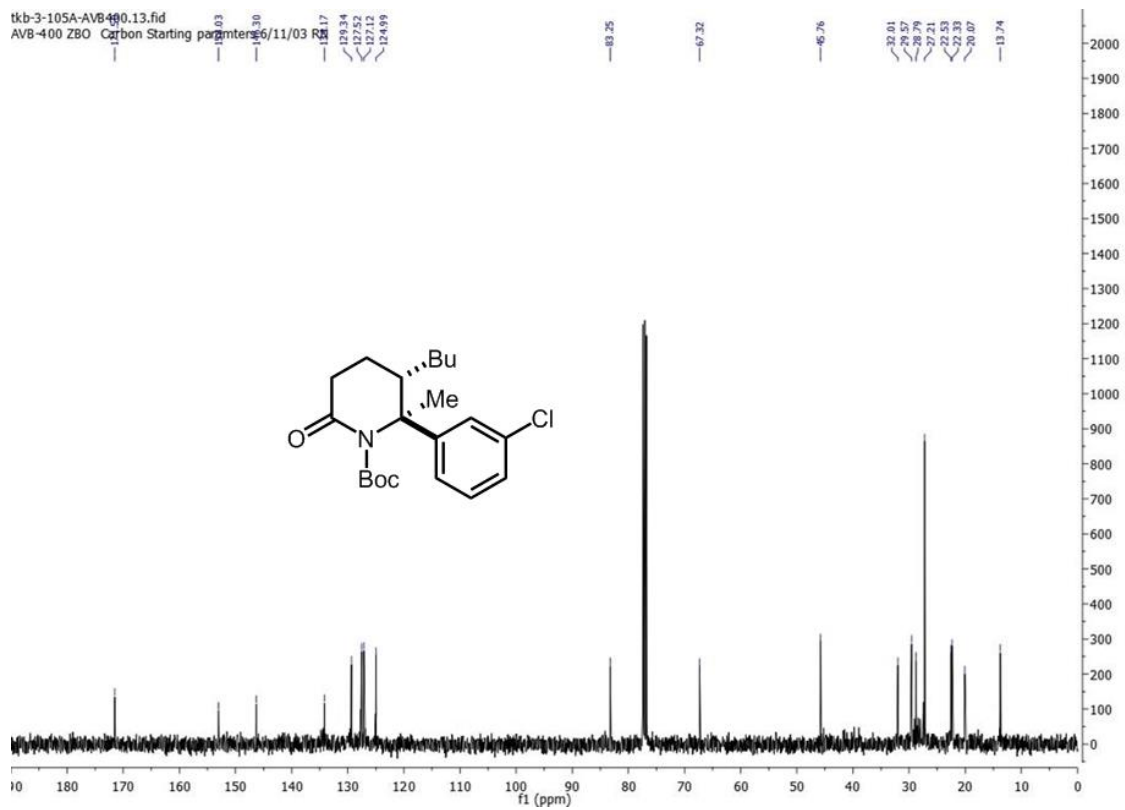

tcb-3-105A-AVB400.3.fid  
AVB-400 ZBO Carbon Starting paramters 6/11/03 RN

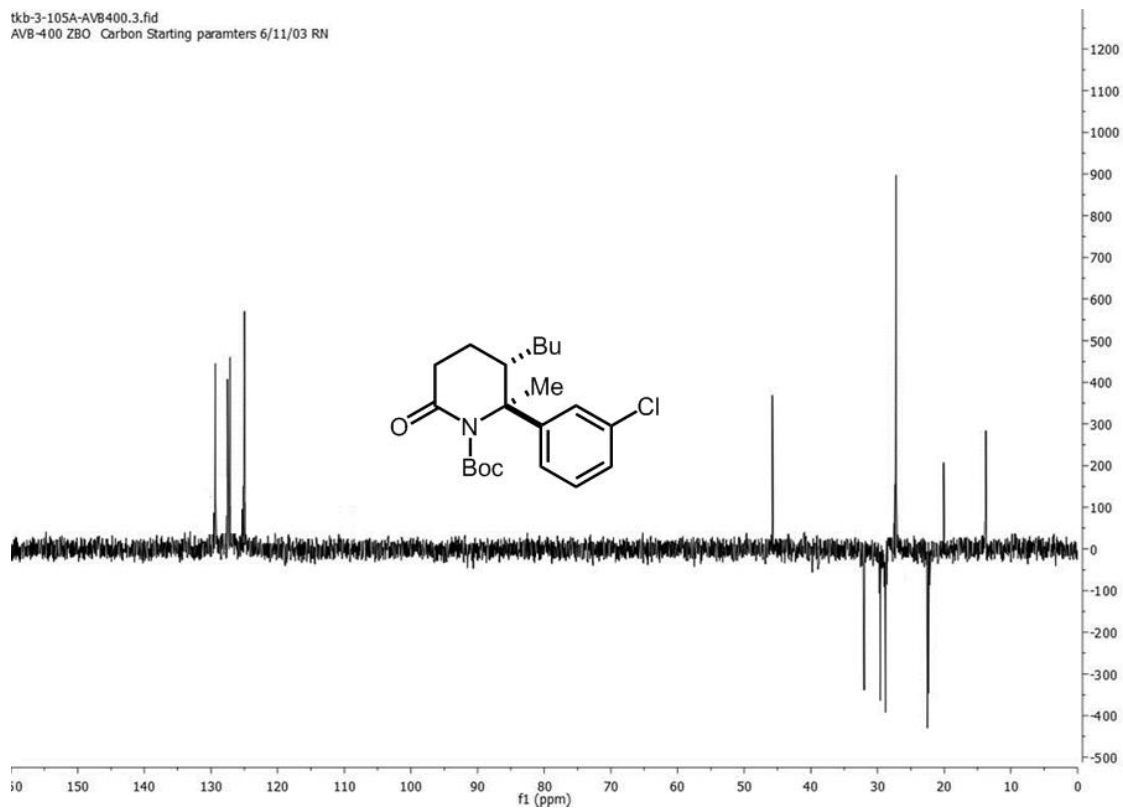

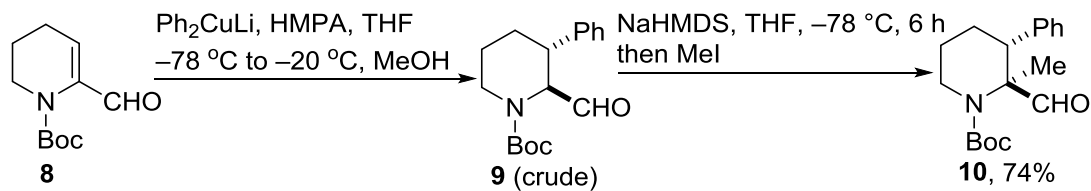

Crude pipercolinal **9** was prepared from enal **8** (211 mg, 1 mmol, 1 equiv), lithium diphenyl cuprate (2 equiv), and HMPA (1.2 equiv), using **General Procedure A**.

**Methylation:** A solution of NaHMDS (1.5 mL, 1.5 mmol, 1.0 M in THF, 1.5 equiv) was added dropwise to a solution of **9** in THF (5 mL) and the mixture was stirred for 10 min at  $-78$  °C then for 1 h at  $-40$  °C (LCMS-monitoring). After cooling to  $-78$  °C, methyl iodide (3 equiv) was added slowly. The mixture was allowed to warm slowly to room temperature overnight. After quenching with saturated  $\text{NH}_4\text{Cl}$  (aq), extractive workup with EtOAc followed by brine washes afforded the desired quaternary pipercolinal. Purification by flash chromatography on silica eluting with Hexane/EtOAc (50:50) afforded the pure product in 74% yield from **8**.  $^1\text{H}$  NMR (400 MHz,  $\text{CDCl}_3$ ),  $\delta$  9.72 (1H, s), 7.55–7.10 (5H, m), 3.72 (2H, m), 2.44 (1H, m), 2.02–1.15 (19H, m).  $^{13}\text{C}$  NMR (101 MHz,  $\text{CDCl}_3$ )  $\delta$  = 198.2, 153.7, 138.8, 128.3, 128.0, 127.3, 126.3, 81.2, 80.6, 74.3, 47.9, 39.3, 38.3, 28.4, 28.0, 23.4, 22.4. **HRMS-EI<sup>+</sup>** ( $m/z$ ): calc for  $\text{C}_{18}\text{H}_{25}\text{NO}_3$  303.1834, found 303.1830.

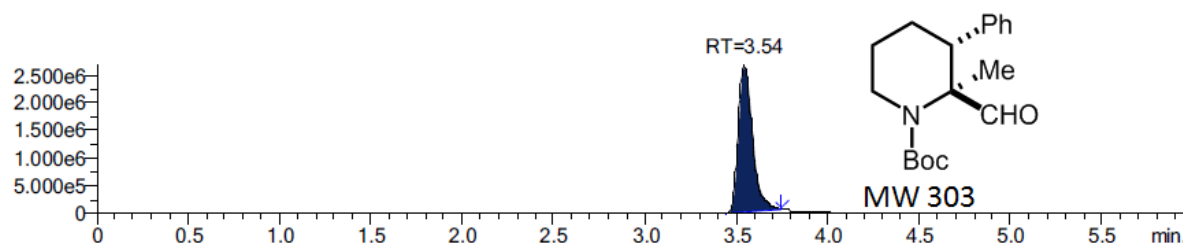

#### MS Spectrum

Group#1 - MS Mass(304) Peak: 35, RT: 3.44 to 3.70 min

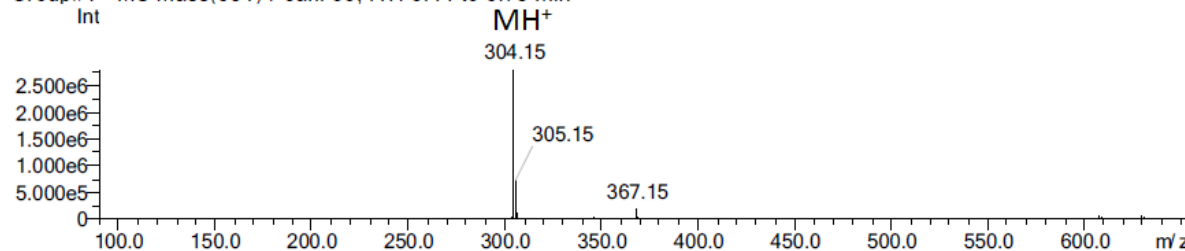

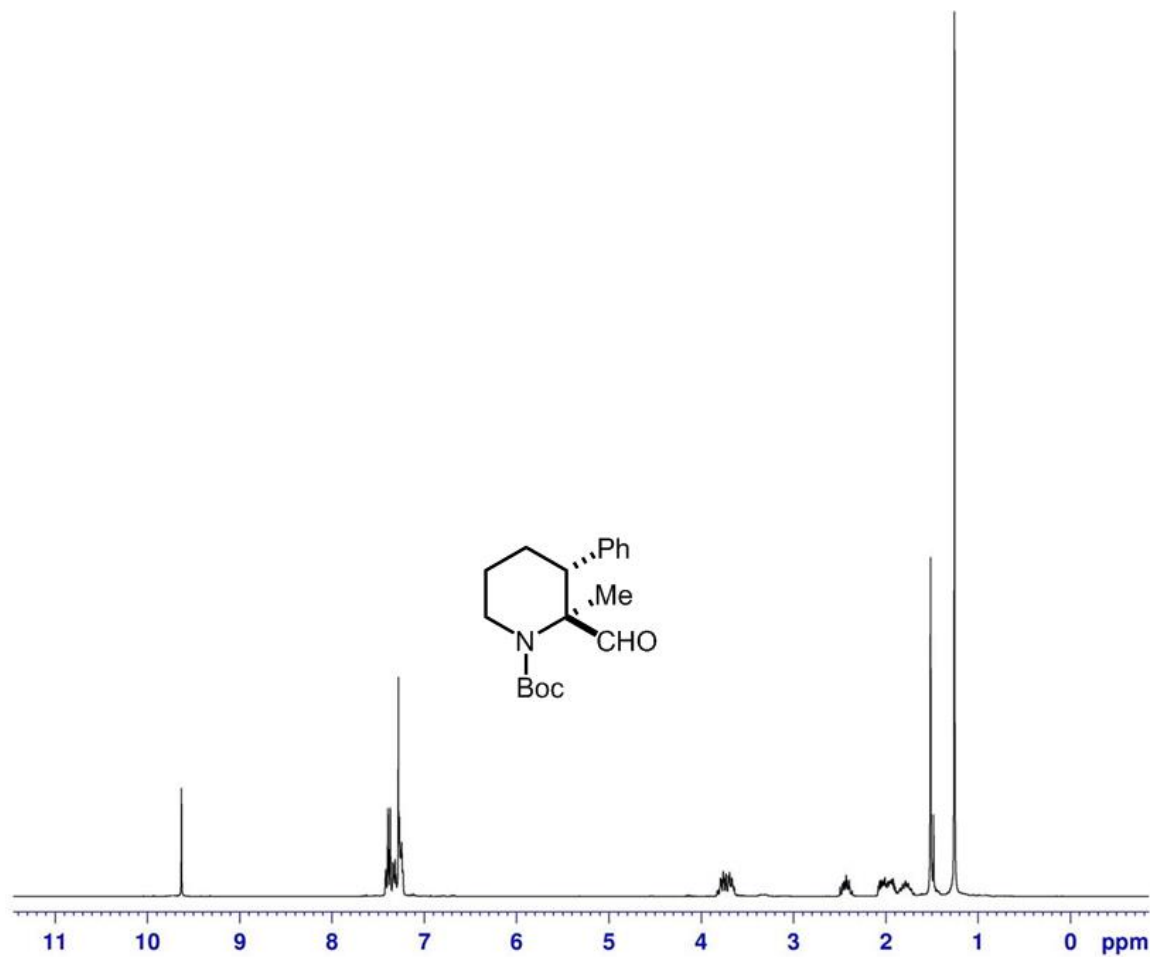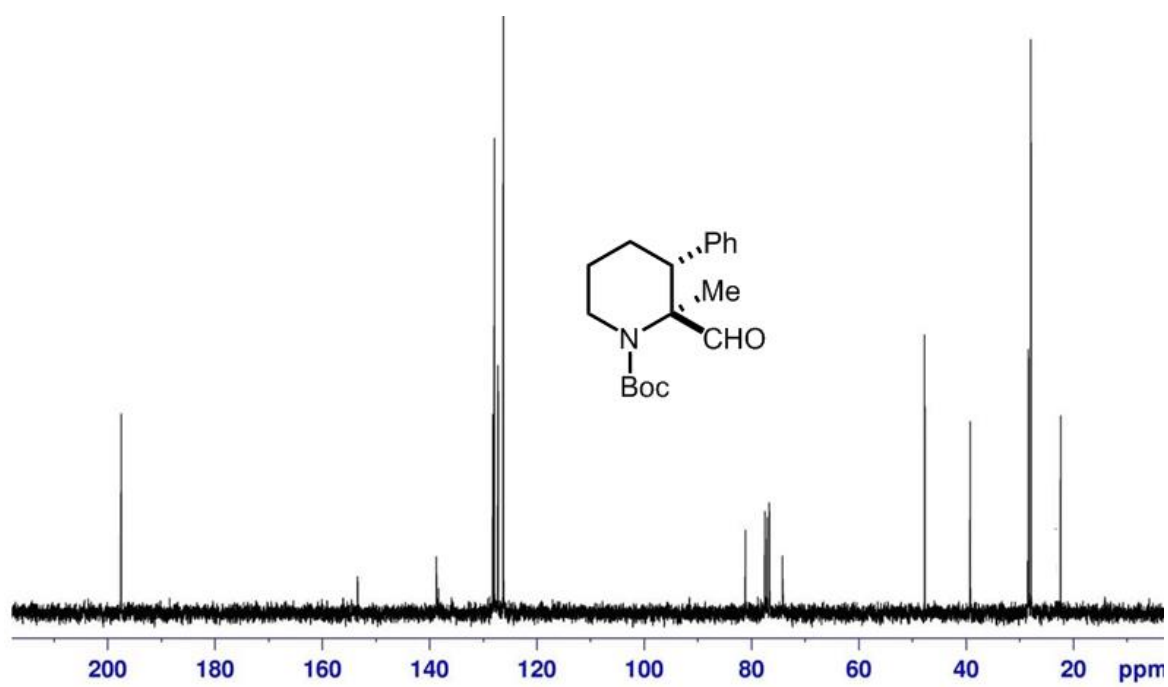

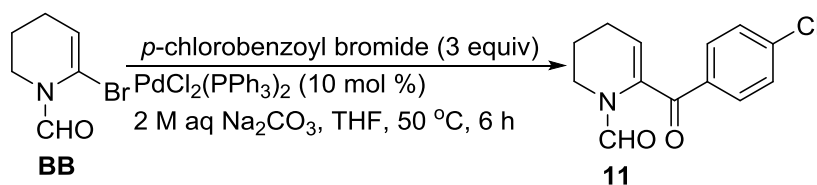

To a stirred solution of **BB** (230 mg, 1.0 mmol) in THF (10 mL) were added, under a nitrogen atmosphere, 2 M  $\text{Na}_2\text{CO}_3$  (aq) (5 mL),  $(\text{Ph}_3\text{P})_2\text{PdCl}_2$  (70 mg, 10 mol%), and 4-chloro-benzoyl chloride (0.4 mL, 3 equiv). The mixture was heated to 50 °C, and allowed to stir for 6 h. After cooling to room temperature, it was diluted with water (10 mL) and extracted with  $\text{Et}_2\text{O}$ . The organic phase was dried for 30 min over  $\text{K}_2\text{CO}_3$  and concentrated in vacuo to afford the crude product as an oil.  $^1\text{H NMR}$  (400 MHz,  $\text{CDCl}_3$ )  $\delta$  8.91 (1H, d), 7.93 (2H, d), 7.82 (2H, d), 5.23 (1H, t), 3.80 to 3.77 (2H, dd), 2.26 to 2.21 (2H, m), 1.84 to 1.81 (2H, m).  $^{13}\text{C NMR}$  (101 MHz,  $\text{CDCl}_3$ )  $\delta$  168.0, 162.7, 138.4, 132.7, 132.4, 125.1, 109.5, 104.3, 41.3, 23.8, 21.1. **HRMS- $\text{EI}^+$**  ( $m/z$ ): calc'd for  $\text{C}_{13}\text{H}_{12}\text{ClNO}_2$  249.0557, found 249.0560.

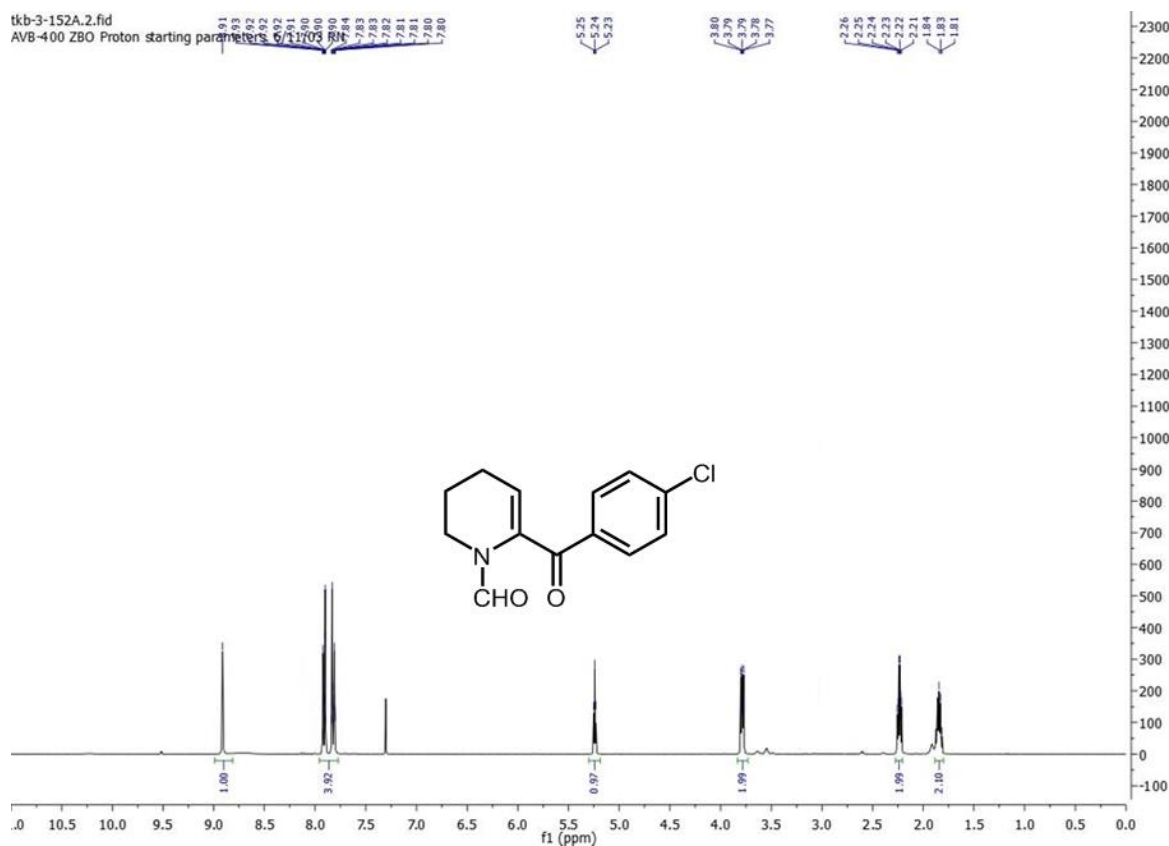



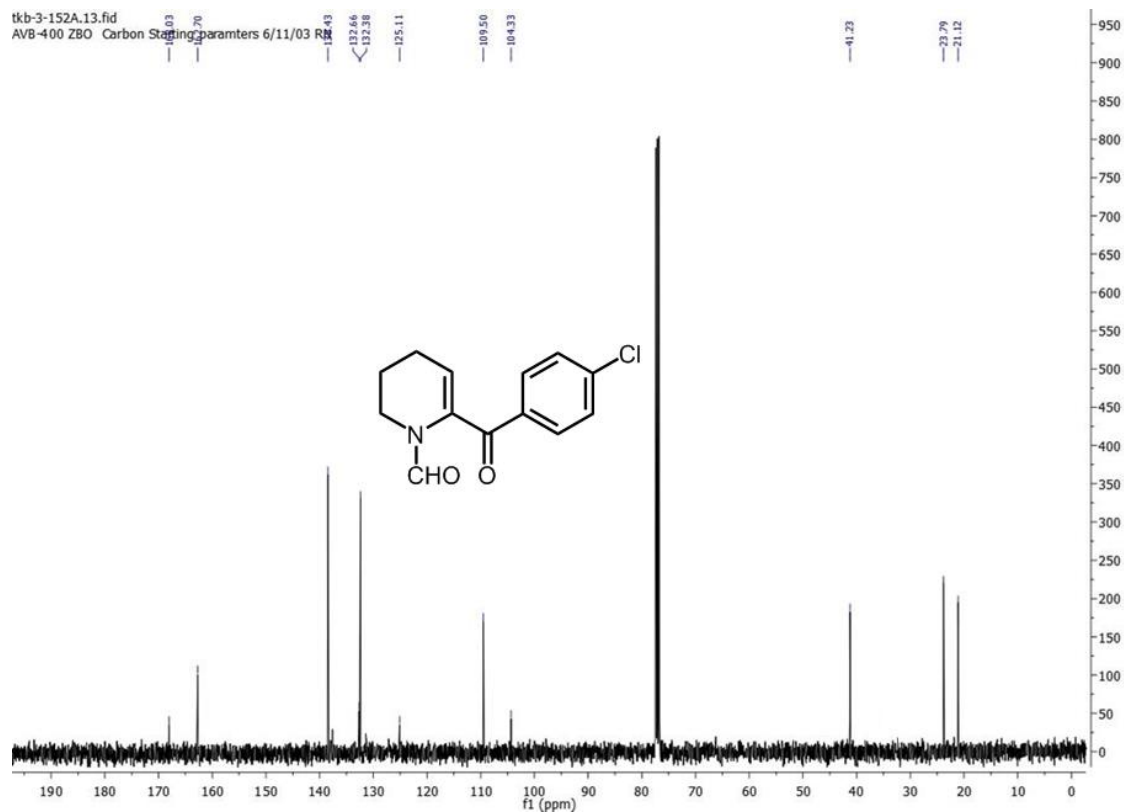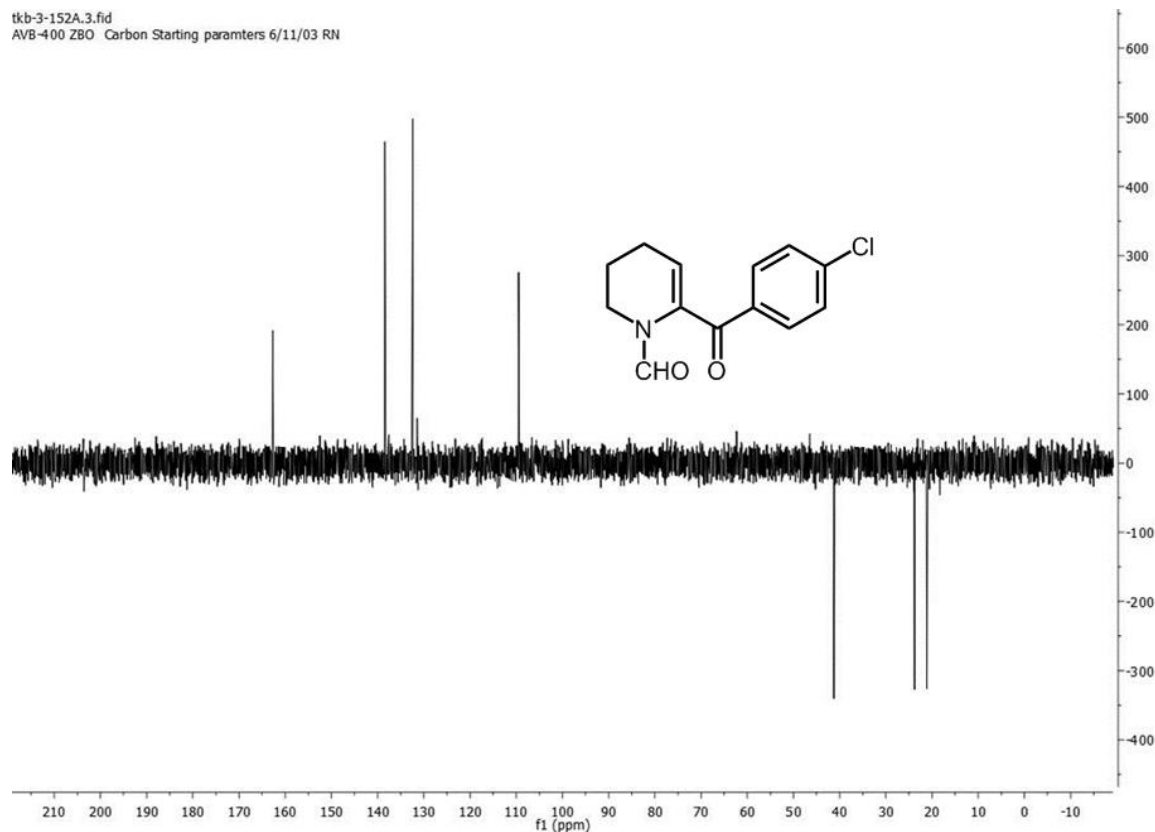

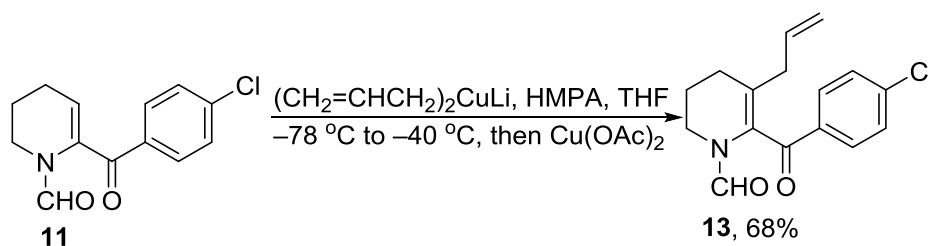

Prepared from **11**, lithium diallyl cuprate (2 equiv) and copper (II) acetate (3 equiv) using **General Procedure B. Purification**: Flash chromatography on silica (pretreated with 1% Et<sub>3</sub>N) eluting with hexane/EtOAc (90:10). Yield = 20.5 mg, 70%. <sup>1</sup>H NMR (400 MHz, CDCl<sub>3</sub>) δ 8.92 (1H, s), 7.91 (2H, d), 7.82 (2H, d), 6.11 to 6.00 (1H, m), 5.36 (1H, d), 5.32 (1H, d), 3.96 (2H, d), 3.80 to 3.78 (2H, dd), 2.26 to 2.22 (2H, m), 1.88 to 1.82 (2H, m). <sup>13</sup>C NMR (101 MHz, CDCl<sub>3</sub>) δ 162.8, 138.4, 134.1, 132.6, 132.3, 125.1, 119.1, 109.5, 104.3, 41.2, 32.9, 23.8, 21.1. HRMS calc for C<sub>16</sub>H<sub>16</sub>ClNO<sub>2</sub> 289.0870, found 289.0873.

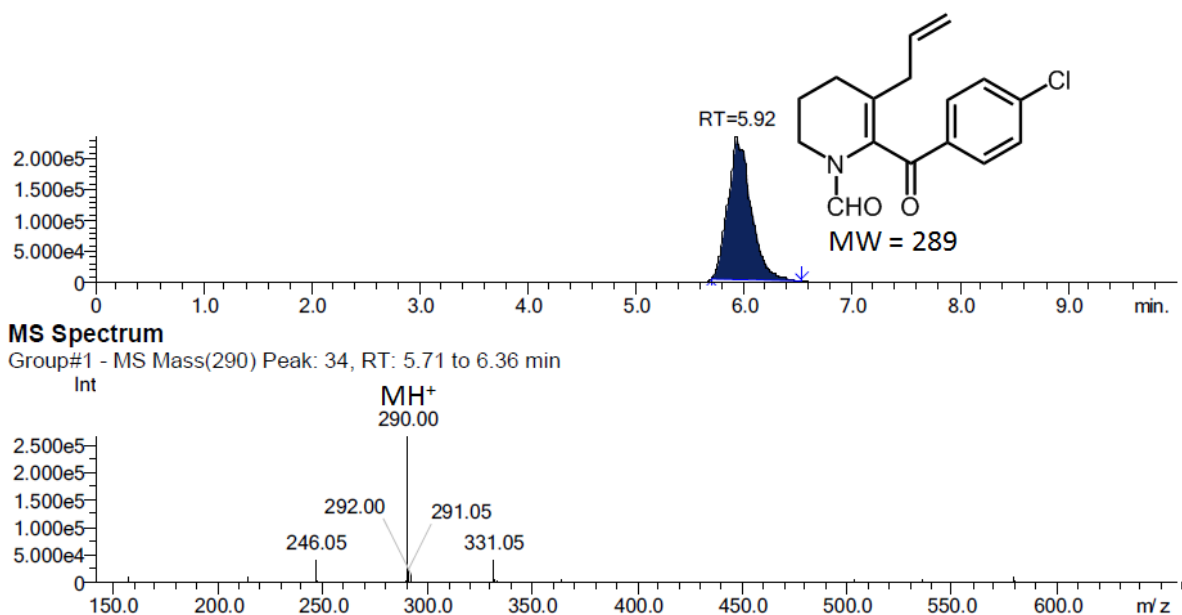

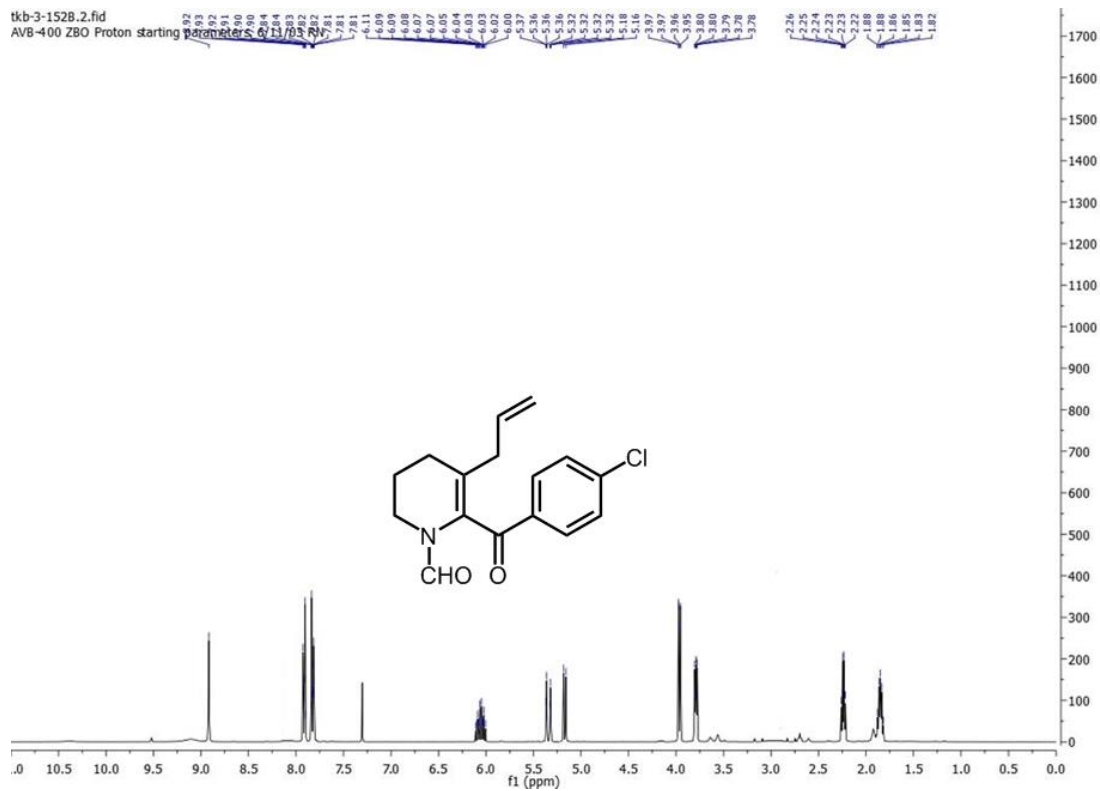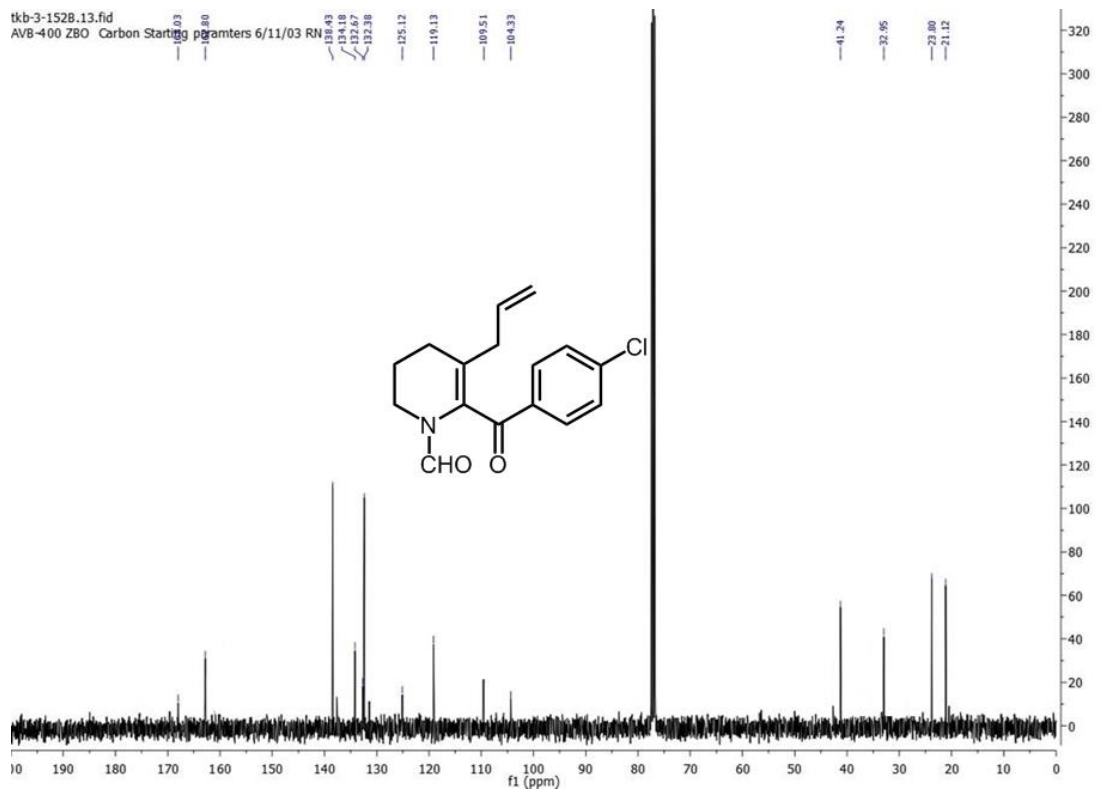

tkb-3-152B.3.fid  
AVB-400 ZBO Proton starting parameters. 6/11/03 RN

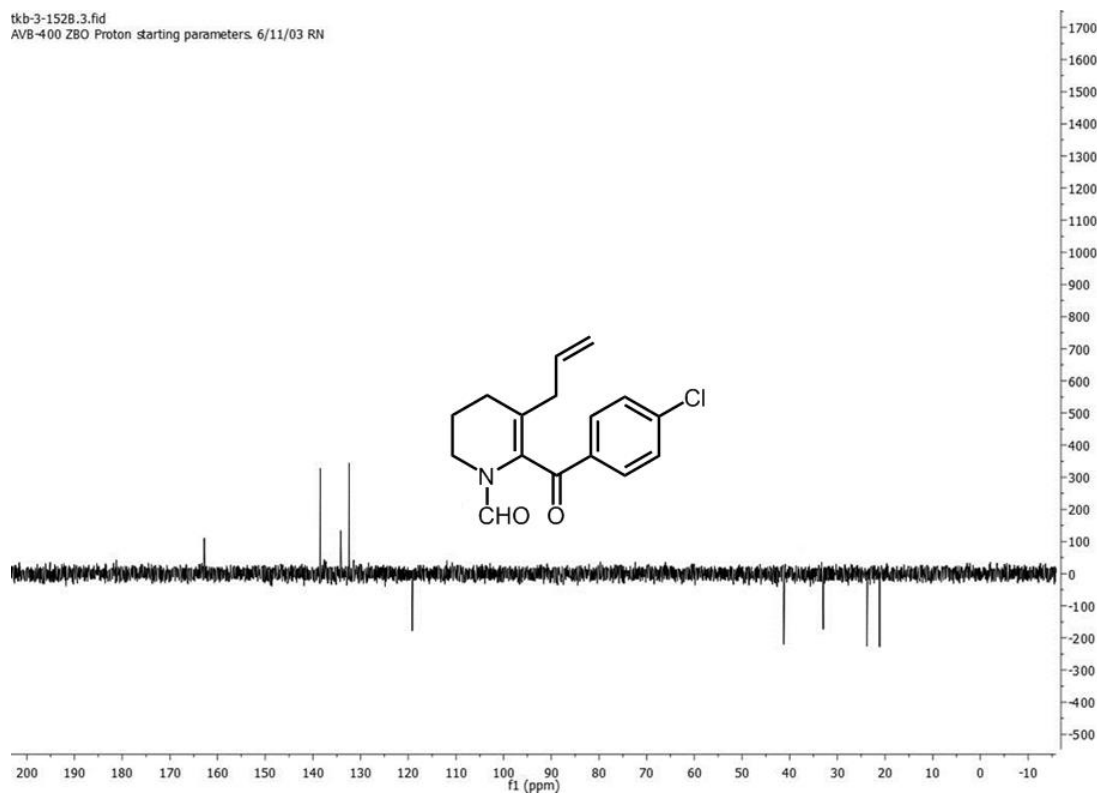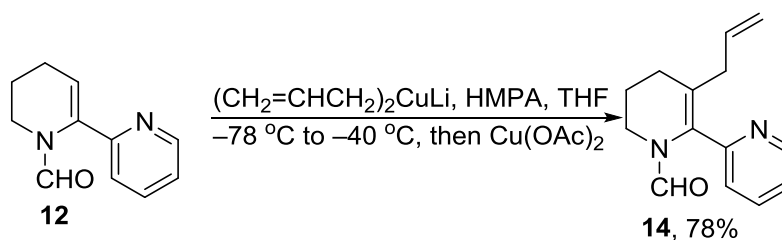

Prepared from **12**,<sup>3</sup> lithium diallyl cuprate (2 equiv) and copper (II) acetate (3 equiv) using **General Procedure B**: Flash chromatography on silica (pretreated with 1% Et<sub>3</sub>N) eluting with hexane/EtOAc (20:80 to 0:100). Yield = 13 mg, 55%. <sup>1</sup>H NMR (400 MHz, CDCl<sub>3</sub>) δ 8.87 (1H, s), 8.37 (1H, d), 7.60 to 7.48 (2H, m), 7.30 to 7.26 (1H, dd), 6.05 to 5.96 (1H, m), 5.32 to 5.28 (1H, d), 5.14 to 5.11 (1H, d), 3.92 (2H, d), 3.76 to 3.73 (2H, dd), 2.22 to 2.17 (2H, m), 1.86 to 1.77 (2H, m). <sup>13</sup>C NMR (101 MHz, CDCl<sub>3</sub>) δ 162.5, 149.9, 141.8, 138.8, 134.1, 128.4, 125.1, 122.7, 119.1, 109.5, 41.2, 36.5, 23.7, 21.1. **HRMS-EI<sup>+</sup>** (*m/z*): calc for C<sub>14</sub>H<sub>16</sub>N<sub>2</sub>O 228.1263, found 228.1265.



tkb-3-152E3.fid  
AVB-400 ZBO Carbon Starting paramters 6/11/03 RN

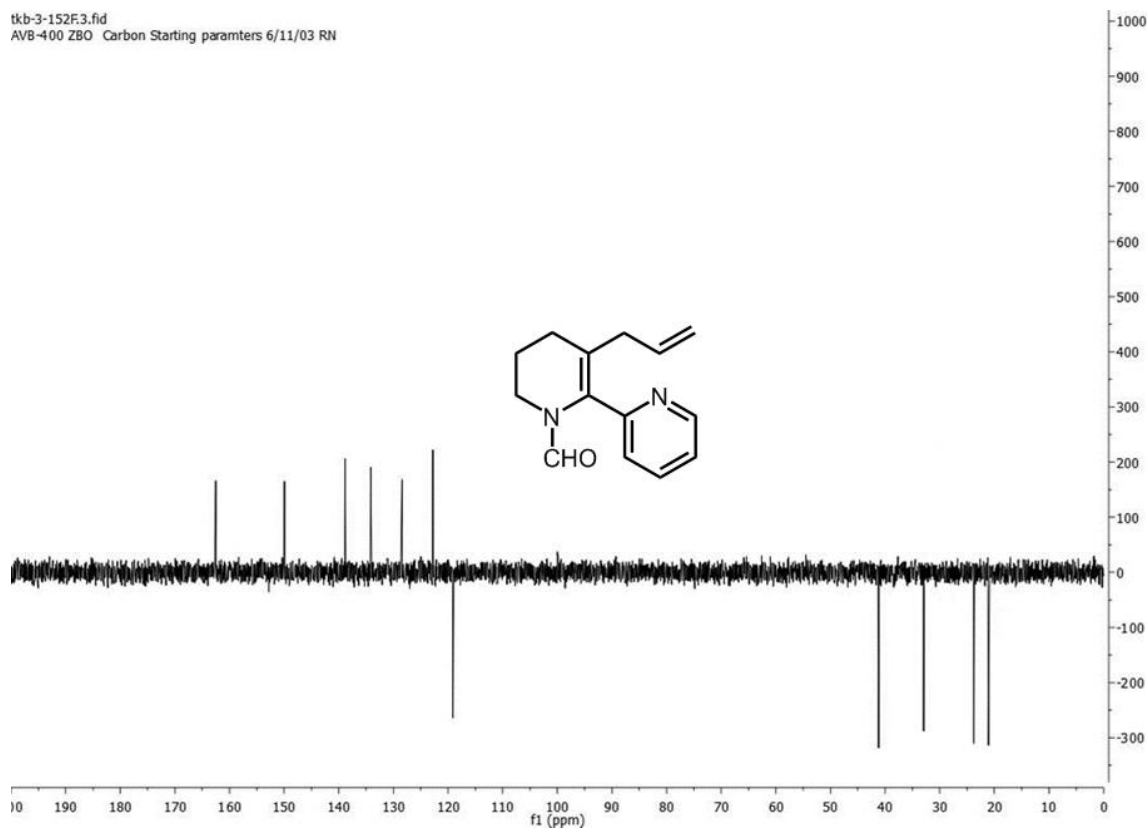

## References

1. Barker, G.; O'Brien, P.; Campos, K. R., *Org. Lett.* **2010**, *12* (18), 4176-4179.
2. Beng, T. K.; Gawley, R. E., *Heterocycles* **2012**, *84* (2), 697-718.
3. Bassler, D. P.; Alwali, A.; Spence, L.; Beale, O.; Beng, T. K., *J. Organomet. Chem.* **2015**, *780*, 6-12.
4. Cui, L.; Peng, Y.; Zhang, L., *J. Am. Chem. Soc.* **2009**, *131* (24), 8394-8395.
5. Millet, A.; Larini, P.; Clot, E.; Baudoin, O., *Chem. Sci.* **2013**, *4* (5), 2241-2247.
6. Beng, T. K.; Takeuchi, H.; Weber, M.; Sarpong, R., *Chem. Commun.* **2015**, *51* (36), 7653-7656.
